# Supplementary material for: A new network representation of the metabolism to detect chemical transformation modules
Source: PubMed Central journal article supplement (PMC4647279; doi:10.1186/s12859-015-0809-4), 2015-11-14
Supplement: 12859_2015_809_MOESM2_ESM.pdf [file 12859_2015_809_MOESM2_ESM.pdf]

## Additional file 2 – Comparison of Reaction Molecular Signature and Enzyme Commission reaction partition

- $a$  is the number of reaction pairs that are in the same set in EC and in the same set in RMS = **73408**
- $b$  is the number of reaction pairs that are in different sets in EC and in different sets in RMS = **10142098**
- $c$  is the number of reaction pairs that are in the same set in EC and in different sets in RMS = **9946**
- $d$  is the number of reaction pairs that are in different sets in EC and in the same set in RMS = **232984**

$$\text{Rand Index} = \frac{a + b}{a + b + c + d} = \frac{73408 + 10142098}{73408 + 10142098 + 9946 + 232984} = 0.976$$
