# Supplementary material for: A new network representation of the metabolism to detect chemical transformation modules
Source: PubMed Central journal article supplement (PMC4647279; doi:10.1186/s12859-015-0809-4), 2015-11-14

## Additional file 4 – Boxplots of conservation scores for enumerated and known metabolic paths

For paths of length 2 (two edges and three nodes) in the RMS-H1 network, distributions of the three conservation scores (*i.e.* *scoreRea*, *scoreProt* and *scorePageRank*) are presented in all enumerated paths versus paths in known metabolic pathways.

The latter present significant higher scores ( $p$ -value  $< 2e^{-16}$  using Tukey's HSD tests)

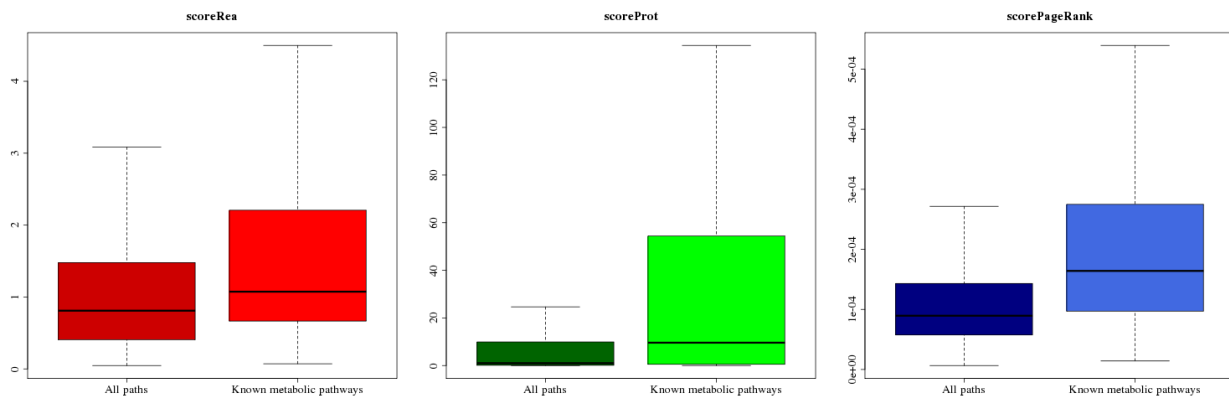

Supplement: 12859_2015_809_MOESM4_ESM.pdf [file 12859_2015_809_MOESM4_ESM.pdf]
