# Supplementary material for: A new network representation of the metabolism to detect chemical transformation modules
Source: PubMed Central journal article supplement (PMC4647279; doi:10.1186/s12859-015-0809-4), 2015-11-14
Supplement: 12859_2015_809_MOESM5_ESM.pdf [file 12859_2015_809_MOESM5_ESM.pdf]

**Additional file 5 – Statistical analysis of conservation scores distributions according to the pathway type their paths are stemming from**

Post-hoc analysis on metabolic pathway scores in order to determine if scores distributions are significantly different regarding the pathway type (biosynthesis, degradation, detoxification, energy or other). Are presented in following tables p-values from the Tukey HSD test for the three conservation scores (scoreRea, scorePageRank and scoreProt) for RMS paths from known metabolic pathways in height 2 RMS network.

**Kruskal-Wallis rank sum tests for height 2 RMS network paths scores**

H0: The distributions of path scores are identical regardless pathway type they are involved in

- **scoreRea** : Kruskal-Wallis chi-squared = 148.1694, df = 4, p-value < 2.2e-16
- **scoreProt** : Kruskal-Wallis chi-squared = 36.6593, df = 4, p-value = 2.117e-07
- **scorePageRank** : Kruskal-Wallis chi-squared = 66.2534, df = 4, p-value = 1.401e-13

**Tukey HSD p-values for distribution comparison for height 2 RMS network paths of length 2.**

| <b>Compared pathway types</b> | <b>scoreRea</b> | <b>scoreProt</b><br><i>(for all paths where scoreProt&gt;0)</i> | <b>scorePageRank</b> |
|-------------------------------|-----------------|-----------------------------------------------------------------|----------------------|
| Degradation - Biosynthesis    | 0.05            | 0.03                                                            | 0.000007             |
| Detox – Biosynthesis          | 0.99            | 0.97                                                            | 0.013                |
| Energy – Biosynthesis         | 0               | 0.0001                                                          | 0.55                 |
| Other – Biosynthesis          | 0.41            | 0.1                                                             | 0.0005               |
| Detox – Degradation           | 0.99            | 0.68                                                            | 0.00005              |
| Energy – Degradation          | 0.0000002       | 0.09                                                            | 0.83                 |
| Other - Degradation           | 0.99            | 0.95                                                            | 0.71                 |
| Energy – Detox                | 0.0067          | 0.14                                                            | 0.0032               |
| Other – Detox                 | 0.98            | 0.53                                                            | 0.000015             |
| Other – Energy                | 0.0001          | 0.64                                                            | 0.37                 |
