# Supplementary material for: A new network representation of the metabolism to detect chemical transformation modules
Source: PubMed Central journal article supplement (PMC4647279; doi:10.1186/s12859-015-0809-4), 2015-11-14
Supplement: 12859_2015_809_MOESM6_ESM.pdf [file 12859_2015_809_MOESM6_ESM.pdf]

## Additional file 6 – Metabolic pathway type prediction rules generated by NNge algorithm

Scheme:weka.classifiers.rules.NNge -G 20 -I 20

Attributes: 4  
scoreRea  
scoreProtTaxo  
scorePageRankTopoDiv  
t

Test mode:10-fold cross-validation

### === Stratified cross-validation ===

#### === Summary ===

|                                  |           |           |
|----------------------------------|-----------|-----------|
| Correctly Classified Instances   | 7822      | 94.7432 % |
| Incorrectly Classified Instances | 434       | 5.2568 %  |
| Kappa statistic                  | 0.9076    |           |
| Mean absolute error              | 0.021     |           |
| Root mean squared error          | 0.145     |           |
| Relative absolute error          | 9.2047 %  |           |
| Root relative squared error      | 42.9119 % |           |
| Total Number of Instances        | 8256      |           |

#### === Detailed Accuracy By Class ===

|               | TP Rate | FP Rate | Precision | Recall | F-Measure | ROC Area | Class        |
|---------------|---------|---------|-----------|--------|-----------|----------|--------------|
|               | 0.922   | 0.028   | 0.927     | 0.922  | 0.925     | 0.947    | DEGRADATION  |
|               | 0.965   | 0.06    | 0.958     | 0.965  | 0.961     | 0.952    | BIOSYNTHESIS |
|               | 0.929   | 0.003   | 0.947     | 0.929  | 0.938     | 0.963    | OTHER        |
|               | 0.869   | 0.001   | 0.926     | 0.869  | 0.897     | 0.934    | DETOX        |
|               | 0.935   | 0.004   | 0.939     | 0.935  | 0.937     | 0.966    | ENERGY       |
| Weighted Avg. | 0.947   | 0.043   | 0.947     | 0.947  | 0.947     | 0.952    |              |

#### === Confusion Matrix ===

| a    | b    | c   | d   | e   | <-- classified as |
|------|------|-----|-----|-----|-------------------|
| 2121 | 151  | 10  | 3   | 15  | a = DEGRADATION   |
| 136  | 4672 | 16  | 6   | 13  | b = BIOSYNTHESIS  |
| 13   | 22   | 469 | 0   | 1   | c = OTHER         |
| 6    | 11   | 0   | 113 | 0   | d = DETOX         |
| 11   | 20   | 0   | 0   | 447 | e = ENERGY        |

### === Classifier model (full training set) ===

NNGE classifier

Rules generated :

class ENERGY IF : 0.0944911182523068<=scoreRea<=0.11952286093343936 ^ 0.2380660236333224<=scoreProtTaxo<=2.467150522820092 ^ 3.9467331593969805E-5<=scorePageRankTopoDiv<=8.222097127067186E-5 (19)

class OTHER IF : 0.14824986333222023<=scoreRea<=0.23570226039551584 ^ 34.230955629673105<=scoreProtTaxo<=43.96658510801488 ^ 2.5624430194452117E-5<=scorePageRankTopoDiv<=3.2215748110582064E-5 (25)

class BIOSYNTHESIS IF : 1.3764944032233706<=scoreRea<=1.4142135623730951 ^ scoreProtTaxo=0.0 ^ 1.715924490479643E-4<=scorePageRankTopoDiv<=1.7442011676202887E-4 (9)

class BIOSYNTHESIS IF : 0.5773502691896257<=scoreRea<=1.0 ^ scoreProtTaxo=0.0 ^ 2.635996114083793E-4<=scorePageRankTopoDiv<=2.6835762452210286E-4 (16)

class BIOSYNTHESIS IF : 0.3333333333333333<=scoreRea<=0.3380617018914066 ^ scoreProtTaxo=0.0 ^ 1.7482405819301152E-4<=scorePageRankTopoDiv<=1.7796160572064972E-4 (8)

class BIOSYNTHESIS IF : 0.6282808624375432<=scoreRea<=0.7071067811865476 ^ 137.05241439564665<=scoreProtTaxo<=187.6103739034471 ^ 8.941788011599709E-5<=scorePageRankTopoDiv<=1.273031544422776E-4 (14)

class BIOSYNTHESIS IF : 1.3844373104863457<=scoreRea<=1.4142135623730951 ^ 0.0<=scoreProtTaxo<=0.48131847175072956 ^ 1.2511393920411733E-4<=scorePageRankTopoDiv<=1.2782527724143538E-4 (12)

class DEGRADATION IF : 0.5<=scoreRea<=1.0 ^ scoreProtTaxo=0.0 ^ 4.011826234288762E-5<=scorePageRankTopoDiv<=4.203593126592642E-5 (16)

class DEGRADATION IF : scoreRea=0.46770717334674267 ^ scoreProtTaxo=0.9007059016979746 ^ scorePageRankTopoDiv=3.617856201725098E-5 (2)

class BIOSYNTHESIS IF : 1.1547005383792515<=scoreRea<=2.5585578921327845 ^ 14.106547340156714<=scoreProtTaxo<=18.473453822095284 ^ 1.770564875558003E-4<=scorePageRankTopoDiv<=2.0789015753772057E-4 (13)

class OTHER IF : scoreRea=0.7071067811865476 ^ scoreProtTaxo=0.0 ^ scorePageRankTopoDiv=1.9885864310046825E-4 (6)

class BIOSYNTHESIS IF : 0.3535533905932738<=scoreRea<=0.408248290463863 ^ 0.12001422967741608<=scoreProtTaxo<=1.805290514655062 ^ 7.097145389737822E-5<=scorePageRankTopoDiv<=1.006856779682069E-4 (25)

class ENERGY IF : scoreRea=0.24743582965269673 ^ scoreProtTaxo=45.5775940290842 ^ scorePageRankTopoDiv=6.303181454151838E-5 (3)

class BIOSYNTHESIS IF : scoreRea=1.4142135623730951 ^ scoreProtTaxo=0.0 ^ scorePageRankTopoDiv=3.4486469678956296E-4 (3)

class BIOSYNTHESIS IF : 2.3145502494313788<=scoreRea<=4.636809247747852 ^ 0.13557591986987977<=scoreProtTaxo<=40.3956525235376 ^ 6.279108186413624E-5<=scorePageRankTopoDiv<=1.1946954132219554E-4 (26)

class BIOSYNTHESIS IF : 1.7320508075688772<=scoreRea<=3.055050463303893 ^ 98.40420334876411<=scoreProtTaxo<=378.82319006045105 ^ 1.2993501217585093E-4<=scorePageRankTopoDiv<=1.3143712413214126E-4 (6)

class DEGRADATION IF : 0.7071067811865476<=scoreRea<=0.8320502943378437 ^ 20.577608238503228<=scoreProtTaxo<=70.40532050487963 ^ 1.4711128835871555E-4<=scorePageRankTopoDiv<=1.5582750065655076E-4 (6)

class ENERGY IF : 0.14680505487867587<=scoreRea<=0.1749635530559413 ^ 1.5153219406847809<=scoreProtTaxo<=59.68013546214413 ^ 4.522582100052408E-5<=scorePageRankTopoDiv<=6.316112041496758E-5 (12)

class BIOSYNTHESIS IF : 1.5811388300841898<=scoreRea<=3.3806170189140663 ^ 89.64616712273855<=scoreProtTaxo<=93.87272426424039 ^ 4.616620362534685E-4<=scorePageRankTopoDiv<=6.13379441752335E-4 (8)

class BIOSYNTHESIS IF : 0.1714399631667259<=scoreRea<=0.75 ^ 0.35675283566636734<=scoreProtTaxo<=0.5896504247749174 ^ 2.5285969726396953E-5<=scorePageRankTopoDiv<=4.035096476002114E-5 (30)

class BIOSYNTHESIS IF : 1.4675987714106857<=scoreRea<=1.5275252316519465 ^ scoreProtTaxo=0.0 ^ 1.4824279368028657E-4<=scorePageRankTopoDiv<=1.873432940507961E-4 (7)

class DEGRADATION IF : 0.4330127018922193<=scoreRea<=0.6064172948423149 ^ 0.5629775241084929<=scoreProtTaxo<=36.00546680035225 ^ 4.043811427310258E-5<=scorePageRankTopoDiv<=4.107288757033667E-5 (17)

class DEGRADATION IF : scoreRea=1.3363062095621219 ^ scoreProtTaxo=59.8217421667204 ^ scorePageRankTopoDiv=6.927263515039377E-5 (4)

class BIOSYNTHESIS IF : scoreRea=1.0 ^ scoreProtTaxo=0.0 ^ 2.4385616569174256E-4<=scorePageRankTopoDiv<=2.4446999316006323E-4 (12)

class BIOSYNTHESIS IF : 1.3693063937629153<=scoreRea<=2.4776781245530843 ^ 0.050541374706292774<=scoreProtTaxo<=40.716794145116985 ^ 4.4582055374839147E-4<=scorePageRankTopoDiv<=5.910409514342583E-4 (23)

class BIOSYNTHESIS IF : 0.28867513459481287<=scoreRea<=0.6695340634119862 ^ 0.0<=scoreProtTaxo<=0.09750442980201487 ^ 2.3078302774459267E-5<=scorePageRankTopoDiv<=2.654390416091464E-5 (19)

class DEGRADATION IF : 1.0<=scoreRea<=1.0933445471810679 ^ scoreProtTaxo=0.0 ^ 1.5119971642290792E-4<=scorePageRankTopoDiv<=1.5165145812969067E-4 (11)

class DEGRADATION IF : 0.3535533905932738<=scoreRea<=0.408248290463863 ^ scoreProtTaxo=0.0 ^ 1.2760655041187276E-4<=scorePageRankTopoDiv<=1.8234241192197802E-4 (20)

class BIOSYNTHESIS IF : 0.42491829279939874<=scoreRea<=0.4629100498862757 ^ 0.0019539003218056023<=scoreProtTaxo<=10.579425554589232 ^ 6.0762810298399056E-5<=scorePageRankTopoDiv<=6.0772374429749914E-5 (11)

class BIOSYNTHESIS IF : 1.118033988749895<=scoreRea<=1.5491933384829668 ^ 28.3876733812448<=scoreProtTaxo<=171.2522187159527 ^ 1.214796345552975E-4<=scorePageRankTopoDiv<=1.339312706332986E-4 (38)

class BIOSYNTHESIS IF : 0.1666666666666666<=scoreRea<=0.5477225575051662 ^ 211.6065492558517<=scoreProtTaxo<=354.05109611467765 ^ 2.4353028660813146E-5<=scorePageRankTopoDiv<=1.12430516234085E-4 (38)

class DEGRADATION IF : 0.408248290463863<=scoreRea<=0.5443310539518174 ^ 0.05342416342328977<=scoreProtTaxo<=9.574954409747393 ^ 6.276174469714381E-5<=scorePageRankTopoDiv<=6.541810444814617E-5 (15)

class DEGRADATION IF : scoreRea=0.5773502691896257 ^ scoreProtTaxo=150.93034502106704 ^ scorePageRankTopoDiv=1.3168334991139308E-4 (7)

class DEGRADATION IF : 0.49507377148833714<=scoreRea<=0.6370220572706061 ^ 3.116903115717679<=scoreProtTaxo<=10.859160785877924 ^ 3.192381751198706E-5<=scorePageRankTopoDiv<=3.283073109307133E-5 (4)

class DEGRADATION IF : 0.9848476085314292<=scoreRea<=1.311651671567906 ^ 0.0015315028922544994<=scoreProtTaxo<=0.012958469829493875 ^ 1.6285332302952283E-4<=scorePageRankTopoDiv<=1.6807726764800455E-4 (10)

class DEGRADATION IF : 1.5146344928922038<=scoreRea<=1.5387160422974504 ^ 4.37231962355855<=scoreProtTaxo<=45.81247528729291 ^ 1.0060730209984355E-4<=scorePageRankTopoDiv<=1.0542570447093832E-4 (2)

class DEGRADATION IF : scoreRea=1.4950900031928038 ^ scoreProtTaxo=23.643450906127864 ^ scorePageRankTopoDiv=1.0170788148269443E-4 (4)

class DEGRADATION IF : 1.4038890593022617<=scoreRea<=1.5275252316519465 ^ 0.0<=scoreProtTaxo<=0.22494079551498097 ^ 1.0295047718367274E-4<=scorePageRankTopoDiv<=1.0359361723184283E-4 (11)

class DEGRADATION IF : 1.5191090506255<=scoreRea<=1.632993161855452 ^ scoreProtTaxo=0.0 ^ 8.767676776912526E-5<=scorePageRankTopoDiv<=9.866342288397187E-5 (6)

class DEGRADATION IF : 1.1473127431577863<=scoreRea<=1.695582495781317 ^ 0.4173866279031499<=scoreProtTaxo<=0.6904483523297835 ^ 8.283363561372424E-5<=scorePageRankTopoDiv<=1.1294034404114938E-4 (28)

class BIOSYNTHESIS IF : scoreRea=1.495090003192804 ^ scoreProtTaxo=23.643450906127864 ^ scorePageRankTopoDiv=1.0170788148269442E-4 (2)

class BIOSYNTHESIS IF : 0.1767766952966369<=scoreRea<=0.18257418583505536 ^ 1.4521302510479395<=scoreProtTaxo<=4.3847354266734015 ^ 1.872670084424061E-5<=scorePageRankTopoDiv<=2.0210433645597785E-5 (14)

class DEGRADATION IF : 1.6519994452731097<=scoreRea<=1.7320508075688772 ^ 0.0<=scoreProtTaxo<=0.11859382190794628 ^ 1.659536769761936E-4<=scorePageRankTopoDiv<=2.1296498231818996E-4 (10)

class DEGRADATION IF : 1.0<=scoreRea<=1.1547005383792515 ^ 0.0<=scoreProtTaxo<=0.5811794521613008 ^ 7.132515955266688E-5<=scorePageRankTopoDiv<=7.875167426911117E-5 (31)

class DEGRADATION IF : 0.08006407690254357<=scoreRea<=0.08425254637422692 ^ 0.7466289594192045<=scoreProtTaxo<=10.949924907214125 ^ 2.839311395403713E-5<=scorePageRankTopoDiv<=3.3883828455200255E-5 (8)

class BIOSYNTHESIS IF : scoreRea=0.25 ^ scoreProtTaxo=0.0 ^ scorePageRankTopoDiv=3.1827594371485E-5 (2)

class BIOSYNTHESIS IF : 0.30151134457776363<=scoreRea<=0.35805743701971643 ^ 33.13265144118489<=scoreProtTaxo<=165.40664584751835 ^ 2.1781192991062262E-5<=scorePageRankTopoDiv<=3.331904960288265E-5 (29)  
class DEGRADATION IF : scoreRea=2.0 ^ scoreProtTaxo=52.67513222304043 ^ scorePageRankTopoDiv=2.4625803787683525E-4 (6)  
class DEGRADATION IF : scoreRea=0.5 ^ scoreProtTaxo=51.0656694346673 ^ scorePageRankTopoDiv=6.415037616460833E-5 (7)  
class BIOSYNTHESIS IF : scoreRea=0.7071067811865476 ^ scoreProtTaxo=0.0 ^ 1.7047280223499706E-4<=scorePageRankTopoDiv<=1.7681757651857256E-4 (23)  
class BIOSYNTHESIS IF : 0.5<=scoreRea<=0.5345224838248488 ^ 92.58392887825794<=scoreProtTaxo<=645.2183120206236 ^ 1.8665619280014382E-4<=scorePageRankTopoDiv<=3.987942542101376E-4 (34)  
class BIOSYNTHESIS IF : 0.816496580927726<=scoreRea<=1.6770509831248424 ^ 0.02414552317287656<=scoreProtTaxo<=60.881932950570835 ^ 2.8126292026083763E-5<=scorePageRankTopoDiv<=4.606334372579576E-5 (39)  
class BIOSYNTHESIS IF : 0.8944271909999159<=scoreRea<=1.0053333711589283 ^ 17.297810329416045<=scoreProtTaxo<=71.7572486719615 ^ 6.17572370468687E-5<=scorePageRankTopoDiv<=6.430819501851288E-5 (26)  
class BIOSYNTHESIS IF : 3.872983346207417<=scoreRea<=5.366563145999495 ^ 0.0<=scoreProtTaxo<=0.15260553574759061 ^ 1.400236268308033E-4<=scorePageRankTopoDiv<=4.1749250632250665E-4 (39)  
class DEGRADATION IF : scoreRea=1.0 ^ scoreProtTaxo=0.0 ^ 1.915262928751791E-4<=scorePageRankTopoDiv<=1.9197527419422426E-4 (6)  
class BIOSYNTHESIS IF : 1.0540925533894596<=scoreRea<=1.2909944487358058 ^ 27.91959473984153<=scoreProtTaxo<=59.62840121189813 ^ 1.7853466287135828E-4<=scorePageRankTopoDiv<=2.449337716498709E-4 (21)  
class BIOSYNTHESIS IF : 0.7637626158259734<=scoreRea<=0.8944271909999159 ^ 222.78010111168732<=scoreProtTaxo<=260.81456976412017 ^ 7.669479555608071E-5<=scorePageRankTopoDiv<=1.253740888154235E-4 (14)  
class DEGRADATION IF : scoreRea=0.4472135954999579 ^ scoreProtTaxo=0.0 ^ 1.2853202642214428E-4<=scorePageRankTopoDiv<=1.297143538338404E-4 (6)  
class BIOSYNTHESIS IF : 1.741143000264028<=scoreRea<=1.9578900207451218 ^ 0.043526169552462184<=scoreProtTaxo<=0.4496737139612123 ^ 7.047799086950667E-5<=scorePageRankTopoDiv<=1.3754176330353984E-4 (9)  
class BIOSYNTHESIS IF : 2.0<=scoreRea<=2.23606797749979 ^ scoreProtTaxo=0.0 ^ 1.3107866933148774E-4<=scorePageRankTopoDiv<=1.5035776480829834E-4 (16)  
class BIOSYNTHESIS IF : 0.4330127018922193<=scoreRea<=0.7071067811865476 ^ 37.96986447132463<=scoreProtTaxo<=47.476763977188085 ^ 6.0575541963087874E-5<=scorePageRankTopoDiv<=8.184055624663284E-5 (38)  
class BIOSYNTHESIS IF : 0.4216370213557839<=scoreRea<=0.6666666666666666 ^ 0.0<=scoreProtTaxo<=29.109935803778434 ^ 2.9791555817155357E-4<=scorePageRankTopoDiv<=4.7186282623621316E-4 (34)  
class DEGRADATION IF : 0.12964074471043288<=scoreRea<=0.14625448482542613 ^ 11.675943716030119<=scoreProtTaxo<=12.568556538811487 ^ 5.304913067771752E-5<=scorePageRankTopoDiv<=5.665850725133843E-5 (3)  
class DEGRADATION IF : scoreRea=0.10846522890932808 ^ scoreProtTaxo=0.0 ^ scorePageRankTopoDiv=5.484507680933927E-5 (6)  
class DEGRADATION IF : 0.13693063937629155<=scoreRea<=0.16484511834894675 ^ 0.1642099863440641<=scoreProtTaxo<=1.410655334621784 ^ 4.765343982056646E-5<=scorePageRankTopoDiv<=5.694991249826218E-5 (9)  
class DEGRADATION IF : 1.6064386578049976<=scoreRea<=1.6449566416599486 ^ scoreProtTaxo=0.0 ^ 1.1726683964274192E-4<=scorePageRankTopoDiv<=1.449097451000517E-4 (5)  
class BIOSYNTHESIS IF : 0.29277002188455997<=scoreRea<=0.5014598571212789 ^ 0.3353271363778662<=scoreProtTaxo<=24.040204420303578 ^ 5.49874466379079E-5<=scorePageRankTopoDiv<=5.58575845653719E-5 (8)  
class DEGRADATION IF : scoreRea=1.4142135623730951 ^ scoreProtTaxo=0.0 ^ 1.744724650945507E-4<=scorePageRankTopoDiv<=2.034274877002086E-4 (15)  
class BIOSYNTHESIS IF : 1.1881770515720091<=scoreRea<=1.5029382986043587 ^ 0.0<=scoreProtTaxo<=22.635275882667845 ^ 5.641772204858564E-5<=scorePageRankTopoDiv<=7.202261364213803E-5 (30)  
class DEGRADATION IF : scoreRea=1.0 ^ scoreProtTaxo=0.0 ^ scorePageRankTopoDiv=9.184702952142395E-5 (2)  
class DEGRADATION IF : scoreRea=0.9274777915203366 ^ scoreProtTaxo=0.5535860737834317 ^ scorePageRankTopoDiv=1.037932024148532E-4 (3)  
class DEGRADATION IF : 0.50709255283711<=scoreRea<=1.1631599960755994 ^ 89.65243916336601<=scoreProtTaxo<=100.84577451615787 ^ 7.732571433805503E-5<=scorePageRankTopoDiv<=8.535041606710396E-5 (10)  
class DEGRADATION IF : 1.224744871391589<=scoreRea<=1.3093073414159542 ^ scoreProtTaxo=0.0 ^ 7.82482349181678E-5<=scorePageRankTopoDiv<=9.00962259154721E-5 (5)  
class DEGRADATION IF : 1.1547005383792515<=scoreRea<=1.2524485821702989 ^ 11.082570599674515<=scoreProtTaxo<=33.413640851598345 ^ 7.335639963672055E-5<=scorePageRankTopoDiv<=8.351353906970459E-5 (7)  
class DEGRADATION IF : 0.8041247051007595<=scoreRea<=0.816496580927726 ^ 0.0<=scoreProtTaxo<=0.4896220574897665 ^ 9.817141430648813E-5<=scorePageRankTopoDiv<=1.0140742186772612E-4 (5)  
class DEGRADATION IF : 0.7745966692414834<=scoreRea<=0.7905694150420949 ^ 14.979713836562523<=scoreProtTaxo<=62.92772912755101 ^ 9.188674496119563E-5<=scorePageRankTopoDiv<=9.344114513260257E-5 (9)  
class DEGRADATION IF : 0.9354143466934853<=scoreRea<=1.0 ^ 28.41909081319826<=scoreProtTaxo<=81.7234468469862 ^ 7.509686129369359E-5<=scorePageRankTopoDiv<=8.22600297747681E-5 (10)  
class DEGRADATION IF : scoreRea=0.8469010445797931 ^ scoreProtTaxo=29.848706892410423 ^ scorePageRankTopoDiv=9.674817445529926E-5 (2)  
class DEGRADATION IF : scoreRea=1.0 ^ scoreProtTaxo=0.0 ^ 8.076306394889498E-5<=scorePageRankTopoDiv<=8.197307718578433E-5 (8)  
class DEGRADATION IF : 0.7494854201795578<=scoreRea<=0.985184366143778 ^ 10.922282224695822<=scoreProtTaxo<=17.77683221349325 ^ 9.980433002573033E-5<=scorePageRankTopoDiv<=1.0634169150311942E-4 (10)  
class DEGRADATION IF : 1.018350154434631<=scoreRea<=1.224744871391589 ^ 22.39494298336476<=scoreProtTaxo<=30.169323270783604 ^ 9.814808299652264E-5<=scorePageRankTopoDiv<=9.975494599478356E-5 (10)  
class DEGRADATION IF : 1.0954451150103324<=scoreRea<=1.1547005383792515 ^ scoreProtTaxo=0.0 ^ 9.654374763933151E-5<=scorePageRankTopoDiv<=1.0165350230008272E-4 (5)  
class DEGRADATION IF : scoreRea=0.9537823244295424 ^ scoreProtTaxo=0.0362368127852091 ^ scorePageRankTopoDiv=9.728342671754269E-5 (4)  
class DEGRADATION IF : scoreRea=0.9428090415820634 ^ scoreProtTaxo=40.261490960005546 ^ scorePageRankTopoDiv=9.140981407470723E-5 (3)  
class DEGRADATION IF : scoreRea=0.9274777915203366 ^ scoreProtTaxo=0.34489461142032407 ^ scorePageRankTopoDiv=8.803860930748013E-5 (8)  
class DEGRADATION IF : scoreRea=1.0 ^ scoreProtTaxo=16.564961694015768 ^ scorePageRankTopoDiv=9.38994836757291E-5 (2)  
class DEGRADATION IF : scoreRea=1.0 ^ scoreProtTaxo=0.0 ^ scorePageRankTopoDiv=8.952154062194338E-5 (8)  
class DEGRADATION IF : 0.9746794344808964<=scoreRea<=1.0 ^ 2.460269816937521<=scoreProtTaxo<=4.622017759238929 ^ 7.201957047401327E-5<=scorePageRankTopoDiv<=1.0315296708591542E-4 (13)  
class BIOSYNTHESIS IF : scoreRea=1.0 ^ scoreProtTaxo=0.0 ^ scorePageRankTopoDiv=9.069895169067138E-5 (3)

class DEGRADATION IF : 0.45374260648651504<=scoreRea<=0.4629100498862757 ^ 0.0<=scoreProtTaxo<=1.8771129021538737 ^ 9.224164089012893E-5<=scorePageRankTopoDiv<=1.0071405108661644E-4 (6)

class BIOSYNTHESIS IF : 0.5773502691896257<=scoreRea<=0.6708203932499369 ^ 274.70343271754246<=scoreProtTaxo<=766.5790693441894 ^ 4.5131690253895185E-5<=scorePageRankTopoDiv<=1.2501321987107045E-4 (26)

class BIOSYNTHESIS IF : 0.3779644730092272<=scoreRea<=0.5773502691896257 ^ 6.102381276116212<=scoreProtTaxo<=11.022017678245241 ^ 1.8888026238506796E-4<=scorePageRankTopoDiv<=2.0115792013336494E-4 (19)

class ENERGY IF : scoreRea=0.7150969419341943 ^ scoreProtTaxo=1.6971631401665692 ^ scorePageRankTopoDiv=1.0511897867639374E-4 (6)

class BIOSYNTHESIS IF : scoreRea=0.7071067811865476 ^ 52.65882180233855<=scoreProtTaxo<=797.4352638302629 ^ 1.8282788138177227E-4<=scorePageRankTopoDiv<=2.7540019598240703E-4 (35)

class DEGRADATION IF : 0.2581988897471611<=scoreRea<=2.6457513110645907 ^ 0.0<=scoreProtTaxo<=38.05578532590208 ^ 5.2686476747723835E-5<=scorePageRankTopoDiv<=5.302790721846163E-5 (18)

class DEGRADATION IF : scoreRea=1.0 ^ scoreProtTaxo=122.91212562233233 ^ scorePageRankTopoDiv=1.6215651469509557E-4 (7)

class ENERGY IF : 0.2637521893583148<=scoreRea<=0.3730019232961255 ^ 60.86198732982632<=scoreProtTaxo<=86.07184791481986 ^ 1.6848744964407823E-4<=scorePageRankTopoDiv<=2.3827723637630932E-4 (23)

class BIOSYNTHESIS IF : 1.0954451150103324<=scoreRea<=1.322875655322954 ^ 82.12786352410112<=scoreProtTaxo<=119.36925641394684 ^ 1.0627502598211805E-4<=scorePageRankTopoDiv<=1.1655246691256627E-4 (9)

class BIOSYNTHESIS IF : 1.9148542155126762<=scoreRea<=2.1908902300206647 ^ scoreProtTaxo=0.0 ^ 1.64678663392129E-4<=scorePageRankTopoDiv<=2.181666849824038E-4 (29)

class BIOSYNTHESIS IF : 0.3939192985791677<=scoreRea<=0.7833494518006402 ^ 169.97802057365087<=scoreProtTaxo<=183.56764420773487 ^ 1.253685083966662E-5<=scorePageRankTopoDiv<=7.240151514526351E-5 (17)

class BIOSYNTHESIS IF : 0.7071067811865476<=scoreRea<=0.8498365855987975 ^ 0.0<=scoreProtTaxo<=0.2705728571551526 ^ 1.7988095066634002E-4<=scorePageRankTopoDiv<=1.9845237065041013E-4 (23)

class BIOSYNTHESIS IF : 0.7337993857053428<=scoreRea<=0.7947194142390263 ^ 45.944098229304075<=scoreProtTaxo<=81.91194155996973 ^ 7.613039874230699E-5<=scorePageRankTopoDiv<=7.666851418879933E-5 (16)

class BIOSYNTHESIS IF : 0.2581988897471611<=scoreRea<=0.5477225575051662 ^ 5.532750116334787<=scoreProtTaxo<=7.5348917327195295 ^ 4.1810101055858513E-5<=scorePageRankTopoDiv<=4.352867374835336E-5 (19)

class BIOSYNTHESIS IF : scoreRea=0.7071067811865476 ^ scoreProtTaxo=0.0 ^ 6.722085282994288E-5<=scorePageRankTopoDiv<=7.902934973945932E-5 (20)

class BIOSYNTHESIS IF : 0.6577935144802719<=scoreRea<=0.9428090415820634 ^ 22.113552769424796<=scoreProtTaxo<=135.82372101723521 ^ 9.796435133998824E-5<=scorePageRankTopoDiv<=1.0691434479612118E-4 (21)

class DEGRADATION IF : 0.6340037731068526<=scoreRea<=0.655825835783953 ^ 1.1516798782906763<=scoreProtTaxo<=1.4843251210366566 ^ 7.791134999632446E-5<=scorePageRankTopoDiv<=7.928770882931432E-5 (7)

class BIOSYNTHESIS IF : 0.30151134457776363<=scoreRea<=0.7905694150420949 ^ 17.01863620075732<=scoreProtTaxo<=19.559777958158104 ^ 1.319538661068268E-4<=scorePageRankTopoDiv<=1.9256485630141714E-4 (22)

class ENERGY IF : 0.18650096164806276<=scoreRea<=0.25 ^ 43.03592395740993<=scoreProtTaxo<=159.8937216743261 ^ 1.065214877529157E-4<=scorePageRankTopoDiv<=1.2057775407382344E-4 (14)

class BIOSYNTHESIS IF : 0.2041241452319315<=scoreRea<=0.8100925873009825 ^ 0.84787770446752<=scoreProtTaxo<=1.07488125772181 ^ 4.479895441755911E-5<=scorePageRankTopoDiv<=5.224748600927068E-5 (43)

class BIOSYNTHESIS IF : 1.4142135623730951<=scoreRea<=1.7320508075688772 ^ 0.0<=scoreProtTaxo<=0.0017025599442490314 ^ 2.2512882518055442E-4<=scorePageRankTopoDiv<=2.318761271239482E-4 (9)

class BIOSYNTHESIS IF : 1.0<=scoreRea<=1.741143000264028 ^ 0.9547413240085996<=scoreProtTaxo<=1.087186042233232 ^ 7.339287726861064E-5<=scorePageRankTopoDiv<=2.2506623584351968E-4 (14)

class BIOSYNTHESIS IF : 1.3764944032233706<=scoreRea<=1.8257418583505536 ^ 0.21419754504487418<=scoreProtTaxo<=0.9059002542530397 ^ 1.4570108837029384E-4<=scorePageRankTopoDiv<=2.873744946297966E-4 (13)

class BIOSYNTHESIS IF : scoreRea=1.0 ^ scoreProtTaxo=0.0 ^ 1.9671667363256823E-4<=scorePageRankTopoDiv<=1.9910561982231135E-4 (15)

class DEGRADATION IF : scoreRea=1.0 ^ 53.30721343159817<=scoreProtTaxo<=65.92162734927443 ^ 2.0561721671014314E-4<=scorePageRankTopoDiv<=2.1409527794787715E-4 (10)

class BIOSYNTHESIS IF : 0.5773502691896257<=scoreRea<=0.7071067811865476 ^ scoreProtTaxo=0.0 ^ 2.0636566208728405E-4<=scorePageRankTopoDiv<=2.0648542319897373E-4 (8)

class DEGRADATION IF : scoreRea=1.955384722187607 ^ scoreProtTaxo=74.18271953470759 ^ scorePageRankTopoDiv=8.258174752930541E-5 (3)

class ENERGY IF : 0.07715167498104596<=scoreRea<=0.12838814775327387 ^ 2.769418330851198<=scoreProtTaxo<=58.32783116309947 ^ 5.124932507561116E-5<=scorePageRankTopoDiv<=5.800682326550666E-5 (10)

class BIOSYNTHESIS IF : 0.22360679774997896<=scoreRea<=0.2672612419124244 ^ 1.141503527382941<=scoreProtTaxo<=13.075793923503037 ^ 2.623148740185707E-5<=scorePageRankTopoDiv<=2.9645682753051047E-5 (34)

class DEGRADATION IF : scoreRea=0.2587745847533828 ^ scoreProtTaxo=5.139256758115308 ^ scorePageRankTopoDiv=2.3863079676344778E-5 (4)

class DEGRADATION IF : 0.9428090415820634<=scoreRea<=1.0 ^ scoreProtTaxo=0.0 ^ 1.4502820216803015E-4<=scorePageRankTopoDiv<=1.4627385295981182E-4 (16)

class BIOSYNTHESIS IF : 2.86038776773677<=scoreRea<=3.4070284908193678 ^ 0.07315322734412<=scoreProtTaxo<=12.354434163067936 ^ 1.2498272102971447E-4<=scorePageRankTopoDiv<=2.4284228051064344E-4 (36)

class DEGRADATION IF : 0.2123976976214366<=scoreRea<=0.25 ^ scoreProtTaxo=0.0 ^ 3.586505967582538E-5<=scorePageRankTopoDiv<=4.13572229377226E-5 (3)

class OTHER IF : 0.16666666666666666<=scoreRea<=0.32163376045133846 ^ 50.57748410849425<=scoreProtTaxo<=60.41469432517077 ^ 9.017824067309039E-6<=scorePageRankTopoDiv<=1.9368859864889623E-5 (31)

class DEGRADATION IF : 0.4330127018922193<=scoreRea<=0.445545919354113 ^ 0.3873573198705962<=scoreProtTaxo<=6.126887661574918 ^ 8.022070904715247E-5<=scorePageRankTopoDiv<=8.382281480674639E-5 (5)

class DEGRADATION IF : 0.5773502691896257<=scoreRea<=0.5976143046671968 ^ scoreProtTaxo=0.0 ^ 9.293451231433748E-5<=scorePageRankTopoDiv<=9.543701626424988E-5 (5)

class DEGRADATION IF : scoreRea=0.408248290463863 ^ scoreProtTaxo=0.0 ^ scorePageRankTopoDiv=8.759460449880492E-5 (1)

class DEGRADATION IF : 0.49065338146265813<=scoreRea<=0.5 ^ scoreProtTaxo=0.0 ^ 8.136860247612824E-5<=scorePageRankTopoDiv<=8.749759780663291E-5 (8)

class DEGRADATION IF : 0.4264014327112209<=scoreRea<=0.4330127018922193 ^ 0.0<=scoreProtTaxo<=5.833138966641785 ^ 8.865063231330154E-5<=scorePageRankTopoDiv<=9.041648195074965E-5 (5)

class BIOSYNTHESIS IF : scoreRea=0.408248290463863 ^ scoreProtTaxo=0.0 ^ scorePageRankTopoDiv=1.0024486181235397E-4 (3)  
class BIOSYNTHESIS IF : scoreRea=0.5 ^ scoreProtTaxo=0.0 ^ 9.144319250957409E-5<=scorePageRankTopoDiv<=1.0459222146356342E-4 (17)  
class BIOSYNTHESIS IF : 0.48507125007266594<=scoreRea<=0.7559289460184544 ^ 14.876157414391628<=scoreProtTaxo<=63.77848346900098 ^ 1.1719585732214434E-4<=scorePageRankTopoDiv<=1.2423485591910442E-4 (30)  
class BIOSYNTHESIS IF : 1.35400640077266<=scoreRea<=3.289913283319897 ^ 602.4307334503723<=scoreProtTaxo<=970.2809711123874 ^ 3.2452727807493777E-4<=scorePageRankTopoDiv<=3.6817602382859356E-4 (8)  
class BIOSYNTHESIS IF : 0.8637684928578397<=scoreRea<=1.2433397443204184 ^ 0.7182944373783682<=scoreProtTaxo<=0.9403608156667465 ^ 7.247323472250873E-5<=scorePageRankTopoDiv<=9.936154209859977E-5 (14)  
class BIOSYNTHESIS IF : 0.6324555320336759<=scoreRea<=1.224744871391589 ^ 122.60072594474337<=scoreProtTaxo<=200.61081401361804 ^ 2.9188234495044796E-4<=scorePageRankTopoDiv<=3.3305101431035033E-4 (17)  
class BIOSYNTHESIS IF : 0.18257418583505536<=scoreRea<=0.2041241452319315 ^ 14.689588149434279<=scoreProtTaxo<=29.97574019102781 ^ 4.0274853010570464E-5<=scorePageRankTopoDiv<=4.312415052681157E-5 (9)  
class BIOSYNTHESIS IF : 1.23418791690791<=scoreRea<=1.3113263207824053 ^ 0.06597101090331349<=scoreProtTaxo<=0.3271897037728704 ^ 8.513140588286736E-5<=scorePageRankTopoDiv<=1.0676933935888684E-4 (9)  
class DEGRADATION IF : 0.09166984970282113<=scoreRea<=0.11065666703449763 ^ 8.256138978357354<=scoreProtTaxo<=12.978394627069473 ^ 4.006361468932858E-5<=scorePageRankTopoDiv<=4.0878463928647076E-5 (5)  
class BIOSYNTHESIS IF : 0.8528028654224418<=scoreRea<=1.9094065395649336 ^ 40.57530437366926<=scoreProtTaxo<=108.87019465254258 ^ 7.171085307698987E-5<=scorePageRankTopoDiv<=7.423092402198566E-5 (14)  
class BIOSYNTHESIS IF : 0.40451991747794525<=scoreRea<=0.5 ^ 115.83158598876034<=scoreProtTaxo<=207.2058350485641 ^ 7.608576765126553E-5<=scorePageRankTopoDiv<=1.0389569195115525E-4 (29)  
class BIOSYNTHESIS IF : 1.0<=scoreRea<=1.4142135623730951 ^ 3.8990465632701667<=scoreProtTaxo<=10.098108594172102 ^ 1.9631626055723037E-4<=scorePageRankTopoDiv<=3.1452413833726796E-4 (22)  
class BIOSYNTHESIS IF : 1.0<=scoreRea<=2.390457218668787 ^ 49.98394804062424<=scoreProtTaxo<=64.39521773703277 ^ 4.2983140265073273E-4<=scorePageRankTopoDiv<=6.314128497589322E-4 (27)  
class BIOSYNTHESIS IF : 0.5773502691896257<=scoreRea<=0.6324555320336759 ^ 541.6808091786036<=scoreProtTaxo<=768.5042916331304 ^ 1.5393073014984863E-4<=scorePageRankTopoDiv<=1.886876260565613E-4 (5)  
class DETOX IF : scoreRea=1.0 ^ 377.5158590055317<=scoreProtTaxo<=491.60960120855555 ^ 4.210951572447113E-4<=scorePageRankTopoDiv<=4.456494538717275E-4 (8)  
class DEGRADATION IF : scoreRea=0.6546536707079771 ^ scoreProtTaxo=0.0 ^ scorePageRankTopoDiv=9.671766544956472E-5 (1)  
class DEGRADATION IF : scoreRea=0.5 ^ scoreProtTaxo=0.0 ^ 1.0859097090239445E-4<=scorePageRankTopoDiv<=1.7901793321744563E-4 (14)  
class DEGRADATION IF : 0.692820323027551<=scoreRea<=0.7071067811865476 ^ scoreProtTaxo=0.0 ^ 1.072557301339922E-4<=scorePageRankTopoDiv<=1.131934522697916E-4 (6)  
class DEGRADATION IF : 0.5773502691896257<=scoreRea<=0.7071067811865476 ^ 80.70483034769947<=scoreProtTaxo<=119.06929966952241 ^ 8.838725777845112E-5<=scorePageRankTopoDiv<=9.297206458788736E-5 (4)  
class DEGRADATION IF : scoreRea=0.6546536707079771 ^ scoreProtTaxo=0.0 ^ scorePageRankTopoDiv=8.766640028603569E-5 (5)  
class DEGRADATION IF : scoreRea=0.7071067811865476 ^ scoreProtTaxo=0.0 ^ scorePageRankTopoDiv=9.757823187181929E-5 (2)  
class DEGRADATION IF : 0.6324555320336759<=scoreRea<=0.6340037731068526 ^ 0.893383640077447<=scoreProtTaxo<=3.50222811304394 ^ 8.188483602428256E-5<=scorePageRankTopoDiv<=9.560425960465856E-5 (6)  
class DEGRADATION IF : scoreRea=0.6546536707079771 ^ scoreProtTaxo=0.0 ^ scorePageRankTopoDiv=9.671766544956472E-5 (1)  
class DEGRADATION IF : scoreRea=0.6546536707079771 ^ scoreProtTaxo=0.0 ^ scorePageRankTopoDiv=9.671766544956472E-5 (1)  
class DEGRADATION IF : scoreRea=0.6546536707079771 ^ scoreProtTaxo=0.0 ^ scorePageRankTopoDiv=9.671766544956472E-5 (1)  
class DEGRADATION IF : scoreRea=0.6546536707079771 ^ scoreProtTaxo=0.0 ^ scorePageRankTopoDiv=9.671766544956472E-5 (1)  
class DEGRADATION IF : scoreRea=0.6546536707079771 ^ scoreProtTaxo=0.0 ^ scorePageRankTopoDiv=9.671766544956472E-5 (1)  
class DEGRADATION IF : scoreRea=0.6546536707079771 ^ scoreProtTaxo=0.0 ^ scorePageRankTopoDiv=9.671766544956472E-5 (1)  
class ENERGY IF : scoreRea=0.380058475033046 ^ scoreProtTaxo=0.010500103322752346 ^ scorePageRankTopoDiv=8.047646361772154E-5 (4)  
class BIOSYNTHESIS IF : 1.0954451150103324<=scoreRea<=1.4142135623730951 ^ 70.22530852940199<=scoreProtTaxo<=244.7833036744955 ^ 1.4704044926818562E-4<=scorePageRankTopoDiv<=2.4042379903186468E-4 (94)  
class BIOSYNTHESIS IF : scoreRea=1.0 ^ 138.75068644666334<=scoreProtTaxo<=144.39855030102657 ^ 8.670863232003228E-5<=scorePageRankTopoDiv<=9.025333891358375E-5 (5)  
class BIOSYNTHESIS IF : 1.0<=scoreRea<=1.0327955589886444 ^ 30.727284397150104<=scoreProtTaxo<=129.72023262904227 ^ 9.184702952142395E-5<=scorePageRankTopoDiv<=9.207609793394737E-5 (18)  
class DETOX IF : 1.1547005383792515<=scoreRea<=1.2374368670764582 ^ 79.79045207230868<=scoreProtTaxo<=103.88592820586676 ^ 2.9939658600643723E-4<=scorePageRankTopoDiv<=3.192543023177126E-4 (10)  
class BIOSYNTHESIS IF : scoreRea=0.7071067811865476 ^ scoreProtTaxo=0.0 ^ 8.00447471683044E-5<=scorePageRankTopoDiv<=9.744629831611159E-5 (31)  
class ENERGY IF : scoreRea=0.7071067811865476 ^ scoreProtTaxo=0.0 ^ scorePageRankTopoDiv=2.0800095601150362E-4 (4)  
class BIOSYNTHESIS IF : 0.8451542547285166<=scoreRea<=0.8498365855987975 ^ 0.01636590949191017<=scoreProtTaxo<=132.37326865320478 ^ 5.50176610343286E-5<=scorePageRankTopoDiv<=5.878118824107198E-5 (9)  
class BIOSYNTHESIS IF : 1.1547005383792515<=scoreRea<=1.2018504251546631 ^ scoreProtTaxo=0.0 ^ 1.3380877114798815E-4<=scorePageRankTopoDiv<=1.92725864781061E-4 (22)  
class BIOSYNTHESIS IF : 1.1514524291646675<=scoreRea<=1.766966877363964 ^ 2.735928597404479<=scoreProtTaxo<=3.227339672091711 ^ 9.279920632191633E-5<=scorePageRankTopoDiv<=1.5383984974384253E-4 (13)  
class BIOSYNTHESIS IF : scoreRea=1.0 ^ 47.56580340961178<=scoreProtTaxo<=65.97520195284082 ^ 2.246824997052055E-4<=scorePageRankTopoDiv<=2.631955395236231E-4 (17)  
class DEGRADATION IF : scoreRea=1.0 ^ scoreProtTaxo=0.0 ^ 3.041377624978212E-4<=scorePageRankTopoDiv<=3.298008762231907E-4 (14)  
class BIOSYNTHESIS IF : 0.816496580927726<=scoreRea<=2.14201664188625 ^ 15.742075762667008<=scoreProtTaxo<=86.84275672670222 ^ 9.077163834529936E-5<=scorePageRankTopoDiv<=9.118516690309108E-5 (11)  
class DEGRADATION IF : 0.8041247051007595<=scoreRea<=0.816496580927726 ^ 0.0<=scoreProtTaxo<=0.5190213244719686 ^ 1.1821542163722823E-4<=scorePageRankTopoDiv<=1.2267757994319142E-4 (16)  
class DEGRADATION IF : 0.6009252125773316<=scoreRea<=0.7071067811865476 ^ 21.637137435383995<=scoreProtTaxo<=34.47987352068098 ^ 7.300051546818665E-5<=scorePageRankTopoDiv<=7.991160054209813E-5 (14)

class DEGRADATION IF : 0.8966167345234256<=scoreRea<=1.4142135623730951 ^ 2.4095196561177734<=scoreProtTaxo<=6.510136530437825 ^ 1.844630092358027E-4<=scorePageRankTopoDiv<=1.9559114106102574E-4 (8)

class DEGRADATION IF : scoreRea=1.854955583040673 ^ scoreProtTaxo=1.1895184214110706 ^ scorePageRankTopoDiv=1.9876999520340293E-4 (3)

class DEGRADATION IF : scoreRea=1.0 ^ scoreProtTaxo=0.0 ^ 2.0021218094743186E-4<=scorePageRankTopoDiv<=2.014356600793569E-4 (6)

class DEGRADATION IF : scoreRea=1.224744871391589 ^ scoreProtTaxo=0.0 ^ 1.4558263294901127E-4<=scorePageRankTopoDiv<=1.6056093176895363E-4 (4)

class DEGRADATION IF : scoreRea=1.0 ^ scoreProtTaxo=35.474289812226985 ^ scorePageRankTopoDiv=1.708260808783563E-4 (4)

class DEGRADATION IF : scoreRea=1.0 ^ scoreProtTaxo=0.0 ^ scorePageRankTopoDiv=1.9567744754793968E-4 (4)

class DEGRADATION IF : scoreRea=1.0 ^ scoreProtTaxo=0.0 ^ 1.6993287011232575E-4<=scorePageRankTopoDiv<=1.7453643114258828E-4 (9)

class DEGRADATION IF : scoreRea=1.0 ^ scoreProtTaxo=0.0 ^ scorePageRankTopoDiv=1.8935139453691235E-4 (3)

class DEGRADATION IF : scoreRea=1.0 ^ scoreProtTaxo=0.0 ^ 1.796932685997016E-4<=scorePageRankTopoDiv<=1.8150128145194246E-4 (9)

class DEGRADATION IF : scoreRea=1.4142135623730951 ^ scoreProtTaxo=0.0 ^ 1.5263370408995772E-4<=scorePageRankTopoDiv<=1.6334478940908766E-4 (9)

class DEGRADATION IF : 1.713913650100261<=scoreRea<=2.0 ^ 6.790781028238273<=scoreProtTaxo<=7.123150982108755 ^ 1.8279934571149197E-4<=scorePageRankTopoDiv<=2.2805075653909617E-4 (11)

class DEGRADATION IF : scoreRea=1.4142135623730951 ^ scoreProtTaxo=0.0 ^ scorePageRankTopoDiv=1.7016811839786362E-4 (4)

class DEGRADATION IF : 1.0<=scoreRea<=1.2649110640673518 ^ 67.41088419467627<=scoreProtTaxo<=69.59562376658221 ^ 1.8621323435720702E-4<=scorePageRankTopoDiv<=1.8902202999632244E-4 (5)

class DEGRADATION IF : 1.224744871391589<=scoreRea<=1.2747548783981961 ^ scoreProtTaxo=0.0 ^ 1.7356471165330003E-4<=scorePageRankTopoDiv<=1.869441828479762E-4 (12)

class DEGRADATION IF : scoreRea=1.0954451150103324 ^ 102.16537911750638<=scoreProtTaxo<=119.36925641394684 ^ 1.1655246691256629E-4<=scorePageRankTopoDiv<=1.2415402697963014E-4 (4)

class DEGRADATION IF : scoreRea=1.0 ^ scoreProtTaxo=0.0 ^ scorePageRankTopoDiv=2.2488847230861333E-4 (2)

class BIOSYNTHESIS IF : scoreRea=1.0 ^ 203.22660501475306<=scoreProtTaxo<=497.4811236160592 ^ scorePageRankTopoDiv=9.184702952142395E-5 (15)

class DEGRADATION IF : scoreRea=0.7071067811865476 ^ scoreProtTaxo=0.0 ^ scorePageRankTopoDiv=1.6567412817495268E-4 (5)

class BIOSYNTHESIS IF : 0.31622776601683794<=scoreRea<=0.4714045207910317 ^ 78.57142496387931<=scoreProtTaxo<=107.58985969873252 ^ 3.8284518337852805E-5<=scorePageRankTopoDiv<=4.917246794022648E-5 (37)

class BIOSYNTHESIS IF : 1.1881770515720091<=scoreRea<=1.224744871391589 ^ scoreProtTaxo=0.0 ^ 9.421736842897945E-5<=scorePageRankTopoDiv<=1.1442075717380128E-4 (10)

class DEGRADATION IF : scoreRea=1.0 ^ scoreProtTaxo=0.0 ^ scorePageRankTopoDiv=4.574313867155294E-4 (2)

class BIOSYNTHESIS IF : 0.34050261230349943<=scoreRea<=0.7977240352174656 ^ 3.0602949519508496<=scoreProtTaxo<=10.185522301794693 ^ 1.715229030060865E-5<=scorePageRankTopoDiv<=3.147447837678314E-5 (22)

class ENERGY IF : 0.14744195615489714<=scoreRea<=0.32732683535398854 ^ 1.0121983138172692<=scoreProtTaxo<=1.9978761838910137 ^ 1.2608413347989437E-4<=scorePageRankTopoDiv<=1.890485460452404E-4 (11)

class BIOSYNTHESIS IF : scoreRea=1.4960909156069733 ^ scoreProtTaxo=0.13138491890319684 ^ scorePageRankTopoDiv=1.0996690323666944E-4 (4)

class BIOSYNTHESIS IF : 0.8498365855987975<=scoreRea<=1.0741723110591495 ^ 0.3514065322154995<=scoreProtTaxo<=0.49235956602335174 ^ 8.767676776912525E-5<=scorePageRankTopoDiv<=1.3469499829656941E-4 (18)

class DEGRADATION IF : 0.1666666666666666<=scoreRea<=0.3535533905932738 ^ 120.44252652744328<=scoreProtTaxo<=169.67173104287173 ^ 9.357090688646382E-5<=scorePageRankTopoDiv<=1.008230936271939E-4 (7)

class BIOSYNTHESIS IF : 0.8660254037844386<=scoreRea<=1.2649110640673518 ^ 683.722406473152<=scoreProtTaxo<=2285.021645022659 ^ 9.184702952142395E-5<=scorePageRankTopoDiv<=3.3611575163561925E-4 (43)

class BIOSYNTHESIS IF : 0.9274777915203366<=scoreRea<=1.0954451150103324 ^ 0.0<=scoreProtTaxo<=0.3136103074603237 ^ 8.476168618352132E-5<=scorePageRankTopoDiv<=8.770529561401202E-5 (22)

class BIOSYNTHESIS IF : 0.7001400420140049<=scoreRea<=0.7745966692414834 ^ 0.0<=scoreProtTaxo<=0.011411785960777153 ^ 1.1399210988284985E-4<=scorePageRankTopoDiv<=1.2369853738259412E-4 (38)

class BIOSYNTHESIS IF : 0.8498365855987975<=scoreRea<=0.9274777915203366 ^ 0.0<=scoreProtTaxo<=0.17684850252398204 ^ 1.1884249895025044E-4<=scorePageRankTopoDiv<=1.336146798704194E-4 (11)

class DEGRADATION IF : 1.889822365046136<=scoreRea<=2.0 ^ scoreProtTaxo=0.0 ^ 1.2475533424711406E-4<=scorePageRankTopoDiv<=1.280016077304211E-4 (2)

class BIOSYNTHESIS IF : 0.31622776601683794<=scoreRea<=0.6183469424008422 ^ 10.926420578880442<=scoreProtTaxo<=12.156635704251286 ^ 2.5481468240134802E-5<=scorePageRankTopoDiv<=3.212687966439753E-5 (13)

class BIOSYNTHESIS IF : scoreRea=1.4142135623730951 ^ scoreProtTaxo=0.0 ^ 9.184702952142395E-5<=scorePageRankTopoDiv<=1.0101442288769912E-4 (5)

class BIOSYNTHESIS IF : scoreRea=1.4142135623730951 ^ scoreProtTaxo=35.24228074716164 ^ scorePageRankTopoDiv=9.184702952142395E-5 (5)

class BIOSYNTHESIS IF : scoreRea=1.3981241472851111 ^ scoreProtTaxo=21.378116572226567 ^ scorePageRankTopoDiv=9.381569842146049E-5 (2)

class BIOSYNTHESIS IF : 0.11826247919781653<=scoreRea<=2.0225995873897267 ^ 10.776152121488197<=scoreProtTaxo<=105.49746842477356 ^ 9.396036002192474E-5<=scorePageRankTopoDiv<=9.557427168280585E-5 (19)

class BIOSYNTHESIS IF : 0.4472135954999579<=scoreRea<=1.651445647689541 ^ 15.874507866387544<=scoreProtTaxo<=80.22722087675474 ^ 8.395834738030331E-5<=scorePageRankTopoDiv<=9.05851900355019E-5 (56)

class DEGRADATION IF : scoreRea=1.2747548783981961 ^ scoreProtTaxo=0.0 ^ scorePageRankTopoDiv=1.0154910594416097E-4 (4)

class BIOSYNTHESIS IF : 0.5773502691896257<=scoreRea<=1.0 ^ 202.1185360063624<=scoreProtTaxo<=212.76058532225056 ^ 4.679126315010273E-5<=scorePageRankTopoDiv<=6.290816188871419E-5 (10)

class BIOSYNTHESIS IF : 0.2231780211373287<=scoreRea<=0.5686020318963798 ^ 0.7364232486787674<=scoreProtTaxo<=131.3492737973759 ^ 5.735621962844952E-5<=scorePageRankTopoDiv<=5.839220869253309E-5 (29)

class DEGRADATION IF : 0.7453559924999298<=scoreRea<=0.7453559924999299 ^ 38.17176001418311<=scoreProtTaxo<=42.46577637766384 ^ 5.201708028526716E-5<=scorePageRankTopoDiv<=6.246401784808223E-5 (7)

class BIOSYNTHESIS IF : scoreRea=1.0 ^ 105.5777543909937<=scoreProtTaxo<=196.07813179808738 ^ 1.695742324714891E-4<=scorePageRankTopoDiv<=2.0341900322563264E-4 (17)

class DEGRADATION IF : 0.23570226039551584<=scoreRea<=0.2581988897471611 ^ 0.0<=scoreProtTaxo<=15.067688831635602 ^ 1.1838338946480182E-4<=scorePageRankTopoDiv<=1.2540296301974467E-4 (11)

class BIOSYNTHESIS IF : scoreRea=0.08770580193070292 ^ scoreProtTaxo=0.0 ^ scorePageRankTopoDiv=1.0377721218307198E-4 (4)

class OTHER IF : scoreRea=1.7320508075688772 ^ scoreProtTaxo=113.37384803240559 ^ scorePageRankTopoDiv=9.025333891358375E-5 (2)

class BIOSYNTHESIS IF : scoreRea=0.4472135954999579 ^ scoreProtTaxo=0.0 ^ 8.060115160269311E-5<=scorePageRankTopoDiv<=9.008636540561074E-5 (7)  
class DEGRADATION IF : scoreRea=1.0 ^ 459.13672922216<=scoreProtTaxo<=481.6843064871512 ^ 1.7909922888682906E-4<=scorePageRankTopoDiv<=3.40464408328133E-4 (6)  
class BIOSYNTHESIS IF : 1.8257418583505536<=scoreRea<=3.265986323710904 ^ 33.12248386674865<=scoreProtTaxo<=136.42726041965906 ^ 2.1269607686288917E-4<=scorePageRankTopoDiv<=2.3234515563282242E-4 (20)  
class BIOSYNTHESIS IF : 0.7745966692414834<=scoreRea<=0.8177595307636584 ^ 0.0<=scoreProtTaxo<=2.037106752619959 ^ 5.453708571594084E-5<=scorePageRankTopoDiv<=5.7664954295475665E-5 (10)  
class ENERGY IF : 0.08099238707340584<=scoreRea<=0.14201432049934526 ^ 22.740488618689128<=scoreProtTaxo<=74.32767683331349 ^ 3.515238536038338E-5<=scorePageRankTopoDiv<=4.331378370561842E-5 (32)  
class ENERGY IF : 0.4714045207910317<=scoreRea<=0.7071067811865476 ^ 5.131234358813483<=scoreProtTaxo<=6.047393765526435 ^ 7.701995272183148E-5<=scorePageRankTopoDiv<=1.2947129383306984E-4 (14)  
class ENERGY IF : 0.1851640199545103<=scoreRea<=0.21908902300206645 ^ 1.0815175480053552<=scoreProtTaxo<=1.3687047831034047 ^ 3.912445526789275E-5<=scorePageRankTopoDiv<=4.770101382830417E-5 (7)  
class ENERGY IF : scoreRea=0.23735633163877065 ^ scoreProtTaxo=8.146624267430086 ^ scorePageRankTopoDiv=7.71820203608201E-5 (2)  
class ENERGY IF : 0.14638501094227999<=scoreRea<=0.3039305703971088 ^ 0.005236462280125203<=scoreProtTaxo<=0.041096692455940075 ^ 7.542658385848098E-5<=scorePageRankTopoDiv<=8.811181365903088E-5 (9)  
class ENERGY IF : scoreRea=0.24618298195866548 ^ scoreProtTaxo=5.306184827620615 ^ scorePageRankTopoDiv=5.09704620784785E-5 (8)  
class ENERGY IF : 0.16666666666666666<=scoreRea<=0.20701966780270625 ^ 0.058119499839866515<=scoreProtTaxo<=0.16287691064839444 ^ 7.259786429147831E-5<=scorePageRankTopoDiv<=1.0666929785613536E-4 (15)  
class ENERGY IF : scoreRea=0.37399695868987537 ^ scoreProtTaxo=2.176539670611231 ^ scorePageRankTopoDiv=6.928775513126102E-5 (3)  
class ENERGY IF : 0.39749048208014426<=scoreRea<=0.49065338146265813 ^ 0.01202320036306871<=scoreProtTaxo<=0.7345465850667467 ^ 6.0236816739474416E-5<=scorePageRankTopoDiv<=6.0598885144221155E-5 (8)  
class ENERGY IF : scoreRea=0.3370999312316211 ^ scoreProtTaxo=0.0 ^ scorePageRankTopoDiv=6.778651896076734E-5 (4)  
class ENERGY IF : scoreRea=0.19364916731037085 ^ scoreProtTaxo=4.743266578047228 ^ scorePageRankTopoDiv=6.766148967933868E-5 (2)  
class ENERGY IF : scoreRea=0.2683281572999748 ^ scoreProtTaxo=1.3245830702395656 ^ scorePageRankTopoDiv=5.84215720463948E-5 (4)  
class ENERGY IF : 0.14285714285714285<=scoreRea<=0.21320071635561044 ^ 0.4767035715081458<=scoreProtTaxo<=0.7353385010338678 ^ 6.663890312950396E-5<=scorePageRankTopoDiv<=9.013481199149459E-5 (6)  
class ENERGY IF : scoreRea=0.20100756305184242 ^ scoreProtTaxo=0.0 ^ scorePageRankTopoDiv=6.164581976670261E-5 (2)  
class ENERGY IF : 0.11826247919781653<=scoreRea<=0.1889822365046136 ^ 35.1112974762364<=scoreProtTaxo<=84.87073599036444 ^ 6.42247008249192E-5<=scorePageRankTopoDiv<=8.08551988877341E-5 (29)  
class ENERGY IF : 0.18569533817705186<=scoreRea<=0.20788767860257112 ^ 14.185160517004936<=scoreProtTaxo<=56.017774202359035 ^ 5.557479307499183E-5<=scorePageRankTopoDiv<=6.377510375064118E-5 (7)  
class BIOSYNTHESIS IF : scoreRea=0.24743582965269675 ^ scoreProtTaxo=45.577594029084196 ^ scorePageRankTopoDiv=6.303181454151838E-5 (4)  
class DEGRADATION IF : 0.7071067811865476<=scoreRea<=1.0 ^ 333.2922381910363<=scoreProtTaxo<=335.05701833979776 ^ 1.2080198612630699E-4<=scorePageRankTopoDiv<=1.4530708930785835E-4 (9)  
class DEGRADATION IF : 1.0<=scoreRea<=1.0954451150103321 ^ 54.927732910784854<=scoreProtTaxo<=69.7429349678668 ^ 1.0547963298888047E-4<=scorePageRankTopoDiv<=1.1900372627817683E-4 (6)  
class DEGRADATION IF : scoreRea=0.5 ^ scoreProtTaxo=71.88664045309517 ^ scorePageRankTopoDiv=5.046510182258221E-5 (5)  
class OTHER IF : scoreRea=1.0 ^ scoreProtTaxo=0.0 ^ scorePageRankTopoDiv=1.2181717835020451E-4 (3)  
class BIOSYNTHESIS IF : 0.4330127018922193<=scoreRea<=0.7071067811865476 ^ 2.368391006896105<=scoreProtTaxo<=45.87562987521707 ^ 3.4589070071606805E-5<=scorePageRankTopoDiv<=3.918752838690245E-5 (21)  
class DEGRADATION IF : scoreRea=0.5773502691896257 ^ 16.241979271931093<=scoreProtTaxo<=16.967711271902253 ^ 1.3994040384206641E-4<=scorePageRankTopoDiv<=1.4353561834606595E-4 (9)  
class DEGRADATION IF : 0.5773502691896257<=scoreRea<=0.7071067811865476 ^ 53.1394565838685<=scoreProtTaxo<=156.685537438235 ^ 1.7250657726510578E-4<=scorePageRankTopoDiv<=1.7700450746818247E-4 (11)  
class BIOSYNTHESIS IF : 0.816496580927726<=scoreRea<=0.8563488385776752 ^ scoreProtTaxo=0.0 ^ 1.1588081705557356E-4<=scorePageRankTopoDiv<=1.1676393832346643E-4 (9)  
class BIOSYNTHESIS IF : 0.8660254037844386<=scoreRea<=1.0 ^ 55.5178349721961<=scoreProtTaxo<=165.08662498808434 ^ 1.1966643069700278E-4<=scorePageRankTopoDiv<=1.276882886463082E-4 (12)  
class BIOSYNTHESIS IF : 1.5491933384829668<=scoreRea<=3.7416573867739413 ^ 103.17385445279729<=scoreProtTaxo<=1032.1323526036228 ^ 1.6550584019747294E-4<=scorePageRankTopoDiv<=2.0794659757250114E-4 (35)  
class DEGRADATION IF : 0.09421114395319916<=scoreRea<=0.2401922307076307 ^ 105.54140231826986<=scoreProtTaxo<=158.4040314229278 ^ 1.85814553170896E-5<=scorePageRankTopoDiv<=4.761594272264702E-5 (16)  
class BIOSYNTHESIS IF : 0.816496580927726<=scoreRea<=2.6111648393354674 ^ 0.0<=scoreProtTaxo<=207.6349165468604 ^ 4.100990388848989E-4<=scorePageRankTopoDiv<=4.219107144029883E-4 (32)  
class OTHER IF : 0.15075567228888181<=scoreRea<=0.2041241452319315 ^ 7.058491402900568<=scoreProtTaxo<=24.85219968434863 ^ 7.863745812978191E-5<=scorePageRankTopoDiv<=9.135602271849298E-5 (3)  
class DEGRADATION IF : 0.816496580927726<=scoreRea<=0.8320502943378437 ^ 54.93483103796865<=scoreProtTaxo<=159.97631877899414 ^ 1.7376808566874698E-4<=scorePageRankTopoDiv<=1.8198932974737E-4 (20)  
class BIOSYNTHESIS IF : 0.5720775535473553<=scoreRea<=1.6858544608470492 ^ 1.2185788425532535<=scoreProtTaxo<=1.254188385269777 ^ 1.3565745805312304E-4<=scorePageRankTopoDiv<=1.5188589615391725E-4 (16)  
class BIOSYNTHESIS IF : 0.30151134457776363<=scoreRea<=0.48507125007266594 ^ 43.97644267557982<=scoreProtTaxo<=237.94152843872973 ^ 1.5181458419799012E-4<=scorePageRankTopoDiv<=1.622561555051185E-4 (24)  
class OTHER IF : scoreRea=0.2773500981126146 ^ scoreProtTaxo=10.349540531628243 ^ scorePageRankTopoDiv=4.731675223938819E-5 (7)  
class BIOSYNTHESIS IF : scoreRea=1.1677484162422844 ^ scoreProtTaxo=10.279653168918027E-5 (5)  
class DEGRADATION IF : 0.18257418583505536<=scoreRea<=0.258198889741611 ^ 20.29655143121609<=scoreProtTaxo<=27.408620731817063 ^ 6.379348993329522E-5<=scorePageRankTopoDiv<=6.679800841717476E-5 (11)  
class BIOSYNTHESIS IF : 0.4264014327112209<=scoreRea<=0.42857142857142855 ^ 0.0<=scoreProtTaxo<=16.493671914133294 ^ 1.3819175744626106E-4<=scorePageRankTopoDiv<=1.5471251659915627E-4 (9)

class BIOSYNTHESIS IF : scoreRea=0.3535533905932738 ^ scoreProtTaxo=22.65668793082446 ^ scorePageRankTopoDiv=1.6950971007434574E-4 (13)  
class OTHER IF : scoreRea=0.816496580927726 ^ scoreProtTaxo=109.62502934472009 ^ scorePageRankTopoDiv=3.6792614690010723E-4 (4)  
class ENERGY IF : 0.31622776601683794<=scoreRea<=0.32714432804381227 ^ 0.6004119665829322<=scoreProtTaxo<=4.484080035378623 ^ 3.226244283908063E-  
5<=scorePageRankTopoDiv<=3.72149218380753E-5 (9)  
class DEGRADATION IF : 0.07147416898918632<=scoreRea<=0.5052911526399113 ^ scoreProtTaxo=0.0 ^ 1.7203438390870207E-5<=scorePageRankTopoDiv<=2.2300141489819972E-5  
(22)  
class OTHER IF : scoreRea=1.0 ^ 294.5535714285243<=scoreProtTaxo<=325.270349094411 ^ 2.0341900322563264E-4<=scorePageRankTopoDiv<=2.0507683798991577E-4 (10)  
class BIOSYNTHESIS IF : 1.1952286093343936<=scoreRea<=1.61245154965971 ^ 0.16194510804587167<=scoreProtTaxo<=54.44846840950304 ^ 3.3376497294104843E-  
4<=scorePageRankTopoDiv<=3.5209617300788025E-4 (15)  
class BIOSYNTHESIS IF : 0.18257418583505536<=scoreRea<=0.2041241452319315 ^ 0.7532020994315557<=scoreProtTaxo<=32.6965054097352 ^ 2.312808880264647E-  
5<=scorePageRankTopoDiv<=3.4896462935919714E-5 (23)  
class BIOSYNTHESIS IF : 1.0954451150103321<=scoreRea<=1.0954451150103324 ^ scoreProtTaxo=47.31651754796645 ^ scorePageRankTopoDiv=1.1230007606831941E-4 (5)  
class BIOSYNTHESIS IF : 0.3535533905932738<=scoreRea<=1.0 ^ 35.772357723564<=scoreProtTaxo<=322.6091560103118 ^ 1.3198585967944532E-  
4<=scorePageRankTopoDiv<=1.3306746816423162E-4 (18)  
class BIOSYNTHESIS IF : scoreRea=0.7071067811865476 ^ scoreProtTaxo=0.0 ^ 1.293202030337335E-4<=scorePageRankTopoDiv<=1.333663591583185E-4 (14)  
class BIOSYNTHESIS IF : 0.7071067811865476<=scoreRea<=0.8451542547285166 ^ 9.263985137001498<=scoreProtTaxo<=24.028327953004528 ^ 2.136764660064425E-  
4<=scorePageRankTopoDiv<=2.5281930371988685E-4 (9)  
class BIOSYNTHESIS IF : 0.23570226039551584<=scoreRea<=0.25 ^ 0.0<=scoreProtTaxo<=0.8988650644845613 ^ 1.071197779640557E-  
4<=scorePageRankTopoDiv<=1.1719969391414448E-4 (7)  
class DEGRADATION IF : 0.04879500364742666<=scoreRea<=0.09258200997725514 ^ 25.472692692038926<=scoreProtTaxo<=108.39077309645593 ^ 1.806864911473614E-  
5<=scorePageRankTopoDiv<=2.7793795106385645E-5 (25)  
class OTHER IF : 0.8528028654224418<=scoreRea<=1.0 ^ 10.482301979492092<=scoreProtTaxo<=28.17578747790379 ^ 9.184702952142395E-  
5<=scorePageRankTopoDiv<=9.351198002934252E-5 (11)  
class BIOSYNTHESIS IF : 0.5773502691896257<=scoreRea<=0.7071067811865476 ^ 0.0<=scoreProtTaxo<=30.48079304932964 ^ 5.3154500055403816E-  
5<=scorePageRankTopoDiv<=5.5882189113535004E-5 (15)  
class BIOSYNTHESIS IF : 0.6793662204867574<=scoreRea<=0.775791113542719 ^ 0.0<=scoreProtTaxo<=0.0709936559865042 ^ 1.3585363833144514E-  
4<=scorePageRankTopoDiv<=1.419800023207035E-4 (24)  
class BIOSYNTHESIS IF : scoreRea=1.0 ^ scoreProtTaxo=0.0 ^ 1.33480015484179E-4<=scorePageRankTopoDiv<=1.3671629379591788E-4 (8)  
class BIOSYNTHESIS IF : scoreRea=1.0 ^ scoreProtTaxo=0.0 ^ 1.6552917690418017E-4<=scorePageRankTopoDiv<=1.6968382380836306E-4 (15)  
class BIOSYNTHESIS IF : 0.7071067811865476<=scoreRea<=0.816496580927726 ^ 78.02205121755242<=scoreProtTaxo<=310.4692444030603 ^ 1.4006546779844433E-  
4<=scorePageRankTopoDiv<=1.5967022554404776E-4 (10)  
class BIOSYNTHESIS IF : scoreRea=1.0 ^ scoreProtTaxo=27.6271696741116 ^ scorePageRankTopoDiv=1.630244314637863E-4 (4)  
class BIOSYNTHESIS IF : 0.8498365855987975<=scoreRea<=0.8819171036881968 ^ 0.0<=scoreProtTaxo<=0.02987286337893175 ^ 1.6014420706100203E-  
4<=scorePageRankTopoDiv<=1.7597335020488872E-4 (6)  
class BIOSYNTHESIS IF : scoreRea=1.0 ^ scoreProtTaxo=0.0 ^ scorePageRankTopoDiv=1.413963764486109E-4 (1)  
class BIOSYNTHESIS IF : 0.7071067811865476<=scoreRea<=0.816496580927726 ^ 3.6899216336007026<=scoreProtTaxo<=4.0834889947534485 ^ 8.267082416947604E-  
5<=scorePageRankTopoDiv<=2.7107121994508987E-4 (7)  
class BIOSYNTHESIS IF : scoreRea=1.0 ^ scoreProtTaxo=0.0 ^ 1.4183238468692228E-4<=scorePageRankTopoDiv<=1.4208373799633385E-4 (7)  
class BIOSYNTHESIS IF : 0.6123724356957945<=scoreRea<=0.8498365855987975 ^ 2.1684886029206134<=scoreProtTaxo<=2.2017607556010725 ^ 1.518898979278972E-  
4<=scorePageRankTopoDiv<=2.6238879696150873E-4 (7)  
class BIOSYNTHESIS IF : scoreRea=0.8660254037844386 ^ scoreProtTaxo=0.0 ^ 1.4138985419279236E-4<=scorePageRankTopoDiv<=1.5691800610686908E-4 (16)  
class BIOSYNTHESIS IF : scoreRea=1.0 ^ scoreProtTaxo=0.0 ^ 1.426170215875551E-4<=scorePageRankTopoDiv<=1.4491894953559909E-4 (6)  
class BIOSYNTHESIS IF : 0.7071067811865476<=scoreRea<=1.0 ^ scoreProtTaxo=0.0 ^ 1.570005579549546E-4<=scorePageRankTopoDiv<=1.5739447872831032E-4 (8)  
class BIOSYNTHESIS IF : 0.8660254037844386<=scoreRea<=1.0 ^ 12.33487673829909<=scoreProtTaxo<=220.12790894432126 ^ 1.4036841679306012E-  
4<=scorePageRankTopoDiv<=1.60770434204676E-4 (27)  
class DEGRADATION IF : 0.7001400420140049<=scoreRea<=0.9309493362512627 ^ 12.36247558554131<=scoreProtTaxo<=116.8689224308081 ^ 1.1254972809590294E-  
4<=scorePageRankTopoDiv<=1.1715656138055222E-4 (34)  
class DEGRADATION IF : 0.3723646897664626<=scoreRea<=0.5345224838248488 ^ scoreProtTaxo=0.0 ^ 5.9327432063423745E-5<=scorePageRankTopoDiv<=6.385494276414651E-5  
(19)  
class OTHER IF : scoreRea=0.7071067811865476 ^ scoreProtTaxo=0.0 ^ scorePageRankTopoDiv=5.673579070415349E-5 (1)  
class OTHER IF : scoreRea=0.18156825980064073 ^ scoreProtTaxo=21.804187367254194 ^ scorePageRankTopoDiv=4.6880309815237896E-5 (2)  
class OTHER IF : scoreRea=1.0801234497346432 ^ scoreProtTaxo=80.10792330008738 ^ scorePageRankTopoDiv=7.039467061986714E-5 (1)  
class OTHER IF : scoreRea=0.5 ^ scoreProtTaxo=193.6710726321274 ^ scorePageRankTopoDiv=5.787400974552743E-5 (9)  
class OTHER IF : scoreRea=0.4472135954999579 ^ scoreProtTaxo=0.0 ^ scorePageRankTopoDiv=7.735966100425115E-5 (3)  
class OTHER IF : 0.3396831102433787<=scoreRea<=0.3922322702763681 ^ 36.03337000244279<=scoreProtTaxo<=64.44969605773143 ^ 3.8086671000353744E-  
5<=scorePageRankTopoDiv<=3.8884620735136614E-5 (7)  
class OTHER IF : scoreRea=0.6590820436573076 ^ scoreProtTaxo=16.279956356046515 ^ scorePageRankTopoDiv=7.885620403142671E-5 (1)  
class OTHER IF : scoreRea=0.7745966692414834 ^ scoreProtTaxo=53.734496423617 ^ scorePageRankTopoDiv=7.774312429831847E-5 (3)  
class OTHER IF : scoreRea=1.044465935734187 ^ scoreProtTaxo=0.0 ^ scorePageRankTopoDiv=6.556201102852384E-5 (3)  
class OTHER IF : scoreRea=0.654636707079771 ^ scoreProtTaxo=0.0 ^ scorePageRankTopoDiv=7.51875193871095E-5 (3)  
class OTHER IF : scoreRea=0.7071067811865476 ^ scoreProtTaxo=158.79296259232737 ^ scorePageRankTopoDiv=5.673579070415349E-5 (3)  
class OTHER IF : 0.3922322702763681<=scoreRea<=0.408248290463863 ^ 8.609939537894114<=scoreProtTaxo<=23.547981101223865 ^ 3.8884620735136614E-  
5<=scorePageRankTopoDiv<=4.7523107196888775E-5 (9)  
class OTHER IF : 0.9554425212028317<=scoreRea<=1.044465935734187 ^ 0.0<=scoreProtTaxo<=0.0875166975021412 ^ 6.728558346708853E-  
5<=scorePageRankTopoDiv<=6.881127796865302E-5 (12)  
class OTHER IF : 0.3872983346207417<=scoreRea<=0.408248290463863 ^ 40.06437409876283<=scoreProtTaxo<=47.54718111935941 ^ 6.086380563487903E-  
5<=scorePageRankTopoDiv<=7.323460746215443E-5 (7)  
class OTHER IF : scoreRea=0.40206235255037975 ^ scoreProtTaxo=0.18178615015434169 ^ scorePageRankTopoDiv=5.203961345268193E-5 (2)



class OTHER IF : scoreRea=0.5462951617043315 ^ scoreProtTaxo=0.5947363999761335 ^ scorePageRankTopoDiv=4.583609822462573E-5 (4)  
class OTHER IF : 0.32025630761017426<=scoreRea<=0.49507377148833714 ^ 39.60578401929289<=scoreProtTaxo<=96.40149730579888 ^ 4.960844882259927E-5<=scorePageRankTopoDiv<=5.273409131160857E-5 (6)  
class OTHER IF : scoreRea=0.4714045207910317 ^ scoreProtTaxo=18.82846753284995 ^ scorePageRankTopoDiv=5.638905553981655E-5 (2)  
class OTHER IF : scoreRea=0.8770580193070292 ^ scoreProtTaxo=61.90623858885454 ^ scorePageRankTopoDiv=5.637178992061003E-5 (3)  
class OTHER IF : 0.25677629550654774<=scoreRea<=0.5773502691896257 ^ 30.83577491294994<=scoreProtTaxo<=32.56157357141713 ^ 6.448584985880469E-5<=scorePageRankTopoDiv<=6.629876994896196E-5 (16)  
class DEGRADATION IF : scoreRea=0.7071067811865476 ^ scoreProtTaxo=0.08182885492431484 ^ scorePageRankTopoDiv=5.673579070415349E-5 (1)  
class BIOSYNTHESIS IF : scoreRea=1.0 ^ scoreProtTaxo=0.0 ^ scorePageRankTopoDiv=2.0507683798991577E-4 (2)  
class OTHER IF : 0.24397501823713327<=scoreRea<=0.44781107551989907 ^ 29.521443347764954<=scoreProtTaxo<=38.509613026640984 ^ 2.0674138746251432E-5<=scorePageRankTopoDiv<=2.152043334018977E-5 (18)  
class BIOSYNTHESIS IF : scoreRea=0.5547001962252291 ^ scoreProtTaxo=27.102885552202117 ^ scorePageRankTopoDiv=8.236502969785701E-5 (2)  
class DEGRADATION IF : 0.28867513459481287<=scoreRea<=0.2988071523335984 ^ 21.952190576265732<=scoreProtTaxo<=30.177599308096063 ^ 2.4269456232019226E-5<=scorePageRankTopoDiv<=4.027485301057047E-5 (18)  
class BIOSYNTHESIS IF : 0.5504818825631803<=scoreRea<=0.7933470778425575 ^ 10.84536134295424<=scoreProtTaxo<=81.22294317160403 ^ 4.197659114448056E-5<=scorePageRankTopoDiv<=5.060159247463918E-5 (37)  
class DETOX IF : scoreRea=0.7071067811865476 ^ scoreProtTaxo=0.0 ^ scorePageRankTopoDiv=6.49456574064399E-5 (1)  
class DETOX IF : scoreRea=0.4714045207910317 ^ scoreProtTaxo=5.626160592721068 ^ scorePageRankTopoDiv=1.8579819527032382E-4 (3)  
class DETOX IF : scoreRea=0.5773502691896257 ^ scoreProtTaxo=63.12025864186631 ^ scorePageRankTopoDiv=1.7909317517514394E-4 (3)  
class DETOX IF : scoreRea=1.224744871391589 ^ scoreProtTaxo=0.0 ^ scorePageRankTopoDiv=1.7121731471953552E-4 (2)  
class DETOX IF : scoreRea=1.4142135623730951 ^ scoreProtTaxo=0.0 ^ scorePageRankTopoDiv=1.653816457352169E-4 (3)  
class DETOX IF : scoreRea=1.0 ^ scoreProtTaxo=0.0 ^ scorePageRankTopoDiv=1.5033597960863803E-4 (3)  
class DETOX IF : scoreRea=1.5 ^ scoreProtTaxo=0.0 ^ scorePageRankTopoDiv=1.3793280935725012E-4 (3)  
class DETOX IF : scoreRea=0.3333333333333333 ^ scoreProtTaxo=3.978296307157593 ^ scorePageRankTopoDiv=1.313791638078683E-4 (3)  
class DETOX IF : scoreRea=0.21821789023599236 ^ scoreProtTaxo=0.0 ^ scorePageRankTopoDiv=1.1724400452715474E-4 (6)  
class DETOX IF : scoreRea=1.4142135623730951 ^ scoreProtTaxo=0.0 ^ scorePageRankTopoDiv=1.0815609884967573E-4 (5)  
class DETOX IF : 0.28867513459481287<=scoreRea<=0.3086066999241838 ^ scoreProtTaxo=0.0 ^ 1.1754985763092038E-4<=scorePageRankTopoDiv<=2.2198230760370834E-4 (13)  
class DETOX IF : scoreRea=1.1677484162422844 ^ scoreProtTaxo=0.0 ^ scorePageRankTopoDiv=1.0311728461534989E-4 (2)  
class DETOX IF : scoreRea=1.5491933384829668 ^ scoreProtTaxo=0.0 ^ scorePageRankTopoDiv=6.927764921033681E-5 (1)  
class DETOX IF : scoreRea=0.816496580927726 ^ scoreProtTaxo=136.4722494436797 ^ scorePageRankTopoDiv=9.957483086475267E-5 (2)  
class DETOX IF : scoreRea=1.0274023338281626 ^ scoreProtTaxo=35.59127779829795 ^ scorePageRankTopoDiv=9.314989437145699E-5 (2)  
class DETOX IF : scoreRea=1.1649647450214349 ^ scoreProtTaxo=145.869357387843 ^ scorePageRankTopoDiv=5.289018487006144E-5 (2)  
class DETOX IF : scoreRea=0.21821789023599236 ^ scoreProtTaxo=0.0 ^ scorePageRankTopoDiv=6.327543175025379E-5 (6)  
class DETOX IF : scoreRea=0.8660254037844386 ^ scoreProtTaxo=0.0 ^ scorePageRankTopoDiv=8.677801489810921E-5 (4)  
class DETOX IF : scoreRea=1.1547005383792515 ^ scoreProtTaxo=10.736953861194982 ^ scorePageRankTopoDiv=6.592735397720618E-5 (2)  
class DETOX IF : scoreRea=0.9428090415820634 ^ scoreProtTaxo=28.33725463058259 ^ scorePageRankTopoDiv=7.382789095532152E-5 (4)  
class DETOX IF : scoreRea=0.8257228238447705 ^ scoreProtTaxo=0.0 ^ scorePageRankTopoDiv=7.291493120905716E-5 (2)  
class BIOSYNTHESIS IF : 0.6488856845230502<=scoreRea<=0.7071067811865476 ^ scoreProtTaxo=0.0 ^ 6.164120344039986E-5<=scorePageRankTopoDiv<=6.350873347874623E-5 (19)  
class BIOSYNTHESIS IF : scoreRea=1.0 ^ scoreProtTaxo=0.0 ^ scorePageRankTopoDiv=2.515433611321339E-4 (6)  
class OTHER IF : scoreRea=2.1032382440206603 ^ scoreProtTaxo=0.032200144283896934 ^ scorePageRankTopoDiv=2.089653430203537E-4 (6)  
class BIOSYNTHESIS IF : 3.618347271170902<=scoreRea<=6.323973992579629 ^ 4.17119000018096<=scoreProtTaxo<=29.932079089972547 ^ 2.7861408614411143E-4<=scorePageRankTopoDiv<=4.491850260334036E-4 (11)  
class BIOSYNTHESIS IF : scoreRea=3.7859388972001824 ^ scoreProtTaxo=1.5438918689156014 ^ scorePageRankTopoDiv=5.0759790640253544E-5 (7)  
class BIOSYNTHESIS IF : 0.6454972243679028<=scoreRea<=1.860521018838127 ^ 1.786383293240843<=scoreProtTaxo<=2.1278986237028517 ^ 1.1603744675636554E-4<=scorePageRankTopoDiv<=1.221292855312842E-4 (26)  
class DEGRADATION IF : 0.4472135954999579<=scoreRea<=1.0 ^ 86.77558163807879<=scoreProtTaxo<=152.79187765288137 ^ 1.3520119512554292E-4<=scorePageRankTopoDiv<=1.399925842034762E-4 (20)  
class BIOSYNTHESIS IF : scoreRea=0.7071067811865476 ^ scoreProtTaxo=168.14999256616102 ^ scorePageRankTopoDiv=1.3114233478901078E-4 (7)  
class DEGRADATION IF : scoreRea=0.5773502691896257 ^ 35.276659918992415<=scoreProtTaxo<=40.259317459798886 ^ 1.1001563219750556E-4<=scorePageRankTopoDiv<=1.1076060971949355E-4 (12)  
class DEGRADATION IF : scoreRea=0.7071067811865476 ^ scoreProtTaxo=0.0 ^ scorePageRankTopoDiv=1.3535170583744646E-4 (1)  
class DEGRADATION IF : scoreRea=1.0 ^ scoreProtTaxo=0.0 ^ scorePageRankTopoDiv=1.3276998503471255E-4 (4)  
class DEGRADATION IF : scoreRea=1.0 ^ scoreProtTaxo=0.0 ^ scorePageRankTopoDiv=1.378098766816995E-4 (4)  
class DEGRADATION IF : scoreRea=0.7071067811865476 ^ scoreProtTaxo=0.0 ^ 1.4943057764010143E-4<=scorePageRankTopoDiv<=1.5357082380142837E-4 (9)  
class DEGRADATION IF : scoreRea=0.7071067811865476 ^ scoreProtTaxo=3.675466178295334 ^ scorePageRankTopoDiv=1.216405836434982E-4 (5)  
class DEGRADATION IF : scoreRea=0.6454972243679028 ^ scoreProtTaxo=0.08101161375304392 ^ scorePageRankTopoDiv=1.474440601213266E-4 (4)  
class DEGRADATION IF : scoreRea=0.9274777915203366 ^ scoreProtTaxo=0.9481027057697574 ^ scorePageRankTopoDiv=1.3124640696624947E-4 (2)  
class DEGRADATION IF : scoreRea=0.6236095644623235 ^ scoreProtTaxo=4.634759947408514 ^ scorePageRankTopoDiv=1.4429449547506584E-4 (2)  
class DEGRADATION IF : scoreRea=0.816496580927726 ^ scoreProtTaxo=37.27112086645609 ^ scorePageRankTopoDiv=1.422812003992657E-4 (1)  
class DEGRADATION IF : scoreRea=0.7071067811865476 ^ scoreProtTaxo=0.0 ^ scorePageRankTopoDiv=1.437745131890555E-4 (3)  
class DEGRADATION IF : scoreRea=0.7071067811865476 ^ scoreProtTaxo=0.0 ^ scorePageRankTopoDiv=1.270951021637754E-4 (5)  
class DEGRADATION IF : 0.6859943405700354<=scoreRea<=0.816496580927726 ^ 37.27112086645608<=scoreProtTaxo<=192.08347951924614 ^ 1.275528766157473E-4<=scorePageRankTopoDiv<=1.3077444691159042E-4 (11)  
class DEGRADATION IF : scoreRea=0.816496580927726 ^ scoreProtTaxo=0.0 ^ 1.2621347934763986E-4<=scorePageRankTopoDiv<=1.5558559912676252E-4 (7)  
class DEGRADATION IF : 0.5773502691896257<=scoreRea<=0.6030226891555273 ^ scoreProtTaxo=0.0 ^ 1.253709265304216E-4<=scorePageRankTopoDiv<=1.4445450974778128E-4 (7)  
class BIOSYNTHESIS IF : scoreRea=0.6605782590758164 ^ scoreProtTaxo=10.60549955225613 ^ scorePageRankTopoDiv=1.163644044771755E-4 (3)

class BIOSYNTHESIS IF : 1.0<=scoreRea<=1.5491933384829668 ^ scoreProtTaxo=0.0 ^ 2.5468431845195196E-4<=scorePageRankTopoDiv<=2.5693283752330506E-4 (9)  
class BIOSYNTHESIS IF : 0.8498365855987975<=scoreRea<=0.8944271909999159 ^ 0.18874604428679911<=scoreProtTaxo<=0.9389651216804074 ^ 1.6829596743622756E-4<=scorePageRankTopoDiv<=1.6920558443768528E-4 (3)  
class BIOSYNTHESIS IF : 1.0377490433255416<=scoreRea<=1.1547005383792515 ^ 0.0<=scoreProtTaxo<=0.006194274740573478 ^ 1.0214790864270169E-4<=scorePageRankTopoDiv<=1.1856194866072717E-4 (22)  
class DEGRADATION IF : scoreRea=0.8660254037844386 ^ scoreProtTaxo=149.76606980270952 ^ scorePageRankTopoDiv=2.018023903939492E-4 (4)  
class DEGRADATION IF : 0.15836151649297917<=scoreRea<=0.49507377148833714 ^ 0.0<=scoreProtTaxo<=0.0314917783188618 ^ 3.247282870321995E-5<=scorePageRankTopoDiv<=3.507847056660574E-5 (33)  
class BIOSYNTHESIS IF : 1.118033988749895<=scoreRea<=2.2771001702132443 ^ 222.4609932657902<=scoreProtTaxo<=539.0003923984657 ^ 7.809608686909931E-5<=scorePageRankTopoDiv<=1.257860095616677E-4 (26)  
class BIOSYNTHESIS IF : 2.727851988394575<=scoreRea<=6.2341841409373036 ^ 41.81775198112704<=scoreProtTaxo<=426.4726970783042 ^ 2.572389005929887E-4<=scorePageRankTopoDiv<=4.229094722569427E-4 (30)  
class DEGRADATION IF : 0.75<=scoreRea<=1.0 ^ 20.96265560719317<=scoreProtTaxo<=42.330049501311514 ^ 6.446530518817172E-5<=scorePageRankTopoDiv<=6.94933160911338E-5 (12)  
class DEGRADATION IF : 0.6009252125773316<=scoreRea<=0.9393364366277243 ^ 0.07514655700527341<=scoreProtTaxo<=0.6377796746836621 ^ 6.672413144499774E-5<=scorePageRankTopoDiv<=6.833813604255634E-5 (18)  
class DEGRADATION IF : 0.8744746321952062<=scoreRea<=0.9258200997725514 ^ scoreProtTaxo=0.0 ^ 5.557122140811065E-5<=scorePageRankTopoDiv<=6.655225016107375E-5 (8)  
class BIOSYNTHESIS IF : 0.18490006540840973<=scoreRea<=0.28867513459481287 ^ 4.060796026089901<=scoreProtTaxo<=37.18965662133416 ^ 1.8669203833170315E-4<=scorePageRankTopoDiv<=2.482079768896534E-4 (14)  
class BIOSYNTHESIS IF : 0.12403473458920845<=scoreRea<=0.2581988897471611 ^ 0.0<=scoreProtTaxo<=0.08306969993895892 ^ 1.258378581959181E-4<=scorePageRankTopoDiv<=1.586938187803185E-4 (22)  
class OTHER IF : scoreRea=1.4142135623730951 ^ scoreProtTaxo=50.01269874088847 ^ scorePageRankTopoDiv=1.715924490479643E-4 (3)  
class DEGRADATION IF : 0.816496580927726<=scoreRea<=1.0 ^ scoreProtTaxo=0.0 ^ 3.504179915896579E-4<=scorePageRankTopoDiv<=3.5357794900295656E-4 (4)  
class BIOSYNTHESIS IF : scoreRea=1.0 ^ scoreProtTaxo=0.0 ^ 1.750635775572479E-4<=scorePageRankTopoDiv<=1.7605299533700306E-4 (4)  
class BIOSYNTHESIS IF : scoreRea=1.4142135623730951 ^ 7.411702458499891<=scoreProtTaxo<=23.626209496421488 ^ 1.6607858601140786E-4<=scorePageRankTopoDiv<=1.7412280277644346E-4 (7)  
class BIOSYNTHESIS IF : scoreRea=0.408248290463863 ^ scoreProtTaxo=0.0 ^ 7.845604803753864E-5<=scorePageRankTopoDiv<=7.922169601627488E-5 (8)  
class BIOSYNTHESIS IF : 0.31622776601683794<=scoreRea<=0.7071067811865476 ^ 108.98440840078962<=scoreProtTaxo<=139.00552347161903 ^ 6.0036908760882205E-5<=scorePageRankTopoDiv<=7.51563674818164E-5 (16)  
class BIOSYNTHESIS IF : scoreRea=1.0 ^ 70.03289743182262<=scoreProtTaxo<=158.40387360617618 ^ 3.480039079140226E-4<=scorePageRankTopoDiv<=3.815772077000262E-4 (15)  
class BIOSYNTHESIS IF : scoreRea=1.4142135623730951 ^ 872.5390659413733<=scoreProtTaxo<=1247.2783381883148 ^ 2.2070202400956655E-4<=scorePageRankTopoDiv<=2.61748881563180006E-4 (6)  
class ENERGY IF : 1.288181280536124<=scoreRea<=1.3184955758367207 ^ 12.81443337256947<=scoreProtTaxo<=19.90789234210125 ^ 2.2606890757750802E-4<=scorePageRankTopoDiv<=2.518505177794346E-4 (5)  
class DEGRADATION IF : 0.125<=scoreRea<=0.18257418583505536 ^ 0.0<=scoreProtTaxo<=43.07890918143643 ^ 4.442793668447999E-5<=scorePageRankTopoDiv<=4.5095808332954006E-5 (14)  
class BIOSYNTHESIS IF : scoreRea=1.0 ^ 53.43201654584469<=scoreProtTaxo<=53.61838684574613 ^ 1.8222582181223228E-4<=scorePageRankTopoDiv<=1.8377567901230646E-4 (2)  
class OTHER IF : scoreRea=1.4142135623730951 ^ scoreProtTaxo=0.0 ^ scorePageRankTopoDiv=1.4179066386677404E-4 (1)  
class OTHER IF : 0.8498365855987975<=scoreRea<=0.9258200997725514 ^ 0.0<=scoreProtTaxo<=0.02635667702794845 ^ 1.0144989631180699E-4<=scorePageRankTopoDiv<=1.1424636450965728E-4 (13)  
class OTHER IF : 0.816496580927726<=scoreRea<=1.0 ^ 50.01269874088847<=scoreProtTaxo<=78.24924280788699 ^ 1.715924490479643E-4<=scorePageRankTopoDiv<=1.7327229527089061E-4 (4)  
class OTHER IF : scoreRea=0.7171371656006362 ^ scoreProtTaxo=39.11883789500987 ^ scorePageRankTopoDiv=1.4131650372210225E-4 (2)  
class OTHER IF : 0.7071067811865476<=scoreRea<=0.816496580927726 ^ scoreProtTaxo=0.0 ^ 1.2496190361871147E-4<=scorePageRankTopoDiv<=1.2604521257776215E-4 (5)  
class OTHER IF : scoreRea=1.3764944032233706 ^ scoreProtTaxo=4.672811180653771 ^ scorePageRankTopoDiv=1.7450034043602316E-4 (2)  
class OTHER IF : 1.3093073414159542<=scoreRea<=1.5275252316519465 ^ 33.27864608928911<=scoreProtTaxo<=54.765275877937235 ^ 1.1076165501706806E-4<=scorePageRankTopoDiv<=1.1133601723393347E-4 (10)  
class OTHER IF : scoreRea=1.1881770515720091 ^ scoreProtTaxo=35.97190533881746 ^ scorePageRankTopoDiv=1.1442075717380128E-4 (1)  
class OTHER IF : scoreRea=0.8660254037844386 ^ scoreProtTaxo=0.0 ^ scorePageRankTopoDiv=1.3438022261259893E-4 (1)  
class OTHER IF : scoreRea=1.0 ^ scoreProtTaxo=0.0 ^ scorePageRankTopoDiv=1.5263370408995772E-4 (2)  
class OTHER IF : 1.8708286933869707<=scoreRea<=2.0207259421636903 ^ 1.587883023989004<=scoreProtTaxo<=22.943877550201837 ^ 1.116493007709621E-4<=scorePageRankTopoDiv<=1.376020875302525E-4 (6)  
class OTHER IF : scoreRea=1.5430334996209192 ^ scoreProtTaxo=0.0 ^ scorePageRankTopoDiv=1.1966632255606324E-4 (1)  
class OTHER IF : 0.7745966692414834<=scoreRea<=1.0 ^ 1.7452983457025155<=scoreProtTaxo<=2.1645385819414065 ^ 1.506377396134267E-4<=scorePageRankTopoDiv<=1.82903042849188E-4 (11)  
class OTHER IF : 1.3719886811400708<=scoreRea<=1.4752866122334647 ^ 8.009880206310035<=scoreProtTaxo<=29.305596285694808 ^ 1.0730303042438511E-4<=scorePageRankTopoDiv<=1.1945951991812146E-4 (7)  
class OTHER IF : scoreRea=1.1359236684941296 ^ 0.036214922507728946<=scoreProtTaxo<=0.911596007038787 ^ 1.09640490508312E-4<=scorePageRankTopoDiv<=1.36630095633726E-4 (8)  
class OTHER IF : scoreRea=1.3334899657372021 ^ scoreProtTaxo=0.786336046600834 ^ scorePageRankTopoDiv=1.5245768517501833E-4 (2)  
class OTHER IF : 1.4142135623730951<=scoreRea<=1.5078740698501039 ^ 0.0<=scoreProtTaxo<=0.6787384779869023 ^ 1.2954758572089752E-4<=scorePageRankTopoDiv<=1.3162423737102732E-4 (7)  
class OTHER IF : scoreRea=1.4142135623730951 ^ scoreProtTaxo=0.0 ^ scorePageRankTopoDiv=1.518647951744723E-4 (2)  
class OTHER IF : 0.8660254037844386<=scoreRea<=1.3093073414159542 ^ 8.424649067330424<=scoreProtTaxo<=10.204146751821096 ^ 1.3370027787848343E-4<=scorePageRankTopoDiv<=1.885248244530818E-4 (5)

class DEGRADATION IF : scoreRea=1.4142135623730951 ^ scoreProtTaxo=0.0 ^ scorePageRankTopoDiv=1.48335511616314E-4 (5)  
class DEGRADATION IF : scoreRea=1.4142135623730951 ^ scoreProtTaxo=0.0 ^ scorePageRankTopoDiv=1.3842061663477223E-4 (3)  
class DETOX IF : scoreRea=0.25 ^ scoreProtTaxo=1.7854366557743602 ^ scorePageRankTopoDiv=1.9902855514769744E-4 (3)  
class DEGRADATION IF : scoreRea=1.8516401995451028 ^ scoreProtTaxo=0.0 ^ scorePageRankTopoDiv=5.9109305162889634E-5 (3)  
class DEGRADATION IF : 1.0<=scoreRea<=1.247219128924647 ^ 26.286231011957284<=scoreProtTaxo<=38.476103319852186 ^ 2.5414532404779787E-4<=scorePageRankTopoDiv<=2.7478026043357365E-4 (11)  
class DEGRADATION IF : 1.0<=scoreRea<=1.3228756555322954 ^ 0.0<=scoreProtTaxo<=44.43519300996254 ^ 4.6324579126172384E-5<=scorePageRankTopoDiv<=4.7327178179514555E-5 (15)  
class BIOSYNTHESIS IF : 0.7905694150420949<=scoreRea<=0.816496580927726 ^ 42.46502705676863<=scoreProtTaxo<=71.02648797843077 ^ 5.8031652298977115E-5<=scorePageRankTopoDiv<=6.022372792345972E-5 (6)  
class BIOSYNTHESIS IF : scoreRea=1.4142135623730951 ^ 30.982865119868915<=scoreProtTaxo<=69.47147410476717 ^ 1.9700594225831525E-4<=scorePageRankTopoDiv<=2.4114374672442945E-4 (24)  
class BIOSYNTHESIS IF : 1.0<=scoreRea<=1.035098339013531 ^ 28.753814293592814<=scoreProtTaxo<=32.55759793194711 ^ 3.4092995079697936E-4<=scorePageRankTopoDiv<=3.739122664785864E-4 (7)  
class BIOSYNTHESIS IF : scoreRea=1.4142135623730951 ^ scoreProtTaxo=1.46897744599614 ^ scorePageRankTopoDiv=7.20783349400754E-5 (6)  
class BIOSYNTHESIS IF : 0.8451542547285166<=scoreRea<=1.0 ^ scoreProtTaxo=0.0 ^ 2.157200922979042E-4<=scorePageRankTopoDiv<=2.218837803860846E-4 (19)  
class BIOSYNTHESIS IF : scoreRea=0.6340037731068526 ^ scoreProtTaxo=0.0 ^ scorePageRankTopoDiv=7.369165963961018E-5 (4)  
class BIOSYNTHESIS IF : 0.23570226039551584<=scoreRea<=0.25 ^ 16.82062389998916<=scoreProtTaxo<=118.97441201481755 ^ 1.2244885107621335E-4<=scorePageRankTopoDiv<=1.7973368048266475E-4 (14)  
class BIOSYNTHESIS IF : 0.14213381090374028<=scoreRea<=0.2041241452319315 ^ 0.0<=scoreProtTaxo<=0.5325943121119973 ^ 4.67243619701902E-5<=scorePageRankTopoDiv<=4.7480361500771855E-5 (12)  
class BIOSYNTHESIS IF : scoreRea=0.7071067811865476 ^ scoreProtTaxo=0.0 ^ 2.2017809896165218E-4<=scorePageRankTopoDiv<=2.2430370788519718E-4 (10)  
class BIOSYNTHESIS IF : 1.0<=scoreRea<=1.2792042981336627 ^ 75.06075604111761<=scoreProtTaxo<=126.37589020471343 ^ 3.69476477757441E-5<=scorePageRankTopoDiv<=6.820390724750919E-5 (26)  
class BIOSYNTHESIS IF : 0.4803844614152614<=scoreRea<=0.7385489458759964 ^ 11.049887980839541<=scoreProtTaxo<=36.19851154731422 ^ 1.9549578836361636E-5<=scorePageRankTopoDiv<=2.395797125964908E-5 (14)  
class ENERGY IF : scoreRea=1.0 ^ scoreProtTaxo=0.0 ^ scorePageRankTopoDiv=1.4166556864442256E-4 (5)  
class BIOSYNTHESIS IF : scoreRea=2.057983021710106 ^ scoreProtTaxo=16.820212169959394 ^ scorePageRankTopoDiv=1.2409622007166675E-4 (3)  
class BIOSYNTHESIS IF : scoreRea=1.1094003924504583 ^ scoreProtTaxo=0.0 ^ scorePageRankTopoDiv=3.773137898809049E-5 (2)  
class ENERGY IF : scoreRea=0.988495919569998 ^ scoreProtTaxo=0.07850958084016749 ^ scorePageRankTopoDiv=8.177462725052139E-5 (2)  
class BIOSYNTHESIS IF : 2.623303343135812<=scoreRea<=2.6568446566202857 ^ 6.485298193530774<=scoreProtTaxo<=33.036183566237966 ^ 3.176417486336401E-4<=scorePageRankTopoDiv<=4.5982431233079004E-4 (9)  
class BIOSYNTHESIS IF : 2.3326329481056884<=scoreRea<=2.743189677316311 ^ 0.0<=scoreProtTaxo<=11.502680546417647 ^ 1.2048544308923464E-4<=scorePageRankTopoDiv<=1.9781045464983038E-4 (36)  
class DEGRADATION IF : scoreRea=1.0 ^ scoreProtTaxo=0.0 ^ scorePageRankTopoDiv=5.673579070415349E-5 (5)  
class BIOSYNTHESIS IF : 0.408248290463863<=scoreRea<=0.7071067811865476 ^ 0.0<=scoreProtTaxo<=0.02110942242487886 ^ 4.2470681528740396E-5<=scorePageRankTopoDiv<=4.3178120633386797E-5 (12)  
class OTHER IF : scoreRea=0.3872983346207417 ^ scoreProtTaxo=0.0 ^ scorePageRankTopoDiv=1.0030074501858312E-4 (7)  
class BIOSYNTHESIS IF : 0.5707817929853929<=scoreRea<=0.6454972243679028 ^ 3.93137454201378<=scoreProtTaxo<=10.240405284120385 ^ 7.14878342041647E-5<=scorePageRankTopoDiv<=7.631946035900328E-5 (13)  
class BIOSYNTHESIS IF : 0.31622776601683794<=scoreRea<=0.5 ^ 0.0<=scoreProtTaxo<=0.11747829627593917 ^ 1.8641638185916442E-4<=scorePageRankTopoDiv<=2.465952387977148E-4 (19)  
class DEGRADATION IF : 0.408248290463863<=scoreRea<=0.4472135954999579 ^ 0.0<=scoreProtTaxo<=25.4524903361019 ^ 1.1233582394563083E-4<=scorePageRankTopoDiv<=1.2710021931276782E-4 (7)  
class BIOSYNTHESIS IF : 1.5191090506255<=scoreRea<=4.780914437337574 ^ 34.09388015135132<=scoreProtTaxo<=83.23689560348458 ^ 1.6410648387959895E-4<=scorePageRankTopoDiv<=1.992035753298273E-4 (24)  
class DEGRADATION IF : scoreRea=1.0 ^ scoreProtTaxo=0.0 ^ 2.6929902625606435E-4<=scorePageRankTopoDiv<=2.695305089690564E-4 (8)  
class BIOSYNTHESIS IF : 0.21081851067789195<=scoreRea<=0.26967994498529685 ^ scoreProtTaxo=0.0 ^ 1.6946786127234814E-4<=scorePageRankTopoDiv<=1.746618148365526E-4 (5)  
class ENERGY IF : 0.4387634544762784<=scoreRea<=0.7006490497453708 ^ 2.3996744093115354<=scoreProtTaxo<=4.109994975148521 ^ 1.3155681634273485E-4<=scorePageRankTopoDiv<=1.8211138918884125E-4 (3)  
class ENERGY IF : 0.19069251784911848<=scoreRea<=0.3464101615137755 ^ scoreProtTaxo=0.0 ^ 8.86812523631926E-5<=scorePageRankTopoDiv<=9.967564087338181E-5 (9)  
class ENERGY IF : 0.2738612787525831<=scoreRea<=0.31622776601683794 ^ 6.471473698427908<=scoreProtTaxo<=7.995814409831503 ^ 9.568779635488795E-5<=scorePageRankTopoDiv<=1.0824895564286868E-4 (11)  
class ENERGY IF : 0.5<=scoreRea<=0.5869391856534222 ^ 59.0592922409336<=scoreProtTaxo<=78.80633749366822 ^ 1.510386644478927E-4<=scorePageRankTopoDiv<=1.602622308140349E-4 (3)  
class ENERGY IF : scoreRea=0.17541160386140583 ^ scoreProtTaxo=54.74892009226977 ^ scorePageRankTopoDiv=1.2315241317049314E-4 (1)  
class ENERGY IF : 0.7071067811865476<=scoreRea<=0.7200822998230955 ^ 40.0<=scoreProtTaxo<=49.278964507472764 ^ 1.4008561574545367E-4<=scorePageRankTopoDiv<=1.441165393286038E-4 (3)  
class ENERGY IF : scoreRea=0.2672612419124244 ^ scoreProtTaxo=0.0 ^ scorePageRankTopoDiv=1.3980167757492946E-4 (2)  
class ENERGY IF : 0.36313651960128146<=scoreRea<=0.37947331922020555 ^ 1.8732433424225876<=scoreProtTaxo<=9.792832691040099 ^ 8.262057952316842E-5<=scorePageRankTopoDiv<=1.4041321871684098E-4 (11)  
class DEGRADATION IF : scoreRea=2.1908902300206647 ^ scoreProtTaxo=744.0707051693515 ^ scorePageRankTopoDiv=2.956950506156661E-4 (3)  
class DEGRADATION IF : 0.23570226039551584<=scoreRea<=0.3713906763541037 ^ scoreProtTaxo=0.0 ^ 9.986780345653794E-5<=scorePageRankTopoDiv<=1.053375883940584E-4 (3)  
class DEGRADATION IF : scoreRea=0.3535533905932738 ^ scoreProtTaxo=6.037872455605616 ^ scorePageRankTopoDiv=1.0011139754082549E-4 (1)  
class DEGRADATION IF : 1.3826657968874303<=scoreRea<=2.0 ^ 33.08715911819257<=scoreProtTaxo<=147.41252166934837 ^ 5.8394113680207267E-5<=scorePageRankTopoDiv<=6.228331214240753E-5 (12)

class BIOSYNTHESIS IF : 0.9992257064266816<=scoreRea<=1.0709591052033318 ^ 0.007362727567874315<=scoreProtTaxo<=0.05059346213529292 ^ 9.374543842992507E-5<=scorePageRankTopoDiv<=1.2410510066503347E-4 (8)

class OTHER IF : 0.6030226891555273<=scoreRea<=0.7745966692414834 ^ 4.14886668904373<=scoreProtTaxo<=5.02223911598203 ^ 1.0751660382843966E-4<=scorePageRankTopoDiv<=1.0974209762183784E-4 (6)

class BIOSYNTHESIS IF : 0.3779644730092272<=scoreRea<=0.48507125007266594 ^ 2.5047877479323812<=scoreProtTaxo<=5.073680764092357 ^ 1.8312929137206794E-4<=scorePageRankTopoDiv<=2.433875122349829E-4 (17)

class BIOSYNTHESIS IF : scoreRea=1.525660753153479 ^ scoreProtTaxo=1.3487912944653087 ^ scorePageRankTopoDiv=1.111324093273548E-4 (4)

class BIOSYNTHESIS IF : 0.5107539184552492<=scoreRea<=0.7071067811865476 ^ 6.516959502501294<=scoreProtTaxo<=14.399886431850499 ^ 1.2814039822525947E-4<=scorePageRankTopoDiv<=1.5623558428847628E-4 (14)

class BIOSYNTHESIS IF : 0.6009252125773316<=scoreRea<=0.6324555320336759 ^ 0.0<=scoreProtTaxo<=0.012258083904586227 ^ 1.0735501366193442E-4<=scorePageRankTopoDiv<=1.081273666574102E-4 (11)

class BIOSYNTHESIS IF : 0.14824986333222023<=scoreRea<=0.4803844614152614 ^ 0.0<=scoreProtTaxo<=25.596212983965433 ^ 1.1909069617416628E-5<=scorePageRankTopoDiv<=1.713687157423472E-5 (27)

class DEGRADATION IF : 0.21437323142813605<=scoreRea<=0.25 ^ 1.9837456301647234<=scoreProtTaxo<=13.726780403849244 ^ 3.441799469223626E-5<=scorePageRankTopoDiv<=4.6315447962956124E-5 (15)

class BIOSYNTHESIS IF : scoreRea=0.23570226039551584 ^ scoreProtTaxo=0.0 ^ 6.426013578233957E-5<=scorePageRankTopoDiv<=6.739248125225802E-5 (15)

class BIOSYNTHESIS IF : 0.5686020318963798<=scoreRea<=0.5773502691896257 ^ 0.0<=scoreProtTaxo<=0.20442280262248982 ^ 5.80121844508716E-5<=scorePageRankTopoDiv<=6.55979874717408E-5 (22)

class BIOSYNTHESIS IF : 0.5393598899705937<=scoreRea<=0.7935838209659245 ^ 0.0<=scoreProtTaxo<=0.1563812696229734 ^ 2.9144627530234042E-5<=scorePageRankTopoDiv<=3.1995246100241945E-5 (2)

class BIOSYNTHESIS IF : 0.600000000000001<=scoreRea<=0.6324555320336759 ^ 89.25049222649379<=scoreProtTaxo<=135.17946844016356 ^ 2.8122177261014897E-5<=scorePageRankTopoDiv<=3.481353559664781E-5 (6)

class BIOSYNTHESIS IF : scoreRea=1.0 ^ scoreProtTaxo=0.0 ^ 1.019778459386172E-4<=scorePageRankTopoDiv<=1.061427001844723E-4 (10)

class OTHER IF : scoreRea=1.224744871391589 ^ scoreProtTaxo=69.47865726904281 ^ scorePageRankTopoDiv=1.9161987328237336E-4 (3)

class BIOSYNTHESIS IF : 0.3786412228313765<=scoreRea<=0.4472135954999579 ^ 0.0<=scoreProtTaxo<=32.23146137542037 ^ 6.642179634668017E-5<=scorePageRankTopoDiv<=6.979292587183943E-5 (26)

class ENERGY IF : scoreRea=0.8498365855987975 ^ scoreProtTaxo=0.037976995945837595 ^ scorePageRankTopoDiv=1.750613415112989E-4 (7)

class BIOSYNTHESIS IF : 1.1952286093343936<=scoreRea<=1.4638501094227998 ^ 28.77526436321188<=scoreProtTaxo<=40.66403414395631 ^ scorePageRankTopoDiv=7.669823584620337E-4 (6)

class BIOSYNTHESIS IF : 1.5275252316519465<=scoreRea<=2.5495097567963922 ^ 19.949670566707734<=scoreProtTaxo<=342.0920172399326 ^ 2.4781928015212094E-4<=scorePageRankTopoDiv<=2.9525891501065975E-4 (26)

class BIOSYNTHESIS IF : scoreRea=0.3370999312316211 ^ scoreProtTaxo=125.49902487565595 ^ scorePageRankTopoDiv=8.511191847200069E-5 (3)

class BIOSYNTHESIS IF : 0.4425306015783918<=scoreRea<=1.643989873053573 ^ 0.22814918814676075<=scoreProtTaxo<=0.532040781604257 ^ 4.973927196739342E-5<=scorePageRankTopoDiv<=5.106292680762229E-5 (22)

class BIOSYNTHESIS IF : scoreRea=1.0 ^ 0.0<=scoreProtTaxo<=5.949875623489494 ^ 4.588402872559206E-4<=scorePageRankTopoDiv<=5.701127800920489E-4 (29)

class DEGRADATION IF : 3.1826736817817<=scoreRea<=6.207868749305365 ^ 0.5951374046456729<=scoreProtTaxo<=3.9579657727849646 ^ 2.723813599834274E-4<=scorePageRankTopoDiv<=3.655805459617726E-4 (7)

class DEGRADATION IF : 0.48989794855663565<=scoreRea<=0.546672273590534 ^ 87.1278616789283<=scoreProtTaxo<=100.47307971677706 ^ 4.145231565697189E-5<=scorePageRankTopoDiv<=4.728125419946526E-5 (10)

class DEGRADATION IF : 0.3535533905932738<=scoreRea<=0.816496580927726 ^ scoreProtTaxo=0.0 ^ 3.6222678185925705E-5<=scorePageRankTopoDiv<=3.826109067452951E-5 (20)

class OTHER IF : scoreRea=2.086370335408023 ^ scoreProtTaxo=2.613965019897625 ^ scorePageRankTopoDiv=1.0319430370482758E-4 (2)

class BIOSYNTHESIS IF : 0.11065666703449763<=scoreRea<=0.13093073414159542 ^ 33.85577672978209<=scoreProtTaxo<=74.37073696766814 ^ 2.645619643482403E-5<=scorePageRankTopoDiv<=3.1295818290857415E-5 (11)

class DEGRADATION IF : 0.2672612419124244<=scoreRea<=0.31622776601683794 ^ 6.695548428892289<=scoreProtTaxo<=7.793743442645217 ^ 1.3196199246283668E-4<=scorePageRankTopoDiv<=1.4224012941568427E-4 (10)

class BIOSYNTHESIS IF : scoreRea=2.0 ^ scoreProtTaxo=0.0 ^ 9.350711532682093E-5<=scorePageRankTopoDiv<=1.1747951603456698E-4 (16)

class BIOSYNTHESIS IF : scoreRea=0.7905694150420949 ^ scoreProtTaxo=84.81420871526848 ^ scorePageRankTopoDiv=9.260615655659085E-5 (9)

class DEGRADATION IF : 0.9258200997725514<=scoreRea<=1.2649110640673518 ^ scoreProtTaxo=0.0 ^ 2.450964554055782E-4<=scorePageRankTopoDiv<=2.473229582541308E-4 (11)

class DEGRADATION IF : 1.0<=scoreRea<=1.7566201313073597 ^ 29.36328778093912<=scoreProtTaxo<=52.214331017798195 ^ 1.1457931062108002E-4<=scorePageRankTopoDiv<=1.1885155162372301E-4 (5)

class ENERGY IF : 2.0<=scoreRea<=2.280350850198276 ^ scoreProtTaxo=0.0 ^ 3.642818610374926E-4<=scorePageRankTopoDiv<=3.957519348612055E-4 (11)

class DEGRADATION IF : 0.816496580927726<=scoreRea<=1.0 ^ 117.68533432023266<=scoreProtTaxo<=268.8896708114055 ^ 7.025164265842389E-5<=scorePageRankTopoDiv<=7.397333394659904E-5 (7)

class BIOSYNTHESIS IF : scoreRea=0.655825835783953<=scoreRea<=0.9274777915203366 ^ 0.8159397521989812<=scoreProtTaxo<=1.629651606740295 ^ 1.0610145577243671E-4<=scorePageRankTopoDiv<=1.1495607808269751E-4 (10)

class ENERGY IF : 0.08559209850218258<=scoreRea<=0.10041928905068677 ^ 0.40713606842348365<=scoreProtTaxo<=18.732065380818764 ^ 2.617285533452988E-5<=scorePageRankTopoDiv<=3.3995659231272465E-5 (8)

class DETOX IF : scoreRea=1.0 ^ scoreProtTaxo=76.23179487402706 ^ scorePageRankTopoDiv=2.61377610435628E-4 (3)

class BIOSYNTHESIS IF : scoreRea=0.75955452531275 ^ 103.81745827343019<=scoreProtTaxo<=103.8174582734302 ^ 2.069313681827798E-4<=scorePageRankTopoDiv<=2.069313681827798E-4 (7)

class DEGRADATION IF : 0.19611613513818404<=scoreRea<=0.2721655269759087 ^ 32.32421212596552<=scoreProtTaxo<=53.712253801759694 ^ 8.048526050907137E-5<=scorePageRankTopoDiv<=8.527890121925288E-5 (7)

class BIOSYNTHESIS IF : 1.0<=scoreRea<=4.330127018922194 ^ 0.0<=scoreProtTaxo<=0.3025798391224467 ^ 7.607171232442491E-4<=scorePageRankTopoDiv<=0.0011982853264696502 (17)

class BIOSYNTHESIS IF : scoreRea=0.5773502691896257 ^ scoreProtTaxo=0.0 ^ 8.103062978938698E-5<=scorePageRankTopoDiv<=8.184055624663284E-5 (10)

(16) class BIOSYNTHESIS IF : 0.4472135954999579<=scoreRea<=0.4714045207910317 ^ scoreProtTaxo=0.0 ^ 4.543426893811937E-5<=scorePageRankTopoDiv<=4.5710147296428555E-5

(16) class DEGRADATION IF : 0.49507377148833714<=scoreRea<=1.224744871391589 ^ scoreProtTaxo=0.0 ^ 4.937666043503516E-5<=scorePageRankTopoDiv<=5.12001351746207E-5

(16) class BIOSYNTHESIS IF : 0.2672612419124244<=scoreRea<=0.3670310333590629 ^ 0.0<=scoreProtTaxo<=0.11087798752759649 ^ 2.9726589915500942E-5<=scorePageRankTopoDiv<=3.0254070680625004E-5 (11)

class BIOSYNTHESIS IF : scoreRea=0.15781069215799975 ^ scoreProtTaxo=60.81790855857412 ^ scorePageRankTopoDiv=4.061440716194523E-5 (3)

class BIOSYNTHESIS IF : scoreRea=1.0 ^ scoreProtTaxo=370.8806689330153 ^ scorePageRankTopoDiv=2.5005781477850783E-4 (4)

class ENERGY IF : 1.0<=scoreRea<=1.247219128924647 ^ 0.0<=scoreProtTaxo<=64.47592897360235 ^ 3.945430212065747E-4<=scorePageRankTopoDiv<=3.961479461719977E-4 (3)

class BIOSYNTHESIS IF : scoreRea=1.7320508075688772 ^ scoreProtTaxo=0.0 ^ scorePageRankTopoDiv=4.02643735176089E-4 (2)

class BIOSYNTHESIS IF : 2.0<=scoreRea<=2.898275349237888 ^ 571.296896181361<=scoreProtTaxo<=668.0528309119322 ^ 2.3706178167107297E-4<=scorePageRankTopoDiv<=2.3877773348760504E-4 (6)

class DEGRADATION IF : scoreRea=1.0 ^ scoreProtTaxo=0.0 ^ scorePageRankTopoDiv=1.4244265517510647E-4 (3)

class BIOSYNTHESIS IF : 0.8660254037844386<=scoreRea<=1.0 ^ 0.0<=scoreProtTaxo<=38.00445116638788 ^ 4.3575656373539553E-4<=scorePageRankTopoDiv<=4.5685229637384094E-4 (14)

class OTHER IF : scoreRea=0.7745966692414834 ^ scoreProtTaxo=113.05081279896491 ^ scorePageRankTopoDiv=1.173629918315806E-4 (3)

class OTHER IF : scoreRea=1.0 ^ scoreProtTaxo=0.0 ^ scorePageRankTopoDiv=2.3139856423900248E-4 (4)

class DEGRADATION IF : scoreRea=0.5773502691896257 ^ scoreProtTaxo=0.0 ^ scorePageRankTopoDiv=1.802341309156001E-4 (3)

class BIOSYNTHESIS IF : 1.8049705127885605<=scoreRea<=2.2188007849009166 ^ 0.764578403234384<=scoreProtTaxo<=5.384824552790179 ^ 6.709039841234334E-5<=scorePageRankTopoDiv<=9.583471926338623E-5 (11)

class BIOSYNTHESIS IF : scoreRea=1.0 ^ scoreProtTaxo=0.0 ^ 9.402345660909281E-5<=scorePageRankTopoDiv<=9.926965555736558E-5 (15)

class BIOSYNTHESIS IF : 2.23606797749979<=scoreRea<=7.656929634557929 ^ 829.709602515744<=scoreProtTaxo<=838.1623692966704 ^ 5.044682265188456E-4<=scorePageRankTopoDiv<=6.285287540492742E-4 (5)

class OTHER IF : scoreRea=0.2672612419124244 ^ scoreProtTaxo=15.042734593454881 ^ scorePageRankTopoDiv=2.8520335842968908E-5 (4)

class BIOSYNTHESIS IF : scoreRea=0.7071067811865476 ^ scoreProtTaxo=0.0 ^ 9.998233662201861E-5<=scorePageRankTopoDiv<=1.0691434479612118E-4 (15)

class DEGRADATION IF : 0.40206235255037975<=scoreRea<=0.4472135954999579 ^ 0.0<=scoreProtTaxo<=3.6283306109744204 ^ 5.334210778502402E-5<=scorePageRankTopoDiv<=5.489064449797292E-5 (21)

class OTHER IF : scoreRea=0.4472135954999579 ^ scoreProtTaxo=2.2071721740805414 ^ scorePageRankTopoDiv=9.480868540751403E-5 (1)

class OTHER IF : scoreRea=1.0910894511799618 ^ scoreProtTaxo=0.0 ^ scorePageRankTopoDiv=9.05851900355019E-5 (1)

class OTHER IF : scoreRea=1.0 ^ scoreProtTaxo=94.50752811024493 ^ scorePageRankTopoDiv=9.350711532682093E-5 (7)

class OTHER IF : scoreRea=0.816496580927726 ^ scoreProtTaxo=0.0 ^ scorePageRankTopoDiv=1.1357442447585103E-4 (7)

class OTHER IF : scoreRea=0.3333333333333333 ^ scoreProtTaxo=173.14680927853354 ^ scorePageRankTopoDiv=9.530736098891785E-5 (3)

class OTHER IF : scoreRea=0.6666666666666666 ^ scoreProtTaxo=32.70406736719196 ^ scorePageRankTopoDiv=1.0853718564050874E-4 (3)

class OTHER IF : 0.7359800721939872<=scoreRea<=0.7698907906800384 ^ 0.01197185426793928<=scoreProtTaxo<=0.4539913281784976 ^ 8.765155464331727E-5<=scorePageRankTopoDiv<=8.802148557582406E-5 (4)

class OTHER IF : scoreRea=0.5477225575051662 ^ scoreProtTaxo=67.24186839160802 ^ scorePageRankTopoDiv=1.0356937510804866E-4 (1)

class DEGRADATION IF : scoreRea=0.34641016151377546 ^ scoreProtTaxo=1.954747307721167 ^ scorePageRankTopoDiv=2.923556711062316E-5 (7)

class BIOSYNTHESIS IF : scoreRea=0.5940885257860046 ^ scoreProtTaxo=31.050431547115572 ^ scorePageRankTopoDiv=5.9365156338514805E-5 (2)

class BIOSYNTHESIS IF : 0.408248290463863<=scoreRea<=0.5535807194106618 ^ 1.886492471379138<=scoreProtTaxo<=4.371680783476537 ^ 4.325486328638982E-5<=scorePageRankTopoDiv<=5.251282995844052E-5 (8)

class BIOSYNTHESIS IF : 0.3131121455425747<=scoreRea<=0.6755998857764941 ^ 0.0019887525736357443<=scoreProtTaxo<=0.11342319195338982 ^ 4.757809234567175E-5<=scorePageRankTopoDiv<=5.0072739563688465E-5 (14)

class DEGRADATION IF : scoreRea=0.408248290463863 ^ scoreProtTaxo=30.77857385829824 ^ scorePageRankTopoDiv=5.145063627474733E-5 (2)

class BIOSYNTHESIS IF : 1.0<=scoreRea<=1.2060453783110545 ^ 190.02809180660955<=scoreProtTaxo<=197.63897849209104 ^ 7.706175889745562E-5<=scorePageRankTopoDiv<=1.085444445793927E-4 (13)

class DEGRADATION IF : 0.4703170810017723<=scoreRea<=0.6340037731068526 ^ 0.0<=scoreProtTaxo<=21.10622305327305 ^ 6.840979034833586E-5<=scorePageRankTopoDiv<=6.990584825898163E-5 (24)

class BIOSYNTHESIS IF : 0.28867513459481287<=scoreRea<=0.31562138431599956 ^ 1.3035718214630367<=scoreProtTaxo<=19.54048218001416 ^ 6.880899824267984E-5<=scorePageRankTopoDiv<=7.486846635608594E-5 (19)

class BIOSYNTHESIS IF : scoreRea=1.0 ^ 77.49602114288327<=scoreProtTaxo<=196.6616989567411 ^ 2.31633426121055E-4<=scorePageRankTopoDiv<=2.864973939882795E-4 (33)

class BIOSYNTHESIS IF : 0.7905694150420949<=scoreRea<=0.816496580927726 ^ scoreProtTaxo=0.0 ^ 6.518594657127604E-5<=scorePageRankTopoDiv<=7.234054889925801E-5

(17) class BIOSYNTHESIS IF : scoreRea=0.8498365855987975 ^ scoreProtTaxo=0.09349905172422704 ^ scorePageRankTopoDiv=1.985144240910256E-4 (1)

class BIOSYNTHESIS IF : scoreRea=1.0 ^ scoreProtTaxo=0.0 ^ scorePageRankTopoDiv=1.949995348430214E-4 (1)

class BIOSYNTHESIS IF : scoreRea=1.0 ^ scoreProtTaxo=0.0 ^ scorePageRankTopoDiv=1.949995348430214E-4 (1)

class BIOSYNTHESIS IF : scoreRea=1.0 ^ scoreProtTaxo=0.0 ^ scorePageRankTopoDiv=1.949995348430214E-4 (1)

class BIOSYNTHESIS IF : scoreRea=1.0 ^ scoreProtTaxo=0.0 ^ scorePageRankTopoDiv=1.949995348430214E-4 (1)

class BIOSYNTHESIS IF : scoreRea=1.0 ^ scoreProtTaxo=0.0 ^ scorePageRankTopoDiv=1.949995348430214E-4 (1)

class BIOSYNTHESIS IF : scoreRea=1.0 ^ scoreProtTaxo=0.0 ^ scorePageRankTopoDiv=1.9531762510013157E-4 (1)

class BIOSYNTHESIS IF : scoreRea=1.0 ^ scoreProtTaxo=0.0 ^ scorePageRankTopoDiv=1.9531762510013157E-4 (1)

class BIOSYNTHESIS IF : scoreRea=1.0 ^ scoreProtTaxo=0.0 ^ scorePageRankTopoDiv=1.9531762510013157E-4 (1)

class BIOSYNTHESIS IF : 0.816496580927726<=scoreRea<=1.0 ^ 47.76450951875451<=scoreProtTaxo<=50.98652966122344 ^ 2.1185263033224013E-4<=scorePageRankTopoDiv<=2.1600534257846586E-4 (8)

class BIOSYNTHESIS IF : scoreRea=1.0 ^ 36.540114942347955<=scoreProtTaxo<=82.17086870774837 ^ 1.937781347734718E-4<=scorePageRankTopoDiv<=1.9884189741881033E-4

(5) class BIOSYNTHESIS IF : scoreRea=1.0 ^ scoreProtTaxo=0.0 ^ scorePageRankTopoDiv=2.0858327937595459E-4 (3)

class DEGRADATION IF : 0.5<=scoreRea<=0.6666666666666666 ^ 0.0<=scoreProtTaxo<=0.23909335856687908 ^ 5.14245539920205E-5<=scorePageRankTopoDiv<=5.2248192997044404E-5 (2)

class DEGRADATION IF : scoreRea=0.5773502691896257 ^ scoreProtTaxo=10.708252269475352 ^ scorePageRankTopoDiv=4.3863073235157044E-5 (4)  
class DEGRADATION IF : scoreRea=0.5204164998665332 ^ scoreProtTaxo=0.016552321931456043 ^ scorePageRankTopoDiv=5.8244475092978616E-5 (3)  
class DEGRADATION IF : 0.4815434123430768<=scoreRea<=0.5270462766947299 ^ 5.302581851067899<=scoreProtTaxo<=26.991510355854377 ^ 4.416873060053648E-5<=scorePageRankTopoDiv<=4.553895986069906E-5 (8)  
class DEGRADATION IF : scoreRea=0.40206235255037975 ^ scoreProtTaxo=0.13622903541171683 ^ scorePageRankTopoDiv=4.997238646394681E-5 (2)  
class DEGRADATION IF : 0.3660422490704798<=scoreRea<=0.4009791936316524 ^ scoreProtTaxo=0.0 ^ 4.527498930521919E-5<=scorePageRankTopoDiv<=5.232264527040059E-5 (9)  
class DEGRADATION IF : scoreRea=0.5773502691896257 ^ scoreProtTaxo=14.091571161109593 ^ scorePageRankTopoDiv=5.12001351746207E-5 (3)  
class DEGRADATION IF : scoreRea=0.49507377148833714 ^ scoreProtTaxo=15.88328747496267 ^ scorePageRankTopoDiv=4.960844882259927E-5 (2)  
class DEGRADATION IF : 1.4142135623730951<=scoreRea<=1.479019945774904 ^ 111.3342879535984<=scoreProtTaxo<=166.54816786762024 ^ 7.25833440866257E-5<=scorePageRankTopoDiv<=1.0975966596067927E-4 (10)  
class BIOSYNTHESIS IF : 1.5075567228888183<=scoreRea<=2.603165493823874 ^ 5.269272036115494<=scoreProtTaxo<=119.16506409178824 ^ 2.3669319923014094E-4<=scorePageRankTopoDiv<=2.437145494220669E-4 (14)  
class DEGRADATION IF : 1.5811388300841898<=scoreRea<=2.6781362536479447 ^ 584.5628440521533<=scoreProtTaxo<=666.740154779605 ^ 1.157368098759784E-4<=scorePageRankTopoDiv<=1.225025970323636E-4 (10)  
class BIOSYNTHESIS IF : 1.632993161855452<=scoreRea<=1.6803361008336117 ^ 20.78385916888681<=scoreProtTaxo<=44.42351344438902 ^ 1.0010568571973802E-4<=scorePageRankTopoDiv<=1.1442075717380128E-4 (6)  
class DEGRADATION IF : 1.118033988749895<=scoreRea<=1.1547005383792515 ^ 0.0<=scoreProtTaxo<=14.184817258713263 ^ 6.002402324748907E-5<=scorePageRankTopoDiv<=6.562770578714856E-5 (8)  
class BIOSYNTHESIS IF : 0.8451542547285166<=scoreRea<=1.0 ^ 0.30623781212204<=scoreProtTaxo<=11.104941597822085 ^ 3.200660241923604E-4<=scorePageRankTopoDiv<=3.2727400494463895E-4 (16)  
class OTHER IF : scoreRea=1.1547005383792515 ^ scoreProtTaxo=155.03320327485167 ^ scorePageRankTopoDiv=5.203261468978073E-4 (4)  
class ENERGY IF : scoreRea=1.5275252316519465 ^ scoreProtTaxo=78.96656333862784 ^ scorePageRankTopoDiv=4.8518016538646547E-4 (6)  
class BIOSYNTHESIS IF : scoreRea=1.0 ^ scoreProtTaxo=98.47761194044129 ^ scorePageRankTopoDiv=1.957910023569396E-4 (4)  
class OTHER IF : scoreRea=1.6733200530681511 ^ scoreProtTaxo=134.6667040504943 ^ scorePageRankTopoDiv=2.477764007401312E-4 (4)  
class DEGRADATION IF : scoreRea=0.7071067811865476 ^ scoreProtTaxo=182.37761461514177 ^ scorePageRankTopoDiv=1.8050963412305737E-4 (5)  
class BIOSYNTHESIS IF : 2.0<=scoreRea<=3.599307891947848 ^ 24.143490363208702<=scoreProtTaxo<=30.982865119868915 ^ 1.4079240203545475E-4<=scorePageRankTopoDiv<=1.837625287804995E-4 (15)  
class BIOSYNTHESIS IF : scoreRea=1.0 ^ scoreProtTaxo=0.0 ^ 2.7176809938656905E-4<=scorePageRankTopoDiv<=2.78362307436891E-4 (13)  
class BIOSYNTHESIS IF : 0.8660254037844386<=scoreRea<=0.875 ^ 24.173221809594498<=scoreProtTaxo<=97.10127929827577 ^ 1.8046478519252122E-4<=scorePageRankTopoDiv<=1.893923822891509E-4 (10)  
class BIOSYNTHESIS IF : scoreRea=1.0 ^ scoreProtTaxo=62.08 ^ scorePageRankTopoDiv=1.7565831571757722E-4 (1)  
class BIOSYNTHESIS IF : scoreRea=1.0 ^ scoreProtTaxo=62.08 ^ scorePageRankTopoDiv=1.7565831571757722E-4 (1)  
class BIOSYNTHESIS IF : scoreRea=1.0 ^ scoreProtTaxo=62.08 ^ scorePageRankTopoDiv=1.7565831571757722E-4 (1)  
class BIOSYNTHESIS IF : scoreRea=1.0 ^ scoreProtTaxo=62.08 ^ scorePageRankTopoDiv=1.7565831571757722E-4 (1)  
class BIOSYNTHESIS IF : scoreRea=1.0 ^ scoreProtTaxo=62.08 ^ scorePageRankTopoDiv=1.7565831571757722E-4 (1)  
class BIOSYNTHESIS IF : scoreRea=1.0 ^ scoreProtTaxo=62.08 ^ scorePageRankTopoDiv=1.7565831571757722E-4 (1)  
class DEGRADATION IF : 1.0<=scoreRea<=1.2747548783981961 ^ 323.06434708214323<=scoreProtTaxo<=348.6018716603964 ^ 2.2611343905604424E-4<=scorePageRankTopoDiv<=2.394123836587127E-4 (12)  
class ENERGY IF : scoreRea=0.5499938233462375 ^ scoreProtTaxo=0.24390229293905932 ^ scorePageRankTopoDiv=9.226288738251106E-5 (2)  
class DEGRADATION IF : 1.0<=scoreRea<=2.0 ^ scoreProtTaxo=0.0 ^ 2.3317278855135453E-4<=scorePageRankTopoDiv<=2.3500344066533635E-4 (10)  
class BIOSYNTHESIS IF : scoreRea=1.4142135623730951 ^ scoreProtTaxo=133.96708783565958 ^ scorePageRankTopoDiv=6.738461316833523E-5 (4)  
class BIOSYNTHESIS IF : 1.4832396974191324<=scoreRea<=1.5811388300841898 ^ 59.895785832823506<=scoreProtTaxo<=95.77418042847671 ^ 7.888130487513908E-5<=scorePageRankTopoDiv<=8.290489402761552E-5 (6)  
class BIOSYNTHESIS IF : 0.8498365855987975<=scoreRea<=0.9409062968745655 ^ 0.0016810934937112564<=scoreProtTaxo<=0.06871710562352357 ^ 6.784842619768464E-5<=scorePageRankTopoDiv<=8.338034364305354E-5 (9)  
class BIOSYNTHESIS IF : scoreRea=0.8660254037844386 ^ scoreProtTaxo=0.0 ^ scorePageRankTopoDiv=4.579874297896567E-4 (5)  
class BIOSYNTHESIS IF : scoreRea=0.8944271909999159 ^ scoreProtTaxo=0.0 ^ scorePageRankTopoDiv=7.360444663747284E-5 (1)  
class BIOSYNTHESIS IF : scoreRea=1.0 ^ scoreProtTaxo=0.0 ^ scorePageRankTopoDiv=8.003254587501279E-5 (2)  
class BIOSYNTHESIS IF : 0.7559289460184544<=scoreRea<=0.7745966692414834 ^ 12.539028237715506<=scoreProtTaxo<=44.35291965001249 ^ 7.829635104071791E-5<=scorePageRankTopoDiv<=8.138212095481503E-5 (6)  
class BIOSYNTHESIS IF : scoreRea=1.0 ^ scoreProtTaxo=0.0 ^ scorePageRankTopoDiv=6.909731573460145E-5 (2)  
class BIOSYNTHESIS IF : 0.5686020318963798<=scoreRea<=1.0 ^ 1.17006376814294<=scoreProtTaxo<=15.116611197217916 ^ 6.222498549850633E-5<=scorePageRankTopoDiv<=6.792037491680598E-5 (25)  
class BIOSYNTHESIS IF : 0.7745966692414834<=scoreRea<=0.8401680504168059 ^ 0.0<=scoreProtTaxo<=0.02560781728536047 ^ 7.752753433104671E-5<=scorePageRankTopoDiv<=8.090769330609419E-5 (17)  
class BIOSYNTHESIS IF : 0.9746794344808964<=scoreRea<=1.0677078252031313 ^ 14.589835855947749<=scoreProtTaxo<=23.80429742569377 ^ 7.06951028591058E-5<=scorePageRankTopoDiv<=8.300133176747531E-5 (12)  
class BIOSYNTHESIS IF : scoreRea=0.8498365855987975 ^ scoreProtTaxo=0.177013407153926 ^ scorePageRankTopoDiv=7.63505306242672E-5 (4)  
class BIOSYNTHESIS IF : 0.8660254037844386<=scoreRea<=0.9337945803757379 ^ 1.6061868465479219<=scoreProtTaxo<=4.494491622781928 ^ 7.529262716106472E-5<=scorePageRankTopoDiv<=8.297530221176349E-5 (15)  
class BIOSYNTHESIS IF : 0.9128709291752768<=scoreRea<=0.9393364366277243 ^ scoreProtTaxo=0.0 ^ 6.770404143475374E-5<=scorePageRankTopoDiv<=8.093676806635258E-5 (15)  
class BIOSYNTHESIS IF : scoreRea=0.8944271909999159 ^ scoreProtTaxo=0.0 ^ scorePageRankTopoDiv=7.360444663747284E-5 (1)  
class BIOSYNTHESIS IF : scoreRea=0.8944271909999159 ^ scoreProtTaxo=0.0 ^ scorePageRankTopoDiv=7.360444663747284E-5 (1)  
class BIOSYNTHESIS IF : scoreRea=0.8944271909999159 ^ scoreProtTaxo=0.0 ^ scorePageRankTopoDiv=7.360444663747284E-5 (1)  
class BIOSYNTHESIS IF : scoreRea=0.8944271909999159 ^ scoreProtTaxo=0.0 ^ scorePageRankTopoDiv=7.360444663747284E-5 (1)  
class BIOSYNTHESIS IF : scoreRea=0.8944271909999159 ^ scoreProtTaxo=0.0 ^ scorePageRankTopoDiv=7.360444663747284E-5 (1)

class DEGRADATION IF : 1.632993161855452<=scoreRea<=2.091650066335189 ^ 191.5456894304651<=scoreProtTaxo<=210.79414812610932 ^ 4.456873199567818E-5<=scorePageRankTopoDiv<=1.0264834960969904E-4 (13)

class DEGRADATION IF : scoreRea=0.816496580927726 ^ scoreProtTaxo=0.0 ^ scorePageRankTopoDiv=1.1563460165761201E-4 (8)

class BIOSYNTHESIS IF : scoreRea=0.816496580927726 ^ scoreProtTaxo=0.0 ^ 1.0779997582493334E-4<=scorePageRankTopoDiv<=1.088867514795E-4 (8)

class DEGRADATION IF : scoreRea=0.408248290463863 ^ 693.9891871031006<=scoreProtTaxo<=693.9891871031007 ^ scorePageRankTopoDiv=3.965053058062261E-5 (5)

class BIOSYNTHESIS IF : scoreRea=1.3764944032233706 ^ scoreProtTaxo=0.0 ^ scorePageRankTopoDiv=1.297047059087296E-4 (3)

class BIOSYNTHESIS IF : 2.0816659994661326<=scoreRea<=2.3717082451262845 ^ scoreProtTaxo=0.0 ^ 5.9536362836406984E-5<=scorePageRankTopoDiv<=6.25878900045181E-5 (7)

class DEGRADATION IF : scoreRea=1.0 ^ scoreProtTaxo=0.0 ^ 1.586188952919566E-4<=scorePageRankTopoDiv<=1.6139523269247927E-4 (9)

class DEGRADATION IF : scoreRea=0.7071067811865476 ^ scoreProtTaxo=0.0 ^ scorePageRankTopoDiv=1.600797153717709E-4 (6)

class OTHER IF : scoreRea=0.5773502691896257 ^ scoreProtTaxo=273.0486322170335 ^ scorePageRankTopoDiv=1.231543277680165E-4 (4)

class OTHER IF : scoreRea=0.5773502691896257 ^ scoreProtTaxo=0.0 ^ scorePageRankTopoDiv=1.563974202385334E-4 (3)

class DEGRADATION IF : scoreRea=1.0 ^ scoreProtTaxo=0.0 ^ 1.2335250775941675E-4<=scorePageRankTopoDiv<=1.265765156839868E-4 (16)

class DEGRADATION IF : 0.3279129178919765<=scoreRea<=0.3472581680740104 ^ 0.7273447634270425<=scoreProtTaxo<=8.65324902488168 ^ 3.5399426680855433E-5<=scorePageRankTopoDiv<=3.606821312576429E-5 (8)

class DEGRADATION IF : 0.05455447255899809<=scoreRea<=0.2932942300427066 ^ 0.25293043138551174<=scoreProtTaxo<=0.33751706318369323 ^ 3.2713651128993574E-5<=scorePageRankTopoDiv<=3.28222925273825E-5 (6)

class DEGRADATION IF : 0.19851666679418606<=scoreRea<=0.23186944788008415 ^ 0.6566412741523572<=scoreProtTaxo<=0.7369488592380905 ^ 2.59483006037133E-5<=scorePageRankTopoDiv<=4.8209446960439775E-5 (8)

class BIOSYNTHESIS IF : 1.0<=scoreRea<=1.2680075462137053 ^ 4.603361687122849<=scoreProtTaxo<=41.2899157526239 ^ 1.0821870668621276E-4<=scorePageRankTopoDiv<=1.1191554303089209E-4 (15)

class ENERGY IF : scoreRea=1.0 ^ 1.9240469741764585<=scoreProtTaxo<=3.0367993898542833 ^ 2.795286934123438E-4<=scorePageRankTopoDiv<=2.802591027677582E-4 (11)

class BIOSYNTHESIS IF : 0.8660254037844386<=scoreRea<=1.0 ^ 497.4811236160592<=scoreProtTaxo<=602.306197130625 ^ 1.541920177321397E-4<=scorePageRankTopoDiv<=1.8564108971871575E-4 (16)

class BIOSYNTHESIS IF : scoreRea=0.8451542547285166 ^ scoreProtTaxo=56.932828304728304 ^ scorePageRankTopoDiv=2.157200922979042E-4 (8)

class DEGRADATION IF : scoreRea=0.5 ^ 57.502569112561936<=scoreProtTaxo<=121.94027845951078 ^ 1.128535739524047E-4<=scorePageRankTopoDiv<=1.1651066441705652E-4 (12)

class ENERGY IF : scoreRea=1.0 ^ scoreProtTaxo=0.0 ^ scorePageRankTopoDiv=2.541628528851764E-4 (5)

class BIOSYNTHESIS IF : 0.14907119849998599<=scoreRea<=0.19069251784911848 ^ scoreProtTaxo=0.0 ^ 1.1983187389885847E-4<=scorePageRankTopoDiv<=1.2350455368527547E-4 (17)

class BIOSYNTHESIS IF : 1.0<=scoreRea<=1.1547005383792515 ^ 341.9994152038561<=scoreProtTaxo<=432.5671693840806 ^ 1.3935397686345004E-4<=scorePageRankTopoDiv<=2.0186555161189252E-4 (13)

class DEGRADATION IF : scoreRea=1.0 ^ scoreProtTaxo=49.001253116811654 ^ scorePageRankTopoDiv=2.1604982948739978E-4 (4)

class BIOSYNTHESIS IF : scoreRea=2.1821789023599236 ^ 39.831974039532746<=scoreProtTaxo<=179.69948040487637 ^ 1.2335020656697353E-4<=scorePageRankTopoDiv<=1.2529655370089888E-4 (9)

class DEGRADATION IF : 0.3779644730092272<=scoreRea<=2.8284271247461903 ^ 177.27383616031477<=scoreProtTaxo<=803.3713373151944 ^ 4.885814936234887E-4<=scorePageRankTopoDiv<=9.091077403187453E-4 (24)

class BIOSYNTHESIS IF : 1.6803361008336117<=scoreRea<=1.7320508075688772 ^ scoreProtTaxo=0.0 ^ 8.121377612071065E-5<=scorePageRankTopoDiv<=1.603705539214256E-4 (27)

class BIOSYNTHESIS IF : scoreRea=0.28867513459481287 ^ scoreProtTaxo=0.0 ^ scorePageRankTopoDiv=4.585763562318558E-5 (5)

class BIOSYNTHESIS IF : scoreRea=1.0 ^ scoreProtTaxo=121.67338448569586 ^ scorePageRankTopoDiv=3.04041959804783E-4 (1)

class BIOSYNTHESIS IF : scoreRea=1.4142135623730951 ^ scoreProtTaxo=0.0 ^ scorePageRankTopoDiv=2.986663014466144E-4 (4)

class BIOSYNTHESIS IF : 1.4719601443879744<=scoreRea<=2.3664319132398464 ^ 45.53429513784011<=scoreProtTaxo<=932.2968192705277 ^ 3.044045057770998E-4<=scorePageRankTopoDiv<=3.140651876434628E-4 (10)

class BIOSYNTHESIS IF : scoreRea=0.5773502691896257 ^ 78.53198537713274<=scoreProtTaxo<=225.0807262591772 ^ 2.937946919422816E-4<=scorePageRankTopoDiv<=2.942659660207085E-4 (3)

class BIOSYNTHESIS IF : scoreRea=1.0 ^ scoreProtTaxo=285.99815137299225 ^ scorePageRankTopoDiv=2.923036083262068E-4 (1)

class BIOSYNTHESIS IF : 0.5773502691896257<=scoreRea<=0.7071067811865476 ^ 26.41275546024839<=scoreProtTaxo<=35.66680826927385 ^ 1.6856849441304446E-4<=scorePageRankTopoDiv<=2.937946919422816E-4 (12)

class BIOSYNTHESIS IF : scoreRea=1.0 ^ scoreProtTaxo=0.0 ^ 2.852833775240388E-4<=scorePageRankTopoDiv<=2.928124535837693E-4 (8)

class BIOSYNTHESIS IF : 0.5773502691896257<=scoreRea<=1.0 ^ 45.09288417624395<=scoreProtTaxo<=54.4827917683569 ^ 2.8113486581252486E-4<=scorePageRankTopoDiv<=2.932166491447716E-4 (4)

class BIOSYNTHESIS IF : 0.816496580927726<=scoreRea<=1.0 ^ 219.6139314557716<=scoreProtTaxo<=313.8967414084758 ^ 3.0475815198214423E-4<=scorePageRankTopoDiv<=4.330581559433888E-4 (14)

class BIOSYNTHESIS IF : scoreRea=1.0 ^ scoreProtTaxo=121.67338448569586 ^ scorePageRankTopoDiv=3.04041959804783E-4 (1)

class BIOSYNTHESIS IF : scoreRea=1.0 ^ scoreProtTaxo=121.67338448569586 ^ scorePageRankTopoDiv=3.04041959804783E-4 (1)

class BIOSYNTHESIS IF : scoreRea=1.0 ^ scoreProtTaxo=121.67338448569586 ^ scorePageRankTopoDiv=3.04041959804783E-4 (1)

class BIOSYNTHESIS IF : scoreRea=1.0 ^ scoreProtTaxo=121.67338448569586 ^ scorePageRankTopoDiv=3.04041959804783E-4 (1)

class BIOSYNTHESIS IF : scoreRea=1.0 ^ scoreProtTaxo=121.67338448569586 ^ scorePageRankTopoDiv=3.04041959804783E-4 (1)

class BIOSYNTHESIS IF : scoreRea=1.0 ^ scoreProtTaxo=121.67338448569586 ^ scorePageRankTopoDiv=3.04041959804783E-4 (1)

class BIOSYNTHESIS IF : scoreRea=1.0627378626481143 ^ scoreProtTaxo=14.486564680584186 ^ scorePageRankTopoDiv=9.949604816272946E-5 (2)

class BIOSYNTHESIS IF : 1.5491933384829668<=scoreRea<=2.1821789023599236 ^ 142.8863813467606<=scoreProtTaxo<=185.9283985016919 ^ 7.862328457920213E-5<=scorePageRankTopoDiv<=9.674459453709227E-5 (12)

class BIOSYNTHESIS IF : scoreRea=1.5811388300841898 ^ scoreProtTaxo=0.0 ^ 1.0832471275904642E-4<=scorePageRankTopoDiv<=2.1066550166109774E-4 (10)

class BIOSYNTHESIS IF : 1.0<=scoreRea<=1.4638501094227998 ^ 12.14962939259461<=scoreProtTaxo<=108.73214139078968 ^ 1.0053122452362036E-4<=scorePageRankTopoDiv<=1.0546017914666305E-4 (21)

class BIOSYNTHESIS IF : 0.2721655269759087<=scoreRea<=0.3333333333333333 ^ 0.05036843346547486<=scoreProtTaxo<=13.077240249309709 ^ 8.138689745012818E-5<=scorePageRankTopoDiv<=8.319487741294502E-5 (5)

class DEGRADATION IF : scoreRea=0.7071067811865476 ^ scoreProtTaxo=682.9083793205016 ^ scorePageRankTopoDiv=2.872901893809181E-4 (3)  
class BIOSYNTHESIS IF : scoreRea=1.0 ^ scoreProtTaxo=0.0 ^ scorePageRankTopoDiv=1.3216355016187466E-4 (3)  
class BIOSYNTHESIS IF : scoreRea=1.0 ^ scoreProtTaxo=0.0 ^ scorePageRankTopoDiv=1.1483565662018686E-4 (1)  
class BIOSYNTHESIS IF : scoreRea=1.0 ^ scoreProtTaxo=0.0 ^ scorePageRankTopoDiv=1.1483565662018686E-4 (1)  
class BIOSYNTHESIS IF : scoreRea=1.0 ^ scoreProtTaxo=0.0 ^ scorePageRankTopoDiv=1.1483565662018686E-4 (1)  
class BIOSYNTHESIS IF : scoreRea=1.0 ^ scoreProtTaxo=0.0 ^ scorePageRankTopoDiv=1.1483565662018686E-4 (1)  
class BIOSYNTHESIS IF : 0.9860132971832692<=scoreRea<=1.1881770515720091 ^ 7.361536602560318<=scoreProtTaxo<=25.652671227146858 ^ 1.1411806238879287E-4<=scorePageRankTopoDiv<=1.1821792846611631E-4 (12)  
class BIOSYNTHESIS IF : scoreRea=1.0 ^ scoreProtTaxo=0.0 ^ scorePageRankTopoDiv=1.1999325120544981E-4 (1)  
class BIOSYNTHESIS IF : scoreRea=1.0 ^ scoreProtTaxo=0.0 ^ scorePageRankTopoDiv=1.1999325120544981E-4 (1)  
class BIOSYNTHESIS IF : scoreRea=1.0 ^ scoreProtTaxo=0.0 ^ scorePageRankTopoDiv=1.1999325120544981E-4 (1)  
class BIOSYNTHESIS IF : scoreRea=0.30151134457776363 ^ scoreProtTaxo=2.507459960924724 ^ scorePageRankTopoDiv=1.315802702417396E-4 (3)  
class BIOSYNTHESIS IF : scoreRea=0.45199676466631616 ^ scoreProtTaxo=0.0 ^ scorePageRankTopoDiv=3.5221281088250244E-5 (4)  
class DEGRADATION IF : scoreRea=1.4142135623730951 ^ scoreProtTaxo=0.0 ^ scorePageRankTopoDiv=3.3482641633356434E-4 (3)  
class DEGRADATION IF : scoreRea=0.7071067811865476 ^ scoreProtTaxo=0.0 ^ scorePageRankTopoDiv=2.531695890641126E-4 (2)  
class BIOSYNTHESIS IF : scoreRea=0.6488856845230502 ^ scoreProtTaxo=0.0 ^ scorePageRankTopoDiv=7.864916424241607E-5 (2)  
class BIOSYNTHESIS IF : scoreRea=0.5865884600854132 ^ scoreProtTaxo=0.016846010778338756 ^ scorePageRankTopoDiv=9.209075396229983E-5 (6)  
class DEGRADATION IF : scoreRea=1.0 ^ scoreProtTaxo=0.0 ^ scorePageRankTopoDiv=2.609763911820804E-4 (1)  
class DEGRADATION IF : scoreRea=1.4142135623730951 ^ scoreProtTaxo=0.0 ^ scorePageRankTopoDiv=2.2111995434628557E-4 (2)  
class DEGRADATION IF : 0.816496580927726<=scoreRea<=1.0 ^ scoreProtTaxo=0.0 ^ 2.109525286325407E-4<=scorePageRankTopoDiv<=2.156046925054501E-4 (8)  
class DEGRADATION IF : scoreRea=0.3535533905932738 ^ scoreProtTaxo=28.234455298768772 ^ scorePageRankTopoDiv=2.8703446527435645E-4 (1)  
class DEGRADATION IF : scoreRea=0.7071067811865476 ^ scoreProtTaxo=0.0 ^ 2.2527573199519746E-4<=scorePageRankTopoDiv<=2.2746501665296874E-4 (5)  
class DEGRADATION IF : scoreRea=0.8819171036881968 ^ scoreProtTaxo=49.44565641564656 ^ scorePageRankTopoDiv=2.2699784921029255E-4 (4)  
class DEGRADATION IF : scoreRea=1.632993161855452 ^ scoreProtTaxo=0.0 ^ scorePageRankTopoDiv=2.5577683916162976E-4 (1)  
class DEGRADATION IF : scoreRea=1.0 ^ scoreProtTaxo=130.2781338404075 ^ scorePageRankTopoDiv=2.89016577371395E-4 (3)  
class DEGRADATION IF : scoreRea=1.224744871391589 ^ scoreProtTaxo=0.0 ^ scorePageRankTopoDiv=2.8718895603203323E-4 (5)  
class DEGRADATION IF : 0.4472135954999579<=scoreRea<=0.5 ^ 26.098002609031003<=scoreProtTaxo<=61.54997969131992 ^ 2.0504604532525092E-4<=scorePageRankTopoDiv<=2.9372551216232394E-4 (10)  
class DEGRADATION IF : scoreRea=1.0 ^ scoreProtTaxo=0.0 ^ scorePageRankTopoDiv=2.8232844640266373E-4 (1)  
class DEGRADATION IF : scoreRea=1.0 ^ scoreProtTaxo=0.0 ^ scorePageRankTopoDiv=2.405203763478195E-4 (3)  
class BIOSYNTHESIS IF : scoreRea=1.2909944487358056 ^ scoreProtTaxo=7.863722682721194 ^ scorePageRankTopoDiv=4.7724352816539794E-4 (3)  
class BIOSYNTHESIS IF : scoreRea=0.7071067811865476 ^ scoreProtTaxo=174.41293300255478 ^ scorePageRankTopoDiv=4.233778112332431E-4 (1)  
class BIOSYNTHESIS IF : scoreRea=1.4142135623730951 ^ scoreProtTaxo=0.0 ^ scorePageRankTopoDiv=3.7182091341019847E-4 (3)  
class BIOSYNTHESIS IF : scoreRea=1.0 ^ scoreProtTaxo=0.0 ^ scorePageRankTopoDiv=3.642818610374926E-4 (1)  
class BIOSYNTHESIS IF : scoreRea=1.0 ^ scoreProtTaxo=0.0 ^ scorePageRankTopoDiv=3.642818610374926E-4 (1)  
class DEGRADATION IF : scoreRea=0.5 ^ scoreProtTaxo=0.0 ^ scorePageRankTopoDiv=7.09543945507385E-5 (4)  
class DEGRADATION IF : 0.2773500981126146<=scoreRea<=0.29277002188455997 ^ 51.76085988447591<=scoreProtTaxo<=79.27139361808803 ^ 2.9101694011063927E-5<=scorePageRankTopoDiv<=4.9277085691789035E-5 (7)  
class DEGRADATION IF : scoreRea=0.30403449605253013 ^ scoreProtTaxo=0.0 ^ scorePageRankTopoDiv=3.188925859954084E-5 (4)  
class DEGRADATION IF : 0.28867513459481287<=scoreRea<=0.3535533905932738 ^ scoreProtTaxo=0.0 ^ 2.8531030310799123E-5<=scorePageRankTopoDiv<=2.915896725059666E-5 (8)  
class DEGRADATION IF : 0.31154265122036146<=scoreRea<=0.3660422490704798 ^ 0.0<=scoreProtTaxo<=0.18601989901028204 ^ 3.086599717478484E-5<=scorePageRankTopoDiv<=3.1162427507990004E-5 (5)  
class DEGRADATION IF : scoreRea=0.3535533905932738 ^ 18.295026892033253<=scoreProtTaxo<=135.57699032842908 ^ 3.549749858825105E-5<=scorePageRankTopoDiv<=3.687615953751601E-5 (4)  
class DEGRADATION IF : scoreRea=0.4472135954999579 ^ scoreProtTaxo=0.0 ^ scorePageRankTopoDiv=3.891465433234945E-5 (3)  
class DEGRADATION IF : 0.4472135954999579<=scoreRea<=0.6030226891555273 ^ 14.88877232157643<=scoreProtTaxo<=25.93340227167837 ^ 2.719160309303253E-5<=scorePageRankTopoDiv<=3.413336931846702E-5 (10)  
class DEGRADATION IF : 2.0<=scoreRea<=2.449489742783178 ^ scoreProtTaxo=0.0 ^ 7.75568091423706E-5<=scorePageRankTopoDiv<=9.184702952142395E-5 (4)  
class OTHER IF : 1.3333333333333333<=scoreRea<=2.449489742783178 ^ 12.23396062108038<=scoreProtTaxo<=196.6616989567411 ^ 3.1706889880715245E-4<=scorePageRankTopoDiv<=3.2628709644987394E-4 (15)  
class BIOSYNTHESIS IF : scoreRea=0.408248290463863 ^ scoreProtTaxo=17.289366675040693 ^ scorePageRankTopoDiv=2.6039275168697428E-5 (8)  
class BIOSYNTHESIS IF : scoreRea=2.0 ^ scoreProtTaxo=404.46246448531906 ^ scorePageRankTopoDiv=4.133797272255148E-4 (1)  
class BIOSYNTHESIS IF : 2.6233033431358117<=scoreRea<=3.3189795118379384 ^ 0.018034925656415072<=scoreProtTaxo<=0.03610143342723248 ^ 2.296284898681343E-4<=scorePageRankTopoDiv<=4.167988354063402E-4 (6)  
class BIOSYNTHESIS IF : 1.4142135623730951<=scoreRea<=1.7320508075688772 ^ scoreProtTaxo=0.0 ^ 4.3390899382588383E-4<=scorePageRankTopoDiv<=5.594139963627898E-4 (8)  
class BIOSYNTHESIS IF : 2.4748737341529163<=scoreRea<=2.54000254000381 ^ 0.9842135491902679<=scoreProtTaxo<=83.28699216797433 ^ 3.831836775900027E-4<=scorePageRankTopoDiv<=3.9007559818462736E-4 (2)  
class BIOSYNTHESIS IF : scoreRea=1.0 ^ scoreProtTaxo=0.0 ^ 6.301529812221773E-5<=scorePageRankTopoDiv<=6.679401603124203E-5 (5)  
class DEGRADATION IF : 0.2478788664079178<=scoreRea<=0.3637867197989336 ^ 0.10714265193236548<=scoreProtTaxo<=0.3162759272716693 ^ 6.607743171125309E-5<=scorePageRankTopoDiv<=6.844104169344639E-5 (6)  
class BIOSYNTHESIS IF : 2.449489742783178<=scoreRea<=4.558423058385518 ^ 47.09028349250943<=scoreProtTaxo<=192.5298544265061 ^ 1.0265239631480663E-4<=scorePageRankTopoDiv<=1.0519340961076511E-4 (6)  
class BIOSYNTHESIS IF : 0.5477225575051662<=scoreRea<=0.7071067811865476 ^ 23.04241130879896<=scoreProtTaxo<=25.763761925834835 ^ 6.524395329840937E-5<=scorePageRankTopoDiv<=7.127803006092852E-5 (3)  
class DEGRADATION IF : 0.26111648393354675<=scoreRea<=0.2626128657194451 ^ 10.200574818917099<=scoreProtTaxo<=58.56007336799859 ^ 4.156525024183641E-5<=scorePageRankTopoDiv<=5.010702370674141E-5 (5)



class BIOSYNTHESIS IF : scoreRea=0.3872983346207417 ^ scoreProtTaxo=14.062439847057187 ^ scorePageRankTopoDiv=3.57718714206892E-5 (13)  
class BIOSYNTHESIS IF : 0.3457459036417604<=scoreRea<=0.35805743701971643 ^ 12.185683561383481<=scoreProtTaxo<=60.85843502945625 ^ 3.949727682687551E-5<=scorePageRankTopoDiv<=4.8160184062752934E-5 (9)  
class BIOSYNTHESIS IF : scoreRea=0.31622776601683794 ^ scoreProtTaxo=40.35275850475697 ^ scorePageRankTopoDiv=3.873442937778711E-5 (1)  
class BIOSYNTHESIS IF : scoreRea=0.1224744871391589 ^ scoreProtTaxo=20.90744024523745 ^ scorePageRankTopoDiv=3.659757676415439E-5 (5)  
class BIOSYNTHESIS IF : scoreRea=0.21693045781865616 ^ scoreProtTaxo=1.581334155432704 ^ scorePageRankTopoDiv=3.84149619368706E-5 (2)  
class BIOSYNTHESIS IF : scoreRea=0.2581988897471611 ^ scoreProtTaxo=7.811297292035066 ^ scorePageRankTopoDiv=3.7324173731263076E-5 (2)  
class BIOSYNTHESIS IF : 0.2672612419124244<=scoreRea<=0.2773500981126146 ^ 15.767142540186411<=scoreProtTaxo<=60.83421144432251 ^ 2.227982915180602E-5<=scorePageRankTopoDiv<=2.8170111704260316E-5 (16)  
class DEGRADATION IF : scoreRea=0.2282177322938192 ^ scoreProtTaxo=0.0 ^ scorePageRankTopoDiv=3.0179017746654186E-5 (1)  
class DEGRADATION IF : 0.5773502691896257<=scoreRea<=0.6454972243679027 ^ 0.0<=scoreProtTaxo<=0.3172590498740863 ^ 7.422303094299724E-5<=scorePageRankTopoDiv<=8.034981572344388E-5 (8)  
class BIOSYNTHESIS IF : 0.2041241452319315<=scoreRea<=0.3578810105803186 ^ 0.0<=scoreProtTaxo<=1.4727924657147426 ^ 5.965447660311724E-5<=scorePageRankTopoDiv<=6.308082194836142E-5 (13)  
class ENERGY IF : 0.7385489458759964<=scoreRea<=0.7912565680749444 ^ 24.12140312237191<=scoreProtTaxo<=71.73402074191125 ^ 1.7392856210161315E-4<=scorePageRankTopoDiv<=2.1357981861322832E-4 (10)  
class DEGRADATION IF : scoreRea=2.0 ^ scoreProtTaxo=8.959013470267083 ^ scorePageRankTopoDiv=2.608700894174257E-4 (3)  
class DEGRADATION IF : scoreRea=0.28867513459481287 ^ scoreProtTaxo=0.0 ^ scorePageRankTopoDiv=4.605630158757446E-5 (2)  
class BIOSYNTHESIS IF : scoreRea=0.19245008972987526 ^ scoreProtTaxo=32.10799423357924 ^ scorePageRankTopoDiv=8.527890121925288E-5 (4)  
class ENERGY IF : scoreRea=0.24253562503633297 ^ scoreProtTaxo=2.2987411082902036 ^ scorePageRankTopoDiv=2.466515140945271E-5 (2)  
class BIOSYNTHESIS IF : scoreRea=0.6009252125773316 ^ scoreProtTaxo=0.1446951787120938 ^ scorePageRankTopoDiv=1.4356825744751527E-4 (2)  
class BIOSYNTHESIS IF : 0.408248290463863<=scoreRea<=0.4472135954999579 ^ scoreProtTaxo=0.0 ^ 1.0936108451902584E-4<=scorePageRankTopoDiv<=1.1208874171937474E-4 (12)  
class OTHER IF : 1.0<=scoreRea<=1.7320508075688772 ^ scoreProtTaxo=0.0 ^ 5.844004545899021E-4<=scorePageRankTopoDiv<=5.926013986908866E-4 (7)  
class DEGRADATION IF : 3.2071349029490923<=scoreRea<=3.4641016151377544 ^ scoreProtTaxo=0.0 ^ 7.84789069021558E-5<=scorePageRankTopoDiv<=1.700829014660686E-4 (17)  
class BIOSYNTHESIS IF : 0.06537204504606135<=scoreRea<=0.10741723110591495 ^ 19.350235633395865<=scoreProtTaxo<=126.00744288078114 ^ 6.66200616101798E-5<=scorePageRankTopoDiv<=8.067388019590874E-5 (20)  
class OTHER IF : scoreRea=1.0954451150103324 ^ scoreProtTaxo=0.0 ^ scorePageRankTopoDiv=8.47493446785784E-5 (1)  
class DEGRADATION IF : scoreRea=2.0976176963403033 ^ scoreProtTaxo=91.32623089960902 ^ scorePageRankTopoDiv=1.8669124202801856E-4 (4)  
class DEGRADATION IF : scoreRea=0.3086066999241838 ^ scoreProtTaxo=43.62489741937418 ^ scorePageRankTopoDiv=4.394931004141637E-5 (3)  
class BIOSYNTHESIS IF : scoreRea=0.408248290463863 ^ 0.1693690883496217<=scoreProtTaxo<=55.94009746764132 ^ 1.2915211751054413E-4<=scorePageRankTopoDiv<=1.318723082960551E-4 (2)  
class BIOSYNTHESIS IF : 0.31622776601683794<=scoreRea<=0.3892494720807615 ^ 0.0<=scoreProtTaxo<=0.8046255931149046 ^ 1.256658419610188E-4<=scorePageRankTopoDiv<=1.2611462768251616E-4 (3)  
class BIOSYNTHESIS IF : 0.14824986333222023<=scoreRea<=0.408248290463863 ^ 20.91549697888896<=scoreProtTaxo<=33.39177500970544 ^ 9.893705866072709E-5<=scorePageRankTopoDiv<=1.0299665425326959E-4 (5)  
class DETOX IF : scoreRea=1.7320508075688772 ^ scoreProtTaxo=0.0 ^ scorePageRankTopoDiv=2.5605297194339116E-4 (3)  
class BIOSYNTHESIS IF : 1.4142135623730951<=scoreRea<=8.090398349558905 ^ 0.0<=scoreProtTaxo<=34.94361669771234 ^ 6.113644840014297E-4<=scorePageRankTopoDiv<=6.86861693231527E-4 (11)  
class BIOSYNTHESIS IF : 0.3779644730092272<=scoreRea<=0.40206235255037975 ^ 0.0<=scoreProtTaxo<=0.6415802624320309 ^ 4.10208090166561E-5<=scorePageRankTopoDiv<=4.4058285781172826E-5 (8)  
class OTHER IF : scoreRea=0.3429971702850177 ^ scoreProtTaxo=12.779161504403755 ^ scorePageRankTopoDiv=2.709465462200697E-5 (4)  
class BIOSYNTHESIS IF : 0.9039935293326323<=scoreRea<=0.9117917111913264 ^ 0.014986097067932382<=scoreProtTaxo<=0.12752196982754047 ^ 5.562663384351787E-5<=scorePageRankTopoDiv<=6.28153376933005E-5 (7)  
class DEGRADATION IF : 2.100420126042015<=scoreRea<=2.309401076758503 ^ 0.27763102616899094<=scoreProtTaxo<=20.427731716836988 ^ 1.0491226408433257E-4<=scorePageRankTopoDiv<=1.5280871764678444E-4 (8)  
class BIOSYNTHESIS IF : 0.5<=scoreRea<=0.7071067811865476 ^ 63.563996258345064<=scoreProtTaxo<=121.17298334143021 ^ 5.0986526676321536E-5<=scorePageRankTopoDiv<=5.673579070415349E-5 (14)  
class OTHER IF : scoreRea=1.0 ^ scoreProtTaxo=98.47761194044129 ^ scorePageRankTopoDiv=1.8256592974131777E-4 (6)  
class BIOSYNTHESIS IF : 0.1386750490563073<=scoreRea<=0.15191090506255 ^ 178.2014346819538<=scoreProtTaxo<=295.8907046596878 ^ 1.1409009550231638E-4<=scorePageRankTopoDiv<=1.3709365853150742E-4 (7)  
class BIOSYNTHESIS IF : scoreRea=0.7071067811865476 ^ scoreProtTaxo=0.0 ^ scorePageRankTopoDiv=1.6282912934427522E-4 (1)  
class BIOSYNTHESIS IF : scoreRea=0.4472135954999579 ^ scoreProtTaxo=41.94715730728113 ^ scorePageRankTopoDiv=1.6197739285580512E-4 (1)  
class BIOSYNTHESIS IF : scoreRea=0.6201736729460423 ^ scoreProtTaxo=0.0 ^ scorePageRankTopoDiv=1.4969734830735088E-4 (4)  
class BIOSYNTHESIS IF : 0.5773502691896257<=scoreRea<=0.7071067811865476 ^ 54.014760540597656<=scoreProtTaxo<=473.23239832180855 ^ 1.6067019311958588E-4<=scorePageRankTopoDiv<=1.689506791098228E-4 (17)  
class BIOSYNTHESIS IF : scoreRea=0.7071067811865476 ^ scoreProtTaxo=0.0 ^ scorePageRankTopoDiv=1.6282912934427522E-4 (1)  
class BIOSYNTHESIS IF : scoreRea=0.7071067811865476 ^ scoreProtTaxo=0.0 ^ scorePageRankTopoDiv=1.6282912934427522E-4 (1)  
class BIOSYNTHESIS IF : scoreRea=0.7071067811865476 ^ scoreProtTaxo=0.0 ^ scorePageRankTopoDiv=1.6282912934427522E-4 (1)  
class DEGRADATION IF : scoreRea=0.18257418583505536 ^ scoreProtTaxo=22.268720038735957 ^ scorePageRankTopoDiv=6.369478121980365E-5 (1)  
class DEGRADATION IF : 0.30950774330130126<=scoreRea<=0.35007002100700246 ^ 0.2474538250752462<=scoreProtTaxo<=19.268303014858162 ^ 7.648579923948595E-5<=scorePageRankTopoDiv<=7.952826632257314E-5 (7)  
class DEGRADATION IF : scoreRea=0.21320071635561044 ^ scoreProtTaxo=21.764641378281617 ^ scorePageRankTopoDiv=7.768413224144437E-5 (3)  
class DEGRADATION IF : scoreRea=0.14213381090374028 ^ scoreProtTaxo=113.04884267889307 ^ scorePageRankTopoDiv=7.340639209575947E-5 (3)  
class DEGRADATION IF : scoreRea=0.3039305703971088 ^ scoreProtTaxo=0.056819613421865284 ^ scorePageRankTopoDiv=5.170939021601188E-5 (5)  
class DEGRADATION IF : scoreRea=0.2041241452319315 ^ scoreProtTaxo=40.89029742320763 ^ scorePageRankTopoDiv=5.026181979438789E-5 (2)

(12) class DEGRADATION IF : 0.11605177063713189<=scoreRea<=0.19069251784911848 ^ scoreProtTaxo=0.0 ^ 7.625650949316087E-5<=scorePageRankTopoDiv<=8.56468047874572E-5

class DEGRADATION IF : scoreRea=0.3779644730092272 ^ scoreProtTaxo=17.676317209375433 ^ scorePageRankTopoDiv=5.840067482207978E-5 (2)

class DEGRADATION IF : 0.1690308509457033<=scoreRea<=0.2614881801842454 ^ 2.770913290327486<=scoreProtTaxo<=4.389269595667062 ^ 6.872439206549558E-5<=scorePageRankTopoDiv<=6.900065823830583E-5 (7)

class BIOSYNTHESIS IF : scoreRea=0.816496580927726 ^ scoreProtTaxo=29.381948174963497 ^ scorePageRankTopoDiv=1.3811067031774507E-4 (6)

class BIOSYNTHESIS IF : 0.4731054880004788<=scoreRea<=0.655825835783953 ^ 0.2129451608611354<=scoreProtTaxo<=0.5425207638665946 ^ 4.3947989392497114E-5<=scorePageRankTopoDiv<=4.553160486790778E-5 (9)

class DEGRADATION IF : 1.0<=scoreRea<=1.4142135623730951 ^ scoreProtTaxo=0.0 ^ 3.779069584777629E-4<=scorePageRankTopoDiv<=3.9300224993881345E-4 (6)

class BIOSYNTHESIS IF : scoreRea=1.949358868961793 ^ scoreProtTaxo=16.89414776770891 ^ scorePageRankTopoDiv=1.0185105332063447E-4 (3)

class DEGRADATION IF : scoreRea=2.0 ^ scoreProtTaxo=0.0 ^ scorePageRankTopoDiv=1.5710299375717E-4 (2)

class BIOSYNTHESIS IF : 0.7071067811865476<=scoreRea<=0.816496580927726 ^ 2.97.3580011933267<=scoreProtTaxo<=3913.2410008347624 ^ 6.448584985880469E-5<=scorePageRankTopoDiv<=1.194769514392008E-4 (26)

class DETOX IF : 0.7071067811865476<=scoreRea<=0.816496580927726 ^ scoreProtTaxo=0.0 ^ 2.990628864272763E-4<=scorePageRankTopoDiv<=3.081020677346779E-4 (5)

class BIOSYNTHESIS IF : scoreRea=7.155417527999327 ^ scoreProtTaxo=350.7536764461839 ^ scorePageRankTopoDiv=2.2226023968397097E-4 (1)

class BIOSYNTHESIS IF : scoreRea=3.162277660168379 ^ scoreProtTaxo=0.0 ^ scorePageRankTopoDiv=1.4574643740035997E-4 (3)

class BIOSYNTHESIS IF : 1.8027756377319946<=scoreRea<=3.779644730092272 ^ 175.50727843332442<=scoreProtTaxo<=707.9816559175148 ^ 1.4033397296821316E-4<=scorePageRankTopoDiv<=1.5062995730354858E-4 (12)

class BIOSYNTHESIS IF : scoreRea=4.006187165337532 ^ scoreProtTaxo=0.5162840607074476 ^ scorePageRankTopoDiv=2.3928989987570317E-4 (2)

class BIOSYNTHESIS IF : 4.469039979581783<=scoreRea<=4.9613893835683385 ^ 4.06401447787824<=scoreProtTaxo<=5.9733817144801575 ^ 1.500186914875437E-4<=scorePageRankTopoDiv<=1.9060320625320944E-4 (4)

class BIOSYNTHESIS IF : 6.324555320336759<=scoreRea<=7.2048401940794085 ^ 0.0<=scoreProtTaxo<=0.027107567624810956 ^ 1.3831447392257697E-4<=scorePageRankTopoDiv<=4.7412393000109237E-4 (10)

class BIOSYNTHESIS IF : 0.5883484054145521<=scoreRea<=0.7125253031944253 ^ 32.85268093843657<=scoreProtTaxo<=54.451591212359055 ^ 1.0963920554047921E-4<=scorePageRankTopoDiv<=1.1232116545170716E-4 (8)

class OTHER IF : scoreRea=2.752988806446741 ^ scoreProtTaxo=2.140986903025044 ^ scorePageRankTopoDiv=2.4666729467556E-4 (5)

class DEGRADATION IF : scoreRea=2.690370836538197 ^ scoreProtTaxo=115.30167744007765 ^ scorePageRankTopoDiv=1.21168839895759E-4 (3)

class BIOSYNTHESIS IF : scoreRea=1.8257418583505536 ^ scoreProtTaxo=26.946669963812305 ^ scorePageRankTopoDiv=7.086179282175386E-5 (5)

class DEGRADATION IF : 1.224744871391589<=scoreRea<=1.4142135623730951 ^ 79.17823553516814<=scoreProtTaxo<=224.318621212841 ^ 3.4578481937800454E-4<=scorePageRankTopoDiv<=3.936306327135957E-4 (8)

class ENERGY IF : scoreRea=0.34992710611188255 ^ scoreProtTaxo=72.64854370442542 ^ scorePageRankTopoDiv=8.914044698560096E-5 (4)

class DEGRADATION IF : 0.03571428571428571<=scoreRea<=0.07151985398521515 ^ 2.3881652599676126<=scoreProtTaxo<=7.670614106764109 ^ 2.091755686439555E-5<=scorePageRankTopoDiv<=4.027498609978394E-5 (14)

class BIOSYNTHESIS IF : 0.4629100498862757<=scoreRea<=0.4803844614152614 ^ scoreProtTaxo=0.0 ^ 1.2222907282488868E-4<=scorePageRankTopoDiv<=1.2257412972154787E-4 (4)

class BIOSYNTHESIS IF : 0.25819888974716115<=scoreRea<=0.31622776601683794 ^ 124.94102171451942<=scoreProtTaxo<=196.26152482287281 ^ 4.731607333123962E-5<=scorePageRankTopoDiv<=5.672967459123219E-5 (19)

class ENERGY IF : scoreRea=2.0 ^ 23.043090779329386<=scoreProtTaxo<=171.03718661796125 ^ 8.057833970960894E-4<=scorePageRankTopoDiv<=8.212633348548685E-4 (7)

class OTHER IF : scoreRea=3.24037034920393 ^ scoreProtTaxo=16.520431758983598 ^ scorePageRankTopoDiv=1.376020875302525E-4 (5)

class ENERGY IF : scoreRea=1.0 ^ scoreProtTaxo=0.0 ^ scorePageRankTopoDiv=2.621581168434315E-4 (2)

class ENERGY IF : 2.449489742783178<=scoreRea<=2.8284271247461903 ^ 2.6035035240460364<=scoreProtTaxo<=3.416462264904479 ^ 2.0579771942454608E-4<=scorePageRankTopoDiv<=2.3023325596980624E-4 (7)

class ENERGY IF : scoreRea=1.2018504251546631 ^ scoreProtTaxo=20.306853655091704 ^ scorePageRankTopoDiv=1.334518531772253E-4 (1)

class ENERGY IF : scoreRea=0.6837634587578277 ^ scoreProtTaxo=73.53967834571104 ^ scorePageRankTopoDiv=1.9846985407949105E-4 (1)

class BIOSYNTHESIS IF : scoreRea=0.6454972243679028 ^ scoreProtTaxo=3.0093030929956157 ^ scorePageRankTopoDiv=8.528360635683957E-5 (2)

class BIOSYNTHESIS IF : scoreRea=0.5 ^ scoreProtTaxo=1115.3429503058185 ^ scorePageRankTopoDiv=6.967487895208222E-5 (3)

class DEGRADATION IF : 0.9746794344808964<=scoreRea<=1.0 ^ 7.910932501563312<=scoreProtTaxo<=62.32607531484857 ^ 5.5384972988497854E-5<=scorePageRankTopoDiv<=5.673579070415349E-5 (3)

class ENERGY IF : scoreRea=0.17407765595569785 ^ scoreProtTaxo=2.5899363590874156 ^ scorePageRankTopoDiv=8.642067746743294E-5 (3)

class ENERGY IF : 0.31491832864888675<=scoreRea<=0.3636920293639972 ^ 14.540992002260255<=scoreProtTaxo<=21.347301650371904 ^ 8.53579169959795E-5<=scorePageRankTopoDiv<=9.34097088632978E-5 (5)

class BIOSYNTHESIS IF : scoreRea=1.4142135623730951 ^ scoreProtTaxo=25.889356934858828 ^ scorePageRankTopoDiv=1.4266988669730282E-4 (1)

class BIOSYNTHESIS IF : 1.2909944487358056<=scoreRea<=1.311651671567906 ^ 0.0<=scoreProtTaxo<=0.6345180997481727 ^ 1.538649778103079E-4<=scorePageRankTopoDiv<=1.5705232879669777E-4 (5)

class BIOSYNTHESIS IF : scoreRea=1.4142135623730951 ^ scoreProtTaxo=0.0 ^ scorePageRankTopoDiv=1.3814148733742277E-4 (2)

class BIOSYNTHESIS IF : 1.333333333333333<=scoreRea<=1.4142135623730951 ^ 4.254489402727082<=scoreProtTaxo<=18.837414430363225 ^ 1.2775863673017025E-4<=scorePageRankTopoDiv<=1.4036841679306012E-4 (6)

class BIOSYNTHESIS IF : scoreRea=1.4142135623730951 ^ scoreProtTaxo=25.889356934858828 ^ scorePageRankTopoDiv=1.4266988669730282E-4 (1)

class BIOSYNTHESIS IF : scoreRea=1.4142135623730951 ^ scoreProtTaxo=25.889356934858828 ^ scorePageRankTopoDiv=1.4266988669730282E-4 (1)

class BIOSYNTHESIS IF : scoreRea=1.4142135623730951 ^ scoreProtTaxo=25.889356934858828 ^ scorePageRankTopoDiv=1.4266988669730282E-4 (1)

class BIOSYNTHESIS IF : scoreRea=1.4142135623730951 ^ scoreProtTaxo=25.889356934858828 ^ scorePageRankTopoDiv=1.4266988669730282E-4 (1)

class BIOSYNTHESIS IF : scoreRea=1.4142135623730951 ^ scoreProtTaxo=25.889356934858828 ^ scorePageRankTopoDiv=1.4266988669730282E-4 (1)

class BIOSYNTHESIS IF : scoreRea=1.4142135623730951 ^ scoreProtTaxo=25.889356934858828 ^ scorePageRankTopoDiv=1.4266988669730282E-4 (1)

class DEGRADATION IF : scoreRea=0.7071067811865476 ^ scoreProtTaxo=49.53075812056128 ^ scorePageRankTopoDiv=2.128797577747855E-4 (3)

class BIOSYNTHESIS IF : 0.18257418583505536<=scoreRea<=0.454858826147342 ^ 86.68743731527776<=scoreProtTaxo<=154.10754286919666 ^ 8.635506247650476E-6<=scorePageRankTopoDiv<=1.722019170849132E-5 (6)

class DEGRADATION IF : 0.724568837309472<=scoreRea<=0.7385489458759964 ^ 15.845995698294628<=scoreProtTaxo<=33.91166461882087 ^ 3.330277643310726E-5<=scorePageRankTopoDiv<=4.1805930719753834E-5 (10)

(10) class BIOSYNTHESIS IF : 0.5400617248673216<=scoreRea<=0.6030226891555273 ^ scoreProtTaxo=0.0 ^ 3.856354313589377E-5<=scorePageRankTopoDiv<=3.972820985848399E-5

class OTHER IF : scoreRea=0.9428090415820634 ^ scoreProtTaxo=66.20588492072285 ^ scorePageRankTopoDiv=2.242015684498887E-4 (3)

class DEGRADATION IF : scoreRea=2.6457513110645907 ^ scoreProtTaxo=241.16138616799333 ^ scorePageRankTopoDiv=3.360824014842919E-4 (2)

class DEGRADATION IF : 2.0<=scoreRea<=3.2498506536772873 ^ 0.0<=scoreProtTaxo<=0.0024079724851000252 ^ 2.542965180805312E-4<=scorePageRankTopoDiv<=2.95211782315212E-4 (9)

class DEGRADATION IF : scoreRea=1.4142135623730951 ^ scoreProtTaxo=0.0 ^ scorePageRankTopoDiv=3.0243191704417294E-4 (1)

class DEGRADATION IF : 0.5773502691896257<=scoreRea<=0.8660254037844386 ^ 44.831569115369774<=scoreProtTaxo<=77.27660504356028 ^ 3.1345088576072296E-4<=scorePageRankTopoDiv<=3.6066606573853435E-4 (10)

class DEGRADATION IF : scoreRea=1.4142135623730951 ^ scoreProtTaxo=160.94856643572083 ^ scorePageRankTopoDiv=3.1005745950147753E-4 (2)

class DEGRADATION IF : scoreRea=1.0 ^ 32.46883637689602<=scoreProtTaxo<=71.39072873809421 ^ 3.140914019212182E-4<=scorePageRankTopoDiv<=3.268750300999243E-4 (7)

class DEGRADATION IF : 1.4142135623730951<=scoreRea<=2.1602468994692865 ^ 21.13898069316951<=scoreProtTaxo<=74.56938331200074 ^ 3.58337921459429E-4<=scorePageRankTopoDiv<=3.8436270956853036E-4 (10)

class DEGRADATION IF : scoreRea=1.4142135623730951 ^ scoreProtTaxo=0.0 ^ scorePageRankTopoDiv=3.2941395309936893E-4 (3)

class DEGRADATION IF : scoreRea=0.8084520834544432 ^ scoreProtTaxo=16.486688450760568 ^ scorePageRankTopoDiv=4.504717622040652E-5 (2)

class DEGRADATION IF : scoreRea=0.8744746321952062 ^ scoreProtTaxo=62.371656238981856 ^ scorePageRankTopoDiv=5.077560580601176E-5 (4)

class DEGRADATION IF : scoreRea=0.5865884600854132 ^ scoreProtTaxo=0.0 ^ scorePageRankTopoDiv=6.626181790340842E-5 (3)

class DEGRADATION IF : scoreRea=0.655825835783953 ^ scoreProtTaxo=0.12645644717105106 ^ scorePageRankTopoDiv=4.7873986812249354E-5 (1)

class DEGRADATION IF : scoreRea=0.7071067811865476 ^ scoreProtTaxo=29.260568309485883 ^ scorePageRankTopoDiv=6.49456574064399E-5 (4)

class DEGRADATION IF : 0.6123724356957945<=scoreRea<=0.7958224257542215 ^ 0.0<=scoreProtTaxo<=3.8486696703969288 ^ 5.860706774825163E-5<=scorePageRankTopoDiv<=5.8803733051915237E-5 (5)

class DEGRADATION IF : 0.7071067811865476<=scoreRea<=0.8401680504168059 ^ 15.13088285984221<=scoreProtTaxo<=22.94891351632441 ^ 5.673579070415349E-5<=scorePageRankTopoDiv<=5.8739070632628016E-5 (6)

class DEGRADATION IF : scoreRea=0.7071067811865476 ^ scoreProtTaxo=0.0 ^ scorePageRankTopoDiv=5.7345542270816386E-5 (5)

class BIOSYNTHESIS IF : 2.059867849051379<=scoreRea<=2.11332577548596 ^ 0.32552899071239816<=scoreProtTaxo<=1.3575694107361542 ^ 1.8287761797669406E-4<=scorePageRankTopoDiv<=2.2495306725919904E-4 (9)

class BIOSYNTHESIS IF : 2.119864892037657<=scoreRea<=2.140872096444188 ^ 3.2379181783169733<=scoreProtTaxo<=3.6899110841277327 ^ 2.660174404203223E-4<=scorePageRankTopoDiv<=2.985873638512974E-4 (8)

class BIOSYNTHESIS IF : scoreRea=0.7071067811865476 ^ scoreProtTaxo=57.19877992820294 ^ scorePageRankTopoDiv=1.273031544422776E-4 (7)

class BIOSYNTHESIS IF : scoreRea=0.6642111641550714 ^ scoreProtTaxo=4.442629524810974 ^ scorePageRankTopoDiv=9.992258732964255E-5 (2)

class BIOSYNTHESIS IF : scoreRea=0.6546536707079771 ^ scoreProtTaxo=0.0 ^ scorePageRankTopoDiv=9.507727063923345E-5 (1)

class BIOSYNTHESIS IF : 0.18346822357102757<=scoreRea<=0.2672612419124244 ^ 1.0041442365714153<=scoreProtTaxo<=4.894951118682685 ^ 7.206541728125592E-5<=scorePageRankTopoDiv<=9.91658068652667E-5 (9)

class BIOSYNTHESIS IF : 0.5686020318963798<=scoreRea<=0.5773502691896257 ^ scoreProtTaxo=0.0 ^ 9.680375868053309E-5<=scorePageRankTopoDiv<=1.1386306057343698E-4 (8)

class BIOSYNTHESIS IF : 0.09245003270420486<=scoreRea<=0.4472135954999579 ^ 41.11374693353282<=scoreProtTaxo<=90.72358809850219 ^ 9.68361607384624E-5<=scorePageRankTopoDiv<=9.71025528247856E-5 (5)

class DEGRADATION IF : scoreRea=1.5 ^ scoreProtTaxo=328.6761930573438 ^ scorePageRankTopoDiv=1.9482402096573516E-4 (3)

class DEGRADATION IF : 2.449489742783178<=scoreRea<=3.4641016151377544 ^ 186.8047092621161<=scoreProtTaxo<=526.7533706709773 ^ 2.1608188604580465E-4<=scorePageRankTopoDiv<=2.337782760475997E-4 (9)

class BIOSYNTHESIS IF : scoreRea=1.202652838880877 ^ scoreProtTaxo=1.932961341016369 ^ scorePageRankTopoDiv=1.0051476168913065E-4 (4)

class OTHER IF : 0.408248290463863<=scoreRea<=0.5 ^ 355.1112760084071<=scoreProtTaxo<=521.8331253857299 ^ 5.4018423913444024E-5<=scorePageRankTopoDiv<=6.384999288989806E-5 (7)

class BIOSYNTHESIS IF : 0.19839002137983244<=scoreRea<=0.24397501823713327 ^ 1.2825136528866317<=scoreProtTaxo<=34.62065082470671 ^ 4.958838726520721E-5<=scorePageRankTopoDiv<=5.205683608903145E-5 (5)

class BIOSYNTHESIS IF : 0.28867513459481287<=scoreRea<=0.408248290463863 ^ 89.0085484841533<=scoreProtTaxo<=98.81836756108136 ^ 1.1510213213064633E-4<=scorePageRankTopoDiv<=1.185665663845858E-4 (15)

class BIOSYNTHESIS IF : 1.0<=scoreRea<=1.8027756377319946 ^ 199.87966851217695<=scoreProtTaxo<=205.33627510231165 ^ 1.1807420237890181E-4<=scorePageRankTopoDiv<=1.1924321543192456E-4 (7)

class BIOSYNTHESIS IF : scoreRea=0.3086066999241838 ^ scoreProtTaxo=0.0 ^ scorePageRankTopoDiv=4.303619168485682E-5 (1)

class BIOSYNTHESIS IF : scoreRea=0.9746794344808964 ^ scoreProtTaxo=14.537153264002997 ^ scorePageRankTopoDiv=5.4546243901817575E-5 (7)

class OTHER IF : 0.1336306209562122<=scoreRea<=0.2041241452319315 ^ 11.48907832227296<=scoreProtTaxo<=24.204940852237677 ^ 2.277997394999028E-5<=scorePageRankTopoDiv<=2.2992049064083972E-5 (8)

class DEGRADATION IF : 1.0933445471810679<=scoreRea<=1.2126781251816647 ^ scoreProtTaxo=0.0 ^ 1.220459139739041E-4<=scorePageRankTopoDiv<=1.2410399332421477E-4 (5)

class DEGRADATION IF : scoreRea=1.3258750156531338 ^ scoreProtTaxo=0.7079245963934496 ^ scorePageRankTopoDiv=1.295463900452369E-4 (3)

class DEGRADATION IF : 2.1143765594836976<=scoreRea<=2.211398230003235 ^ 33.436888932748474<=scoreProtTaxo<=157.89757001622166 ^ 1.4383666539306183E-4<=scorePageRankTopoDiv<=1.5764329330262091E-4 (4)

class DEGRADATION IF : scoreRea=1.8973665961010275 ^ scoreProtTaxo=0.0 ^ scorePageRankTopoDiv=1.068428112262252E-4 (2)

class DEGRADATION IF : 1.5491933384829668<=scoreRea<=2.0 ^ 24.540654200910076<=scoreProtTaxo<=247.55660370974545 ^ 1.37032589402138E-4<=scorePageRankTopoDiv<=1.3902458959959068E-4 (8)

class DEGRADATION IF : scoreRea=1.224744871391589 ^ scoreProtTaxo=258.6785545214659 ^ scorePageRankTopoDiv=3.191856776052939E-5 (12)

class BIOSYNTHESIS IF : scoreRea=0.8473185457363234 ^ scoreProtTaxo=2.896420549071816 ^ scorePageRankTopoDiv=9.581353925799543E-5 (2)

class DEGRADATION IF : 0.816496580927726<=scoreRea<=1.0 ^ 138.45986359634793<=scoreProtTaxo<=168.12250435495292 ^ 9.184702952142395E-5<=scorePageRankTopoDiv<=1.0609466112632037E-4 (3)

class DEGRADATION IF : scoreRea=0.816496580927726 ^ scoreProtTaxo=128.28625663138507 ^ scorePageRankTopoDiv=1.0926502894973586E-4 (5)

class DEGRADATION IF : scoreRea=0.356034497458156 ^ scoreProtTaxo=0.0 ^ scorePageRankTopoDiv=7.818754435989404E-5 (2)

class DETOX IF : scoreRea=1.4142135623730951 ^ scoreProtTaxo=0.0 ^ scorePageRankTopoDiv=2.1605297494252306E-4 (2)

class BIOSYNTHESIS IF : scoreRea=0.4472135954999579 ^ scoreProtTaxo=41.94715730728113 ^ scorePageRankTopoDiv=1.6197739285580512E-4 (1)  
class BIOSYNTHESIS IF : scoreRea=0.4472135954999579 ^ scoreProtTaxo=41.94715730728113 ^ scorePageRankTopoDiv=1.6197739285580512E-4 (1)  
class BIOSYNTHESIS IF : scoreRea=0.4472135954999579 ^ scoreProtTaxo=41.94715730728113 ^ scorePageRankTopoDiv=1.6197739285580512E-4 (1)  
class BIOSYNTHESIS IF : scoreRea=0.8660254037844386 ^ scoreProtTaxo=0.0 ^ scorePageRankTopoDiv=9.834448953690958E-5 (3)  
class BIOSYNTHESIS IF : scoreRea=1.2909944487358056 ^ scoreProtTaxo=0.6405682128609419 ^ scorePageRankTopoDiv=2.0320445389278625E-4 (3)  
class BIOSYNTHESIS IF : scoreRea=0.5 ^ scoreProtTaxo=25.84565026836747 ^ scorePageRankTopoDiv=4.95954293050021E-5 (4)  
class DEGRADATION IF : scoreRea=0.1180339887498948 ^ scoreProtTaxo=53.33607029865077 ^ scorePageRankTopoDiv=2.221322151018711E-5 (5)  
class DEGRADATION IF : scoreRea=0.33071891388307384 ^ scoreProtTaxo=0.6368952509453817 ^ scorePageRankTopoDiv=2.5582106535976228E-5 (3)  
class OTHER IF : scoreRea=2.035529993132299 ^ scoreProtTaxo=37.18309334171484 ^ scorePageRankTopoDiv=1.6214399066947588E-4 (6)  
class ENERGY IF : 0.22360679774997896<=scoreRea<=0.439586982263858 ^ 0.03824909535505272<=scoreProtTaxo<=0.25395543377941004 ^ 3.4356952197702415E-5<=scorePageRankTopoDiv<=3.5129610103536256E-5 (4)  
class BIOSYNTHESIS IF : 1.7320508075688772<=scoreRea<=1.9364916731037085 ^ 21.379806720813527<=scoreProtTaxo<=139.060820931979 ^ 1.4466068132218887E-4<=scorePageRankTopoDiv<=1.492140440385095E-4 (7)  
class BIOSYNTHESIS IF : scoreRea=0.3872983346207417 ^ scoreProtTaxo=0.0 ^ scorePageRankTopoDiv=5.3414666428876934E-5 (3)  
class BIOSYNTHESIS IF : scoreRea=1.0 ^ scoreProtTaxo=98.40420334876411 ^ scorePageRankTopoDiv=1.7230729652463356E-4 (2)  
class OTHER IF : scoreRea=2.6457513110645907 ^ scoreProtTaxo=11.653831840400214 ^ scorePageRankTopoDiv=1.2548442637641923E-4 (4)  
class DEGRADATION IF : scoreRea=0.7071067811865476 ^ scoreProtTaxo=206.55452266500356 ^ scorePageRankTopoDiv=1.1490929097897867E-4 (2)  
class BIOSYNTHESIS IF : 1.224744871391589<=scoreRea<=1.4142135623730951 ^ 51.50365682807401<=scoreProtTaxo<=105.77882039783354 ^ 2.5761354379839283E-4<=scorePageRankTopoDiv<=2.735898262553504E-4 (5)  
class BIOSYNTHESIS IF : scoreRea=1.7638342073763935 ^ scoreProtTaxo=79.0514992333247 ^ scorePageRankTopoDiv=1.3677116599979192E-4 (3)  
class BIOSYNTHESIS IF : scoreRea=1.949358868961793 ^ scoreProtTaxo=34.87119154833509 ^ scorePageRankTopoDiv=1.359130639592478E-4 (4)  
class BIOSYNTHESIS IF : scoreRea=0.08333333333333333 ^ scoreProtTaxo=71.90009062732221 ^ scorePageRankTopoDiv=3.470487807565085E-5 (3)  
class DEGRADATION IF : scoreRea=0.7071067811865476 ^ 109.4646547441358<=scoreProtTaxo<=146.491662142068 ^ 4.371498400030517E-5<=scorePageRankTopoDiv<=5.058178454993116E-5 (6)  
class DEGRADATION IF : scoreRea=0.23570226039551584 ^ scoreProtTaxo=0.2303427360363902 ^ scorePageRankTopoDiv=1.448780413994269E-4 (2)  
class DETOX IF : scoreRea=1.0 ^ scoreProtTaxo=608.3681488898235 ^ scorePageRankTopoDiv=3.396371341897463E-4 (1)  
class DETOX IF : scoreRea=2.581988897471611 ^ scoreProtTaxo=27.930778633284643 ^ scorePageRankTopoDiv=4.568212402645179E-4 (3)  
class DETOX IF : scoreRea=1.2909944487358056 ^ scoreProtTaxo=0.0 ^ scorePageRankTopoDiv=4.810911994972087E-4 (3)  
class DETOX IF : scoreRea=1.0 ^ scoreProtTaxo=0.0 ^ scorePageRankTopoDiv=2.5005781477850783E-4 (3)  
class DETOX IF : scoreRea=1.4142135623730951 ^ scoreProtTaxo=146.53881007132415 ^ scorePageRankTopoDiv=2.6652816827249016E-4 (2)  
class DETOX IF : scoreRea=1.4142135623730951 ^ scoreProtTaxo=0.0 ^ scorePageRankTopoDiv=3.3284914715507266E-4 (1)  
class DETOX IF : scoreRea=1.0 ^ scoreProtTaxo=290.5100020231181 ^ 2.626806104123039E-4<=scorePageRankTopoDiv<=3.0321704900335665E-4 (5)  
class BIOSYNTHESIS IF : scoreRea=1.0 ^ scoreProtTaxo=0.0 ^ 2.2507399536377622E-4<=scorePageRankTopoDiv<=2.2734171088002557E-4 (8)  
class BIOSYNTHESIS IF : scoreRea=1.7320508075688772 ^ scoreProtTaxo=113.37384803240558 ^ scorePageRankTopoDiv=9.025333891358375E-5 (3)  
class DEGRADATION IF : 0.9013878188659973<=scoreRea<=1.093344547181068 ^ 200.94615943355413<=scoreProtTaxo<=424.7421113040829 ^ 8.070273683221971E-5<=scorePageRankTopoDiv<=8.622735221921629E-5 (9)  
class BIOSYNTHESIS IF : 0.8660254037844386<=scoreRea<=1.0 ^ 308.8787482384362<=scoreProtTaxo<=321.94884504151656 ^ 1.237945613915102E-4<=scorePageRankTopoDiv<=1.2392035308247696E-4 (3)  
class DEGRADATION IF : 0.21081851067789195<=scoreRea<=0.6324555320336759 ^ 6.648788023034921<=scoreProtTaxo<=12.431118389046912 ^ 1.8381833697315455E-4<=scorePageRankTopoDiv<=1.8416305184943934E-4 (7)  
class ENERGY IF : scoreRea=0.7071067811865476 ^ scoreProtTaxo=2.883461995813866 ^ scorePageRankTopoDiv=3.288585667948916E-4 (2)  
class ENERGY IF : scoreRea=0.5898297717679785 ^ scoreProtTaxo=80.88172121496505 ^ scorePageRankTopoDiv=7.984042811155853E-5 (1)  
class BIOSYNTHESIS IF : scoreRea=0.9486832980505138 ^ scoreProtTaxo=492.4769364822055 ^ scorePageRankTopoDiv=6.382584844988021E-5 (4)  
class ENERGY IF : scoreRea=0.16035674514745463 ^ scoreProtTaxo=44.11999794819986 ^ scorePageRankTopoDiv=4.305270368731032E-5 (3)  
class BIOSYNTHESIS IF : scoreRea=1.4142135623730951 ^ scoreProtTaxo=212.39271801691976 ^ scorePageRankTopoDiv=1.306755114111501E-4 (4)  
class DEGRADATION IF : scoreRea=1.1547005383792515 ^ scoreProtTaxo=120.27240963691459 ^ scorePageRankTopoDiv=9.346737750457407E-5 (2)  
class DEGRADATION IF : scoreRea=1.0 ^ scoreProtTaxo=0.0 ^ scorePageRankTopoDiv=2.3162289563086192E-5 (2)  
class ENERGY IF : scoreRea=1.1710800875382399 ^ scoreProtTaxo=83.83084120930127 ^ scorePageRankTopoDiv=3.405667421549469E-4 (4)  
class DEGRADATION IF : 3.7951582057210227<=scoreRea<=4.307507614472608 ^ 0.3018617796253848<=scoreProtTaxo<=1.379921366421163 ^ 1.7404809878674647E-4<=scorePageRankTopoDiv<=1.9574314093248436E-4 (6)  
class BIOSYNTHESIS IF : scoreRea=1.4142135623730951 ^ scoreProtTaxo=0.0 ^ 2.0875414097402804E-4<=scorePageRankTopoDiv<=2.1395082657941635E-4 (6)  
class OTHER IF : 7.082843120291925<=scoreRea<=8.031189202104505 ^ 4.863076241064854<=scoreProtTaxo<=12.209490805052312 ^ 1.0283029333560688E-4<=scorePageRankTopoDiv<=1.0442531089430809E-4 (6)  
class DEGRADATION IF : scoreRea=1.0 ^ scoreProtTaxo=24.522053185615338 ^ scorePageRankTopoDiv=7.175420992019046E-5 (5)  
class BIOSYNTHESIS IF : scoreRea=0.7071067811865476 ^ scoreProtTaxo=6.738311679550256 ^ scorePageRankTopoDiv=5.673579070415349E-5 (4)  
class DEGRADATION IF : scoreRea=1.4142135623730951 ^ scoreProtTaxo=6.461124413009387 ^ scorePageRankTopoDiv=7.304909884610215E-4 (3)  
class BIOSYNTHESIS IF : scoreRea=1.224744871391589 ^ scoreProtTaxo=150.04371593384334 ^ scorePageRankTopoDiv=7.267741345896467E-5 (4)  
class DEGRADATION IF : scoreRea=1.0 ^ 176.6748265891641<=scoreProtTaxo<=265.45642259993303 ^ 1.2292863073691518E-4<=scorePageRankTopoDiv<=1.318125744054719E-4 (7)  
class BIOSYNTHESIS IF : 0.6258327785172862<=scoreRea<=0.696630546019236 ^ 0.3172590498740864<=scoreProtTaxo<=1.0730405606481515 ^ 7.221388362580414E-5<=scorePageRankTopoDiv<=7.693248890515395E-5 (7)  
class DEGRADATION IF : scoreRea=0.6324555320336759 ^ scoreProtTaxo=0.0 ^ scorePageRankTopoDiv=7.186184244774277E-5 (4)  
class BIOSYNTHESIS IF : 0.7071067811865476<=scoreRea<=0.816496580927726 ^ 122.41731903615599<=scoreProtTaxo<=132.7672987437464 ^ 8.461694462624069E-5<=scorePageRankTopoDiv<=8.9145592096062E-5 (3)  
class BIOSYNTHESIS IF : scoreRea=0.5 ^ scoreProtTaxo=59.600361397029246 ^ scorePageRankTopoDiv=6.177647995694302E-5 (3)  
class DEGRADATION IF : 0.5252257314388902<=scoreRea<=1.2909944487358056 ^ 184.36354556058535<=scoreProtTaxo<=184.90955657450604 ^ 7.521950513745555E-5<=scorePageRankTopoDiv<=8.499128390523789E-5 (7)  
class OTHER IF : scoreRea=1.0 ^ scoreProtTaxo=0.0 ^ scorePageRankTopoDiv=2.075060281598621E-4 (2)

class BIOSYNTHESIS IF : scoreRea=0.5 ^ scoreProtTaxo=0.0 ^ scorePageRankTopoDiv=7.06019595021213E-5 (1)  
class DEGRADATION IF : scoreRea=0.4714045207910317 ^ scoreProtTaxo=0.21736656470342558 ^ scorePageRankTopoDiv=2.039267862920187E-4 (3)  
class DEGRADATION IF : scoreRea=0.5773502691896257 ^ scoreProtTaxo=0.0 ^ scorePageRankTopoDiv=2.1673517381795885E-4 (3)  
class BIOSYNTHESIS IF : scoreRea=0.7071067811865476 ^ 37.351611171971676<=scoreProtTaxo<=46.43188130854518 ^ 2.1106370026593825E-4<=scorePageRankTopoDiv<=2.8099010423062484E-4 (4)  
class DEGRADATION IF : scoreRea=4.242640687119285 ^ scoreProtTaxo=0.0 ^ scorePageRankTopoDiv=5.351422632147156E-4 (2)  
class OTHER IF : scoreRea=1.0 ^ scoreProtTaxo=278.9260654725549 ^ scorePageRankTopoDiv=1.5119971642290792E-4 (2)  
class DEGRADATION IF : scoreRea=1.0 ^ scoreProtTaxo=162.15630319750082 ^ scorePageRankTopoDiv=4.63834105930411E-4 (6)  
class DEGRADATION IF : scoreRea=5.392738882336249 ^ scoreProtTaxo=31.56070563126379 ^ scorePageRankTopoDiv=2.6560409197769793E-4 (2)  
class ENERGY IF : scoreRea=0.3469443332443555 ^ scoreProtTaxo=0.008501686508290446 ^ scorePageRankTopoDiv=4.25938615935737E-5 (3)  
class BIOSYNTHESIS IF : scoreRea=0.5773502691896257 ^ scoreProtTaxo=0.0 ^ scorePageRankTopoDiv=1.8401674405587953E-4 (2)  
class BIOSYNTHESIS IF : scoreRea=0.816496580927726 ^ scoreProtTaxo=53.96055802488666 ^ scorePageRankTopoDiv=1.799068798674255E-4 (3)  
class DEGRADATION IF : 6.76930789754497<=scoreRea<=17.580173491749164 ^ 0.25453539884412596<=scoreProtTaxo<=48.876164669699776 ^ 2.27214944912841E-4<=scorePageRankTopoDiv<=5.500256568628485E-4 (3)  
class DEGRADATION IF : scoreRea=0.3779644730092272 ^ scoreProtTaxo=27.294314276743904 ^ scorePageRankTopoDiv=4.608224295654832E-5 (3)  
class ENERGY IF : scoreRea=1.0 ^ scoreProtTaxo=0.0 ^ scorePageRankTopoDiv=2.9556844973405226E-4 (3)  
class BIOSYNTHESIS IF : 0.816496580927726<=scoreRea<=0.8660254037844386 ^ 65.79623872982258<=scoreProtTaxo<=130.03392307060201 ^ 4.77018583093523E-5<=scorePageRankTopoDiv<=5.0451195012364305E-5 (3)  
class DEGRADATION IF : scoreRea=2.8284271247461903 ^ scoreProtTaxo=46.08171497882105 ^ scorePageRankTopoDiv=9.184702952142395E-5 (1)  
class OTHER IF : scoreRea=0.39528470752104744 ^ scoreProtTaxo=67.31782581752879 ^ scorePageRankTopoDiv=3.0197216976965264E-5 (3)  
class BIOSYNTHESIS IF : 0.5773502691896257<=scoreRea<=0.7071067811865476 ^ 0.0<=scoreProtTaxo<=0.22537446792761007 ^ 2.327407772093858E-4<=scorePageRankTopoDiv<=2.423052815653982E-4 (9)  
class BIOSYNTHESIS IF : 0.816496580927726<=scoreRea<=1.0 ^ 32.13477923659716<=scoreProtTaxo<=286.698115661492 ^ 2.16674851498363E-4<=scorePageRankTopoDiv<=2.209479886732525E-4 (12)  
class BIOSYNTHESIS IF : scoreRea=1.0 ^ 15.54358844509754<=scoreProtTaxo<=20.97192084929702 ^ 4.6220909847007676E-4<=scorePageRankTopoDiv<=5.428246164357167E-4 (5)  
class BIOSYNTHESIS IF : 0.8451542547285166<=scoreRea<=0.9428090415820634 ^ 39.943773190847274<=scoreProtTaxo<=217.84101623961143 ^ 2.3351532071486775E-4<=scorePageRankTopoDiv<=2.500264397421409E-4 (11)  
class BIOSYNTHESIS IF : scoreRea=1.632993161855452 ^ scoreProtTaxo=0.0 ^ scorePageRankTopoDiv=7.432112654143253E-5 (2)  
class DEGRADATION IF : scoreRea=0.7071067811865476 ^ scoreProtTaxo=0.0 ^ scorePageRankTopoDiv=7.913623939731866E-5 (8)  
class DEGRADATION IF : scoreRea=0.8966167345234256 ^ scoreProtTaxo=0.0 ^ scorePageRankTopoDiv=7.191567364364338E-5 (1)  
class DEGRADATION IF : scoreRea=1.0 ^ scoreProtTaxo=13.050286539712438 ^ scorePageRankTopoDiv=7.175420992019046E-5 (3)  
class ENERGY IF : scoreRea=0.7071067811865476 ^ scoreProtTaxo=57.22088458559952 ^ scorePageRankTopoDiv=4.163608256714727E-4 (1)  
class ENERGY IF : scoreRea=1.2121830534626528 ^ scoreProtTaxo=0.858760746827019 ^ scorePageRankTopoDiv=4.0904708137729363E-4 (1)  
class ENERGY IF : scoreRea=1.8708286933869707 ^ scoreProtTaxo=291.22705834189765 ^ scorePageRankTopoDiv=3.676671633311061E-4 (2)  
class ENERGY IF : scoreRea=0.7071067811865476 ^ scoreProtTaxo=459.6016391037568 ^ scorePageRankTopoDiv=3.0829274756230974E-4 (2)  
class ENERGY IF : scoreRea=1.0 ^ scoreProtTaxo=101.09186523842465 ^ scorePageRankTopoDiv=3.147732888004335E-4 (4)  
class BIOSYNTHESIS IF : scoreRea=1.0 ^ 0.0<=scoreProtTaxo<=54.48256601886515 ^ 6.892763088378026E-4<=scorePageRankTopoDiv<=6.989120687488944E-4 (2)  
class DEGRADATION IF : scoreRea=0.1336306209562122 ^ scoreProtTaxo=0.0 ^ scorePageRankTopoDiv=1.4624678323885254E-5 (1)  
class DEGRADATION IF : scoreRea=0.07216878364870322 ^ scoreProtTaxo=2.460316855277241 ^ scorePageRankTopoDiv=1.8167629296368919E-5 (2)  
class ENERGY IF : scoreRea=0.08006407690254357 ^ scoreProtTaxo=1.653721012550384 ^ scorePageRankTopoDiv=2.2280734529695785E-5 (1)  
class BIOSYNTHESIS IF : scoreRea=0.6324555320336759 ^ scoreProtTaxo=65.08449599386569 ^ scorePageRankTopoDiv=2.2907062577451448E-4 (5)  
class BIOSYNTHESIS IF : scoreRea=0.7071067811865476 ^ scoreProtTaxo=165.95993492398236 ^ scorePageRankTopoDiv=1.7817525502658317E-4 (2)  
class DEGRADATION IF : 1.0954451150103324<=scoreRea<=1.4142135623730951 ^ 608.5348962878501<=scoreProtTaxo<=639.1599181489809 ^ 1.5862456260021715E-4<=scorePageRankTopoDiv<=2.6220409643941574E-4 (4)  
class BIOSYNTHESIS IF : scoreRea=0.408248290463863 ^ scoreProtTaxo=789.8485696478076 ^ scorePageRankTopoDiv=2.7322301369745626E-4 (5)  
class DEGRADATION IF : scoreRea=2.8284271247461903 ^ scoreProtTaxo=0.0 ^ scorePageRankTopoDiv=1.666222754058243E-4 (3)  
class DEGRADATION IF : scoreRea=1.8257418583505536 ^ scoreProtTaxo=98.4699452170974 ^ scorePageRankTopoDiv=7.104793139068288E-5 (3)  
class DEGRADATION IF : scoreRea=3.289913283319897 ^ scoreProtTaxo=559.0074476741592 ^ scorePageRankTopoDiv=3.0701005128886387E-4 (1)  
class DEGRADATION IF : scoreRea=0.7071067811865476 ^ 0.0<=scoreProtTaxo<=144.7478392962769 ^ 5.034282496324573E-4<=scorePageRankTopoDiv<=6.588344911766697E-4 (5)  
class DEGRADATION IF : scoreRea=1.0 ^ scoreProtTaxo=12.004669260881082 ^ scorePageRankTopoDiv=4.909937360556403E-4 (1)  
class DEGRADATION IF : scoreRea=1.4142135623730951 ^ scoreProtTaxo=41.60349216917426 ^ scorePageRankTopoDiv=5.21570208523604E-4 (2)  
class BIOSYNTHESIS IF : scoreRea=1.224744871391589 ^ scoreProtTaxo=56.161515770653565 ^ scorePageRankTopoDiv=6.948673131421873E-5 (4)  
class BIOSYNTHESIS IF : scoreRea=0.5 ^ scoreProtTaxo=0.0 ^ scorePageRankTopoDiv=5.698856430172402E-5 (2)  
class BIOSYNTHESIS IF : scoreRea=0.7071067811865476 ^ 0.0<=scoreProtTaxo<=2.0863620823036073 ^ scorePageRankTopoDiv=4.985531431087294E-4 (4)  
class DEGRADATION IF : 0.5773502691896257<=scoreRea<=0.7071067811865476 ^ 20.915987692451182<=scoreProtTaxo<=22.440204905652035 ^ 1.6686662865866955E-4<=scorePageRankTopoDiv<=1.7408311085569377E-4 (6)  
class BIOSYNTHESIS IF : scoreRea=0.7071067811865476 ^ scoreProtTaxo=3.110805504795198 ^ scorePageRankTopoDiv=1.0511522598179651E-4 (3)  
class OTHER IF : scoreRea=0.3922322702763681 ^ scoreProtTaxo=0.0 ^ scorePageRankTopoDiv=2.7874776905481745E-5 (4)  
class BIOSYNTHESIS IF : scoreRea=0.31622776601683794 ^ scoreProtTaxo=387.6447516157186 ^ scorePageRankTopoDiv=8.360272329903238E-5 (2)  
class BIOSYNTHESIS IF : scoreRea=0.7071067811865476 ^ scoreProtTaxo=0.0 ^ 1.441783978103374E-4<=scorePageRankTopoDiv<=1.4791573811250174E-4 (9)  
class BIOSYNTHESIS IF : scoreRea=1.1547005383792515 ^ scoreProtTaxo=61.78620275022985 ^ scorePageRankTopoDiv=1.1737307636183124E-4 (1)  
class BIOSYNTHESIS IF : scoreRea=1.118033988749895 ^ scoreProtTaxo=0.0 ^ scorePageRankTopoDiv=5.1313350432075225E-5 (5)  
class BIOSYNTHESIS IF : scoreRea=0.655825835783953 ^ scoreProtTaxo=0.2566072677695416 ^ scorePageRankTopoDiv=1.0879989589336553E-4 (2)  
class BIOSYNTHESIS IF : scoreRea=1.4142135623730951 ^ scoreProtTaxo=0.0 ^ scorePageRankTopoDiv=3.160640423272123E-4 (3)  
class DEGRADATION IF : 1.1372040637927596<=scoreRea<=1.2029375808949572 ^ 1.2821315087821932<=scoreProtTaxo<=1.495970447499228 ^ 1.263409130347141E-4<=scorePageRankTopoDiv<=1.3817645839686696E-4 (4)  
class BIOSYNTHESIS IF : scoreRea=1.118033988749895 ^ scoreProtTaxo=0.0 ^ scorePageRankTopoDiv=2.358103253919151E-4 (3)

```

class BIOSYNTHESIS IF : scoreRea=0.7191949522280763 ^ scoreProtTaxo=55.61823899667411 ^ scorePageRankTopoDiv=1.3556204474833197E-5 (2)
class BIOSYNTHESIS IF : scoreRea=0.1336306209562122 ^ scoreProtTaxo=113.06193486507043 ^ scorePageRankTopoDiv=8.526134756584441E-5 (3)
class DEGRADATION IF : scoreRea=2.680951323690902 ^ scoreProtTaxo=0.011672391865901513 ^ scorePageRankTopoDiv=2.1883160997492087E-4 (4)
class BIOSYNTHESIS IF : scoreRea=1.0 ^ scoreProtTaxo=0.0 ^ scorePageRankTopoDiv=1.9055649310582596E-4 (2)
class BIOSYNTHESIS IF : scoreRea=1.0 ^ scoreProtTaxo=0.0 ^ scorePageRankTopoDiv=1.8860851388601528E-4 (1)
class DEGRADATION IF : 1.0<=scoreRea<=1.1881770515720091 ^ 4.7879252966052475<=scoreProtTaxo<=5.411851401620706 ^ 1.1442075717380128E-4<=scorePageRankTopoDiv<=1.2181717835020451E-4 (4)
class ENERGY IF : scoreRea=3.4641016151377544 ^ scoreProtTaxo=16.560296819002364 ^ scorePageRankTopoDiv=2.120396524500385E-4 (3)
class DEGRADATION IF : scoreRea=1.0 ^ scoreProtTaxo=0.0 ^ scorePageRankTopoDiv=1.1328728240243136E-4 (4)
class ENERGY IF : scoreRea=1.0 ^ scoreProtTaxo=21.7568033167796 ^ scorePageRankTopoDiv=7.011720372293434E-4 (4)
class BIOSYNTHESIS IF : scoreRea=1.0 ^ scoreProtTaxo=0.0 ^ scorePageRankTopoDiv=3.3064912264776746E-4 (1)
class BIOSYNTHESIS IF : scoreRea=1.1114378604524227 ^ scoreProtTaxo=19.8045615400731 ^ scorePageRankTopoDiv=5.409945344885199E-5 (1)
class DEGRADATION IF : scoreRea=5.372405894758811 ^ scoreProtTaxo=64.86872458326154 ^ scorePageRankTopoDiv=2.5451465611213983E-4 (1)
class BIOSYNTHESIS IF : scoreRea=0.9274777915203366 ^ scoreProtTaxo=2.284447209188501 ^ scorePageRankTopoDiv=1.341109037928679E-4 (1)
class BIOSYNTHESIS IF : scoreRea=0.28867513459481287 ^ scoreProtTaxo=1.8435289494404254 ^ scorePageRankTopoDiv=5.057229096274693E-5 (1)
class DEGRADATION IF : scoreRea=7.874007874011811 ^ scoreProtTaxo=83.60493888793984 ^ scorePageRankTopoDiv=9.184702952142395E-5 (4)
class BIOSYNTHESIS IF : scoreRea=0.7071067811865476 ^ scoreProtTaxo=488.5222615194924 ^ scorePageRankTopoDiv=2.954382058651906E-4 (1)
class BIOSYNTHESIS IF : scoreRea=1.0 ^ scoreProtTaxo=99.94050773418287 ^ scorePageRankTopoDiv=5.84516351945006E-4 (5)
class OTHER IF : scoreRea=2.0 ^ scoreProtTaxo=0.0 ^ scorePageRankTopoDiv=4.088733957652656E-4 (2)
class OTHER IF : scoreRea=0.20965696734438366 ^ scoreProtTaxo=62.006127251263905 ^ scorePageRankTopoDiv=3.6903530145216174E-5 (1)
class BIOSYNTHESIS IF : scoreRea=1.0 ^ scoreProtTaxo=0.0 ^ scorePageRankTopoDiv=1.9202370889358065E-4 (1)
class BIOSYNTHESIS IF : scoreRea=2.8535691936340255 ^ scoreProtTaxo=0.0 ^ scorePageRankTopoDiv=3.201551503233059E-4 (2)
class BIOSYNTHESIS IF : scoreRea=1.0 ^ scoreProtTaxo=0.0 ^ scorePageRankTopoDiv=1.9202370889358065E-4 (1)
class DEGRADATION IF : scoreRea=1.4142135623730951 ^ scoreProtTaxo=1121.1691346845957 ^ scorePageRankTopoDiv=1.50642091339147E-4 (2)
class BIOSYNTHESIS IF : scoreRea=0.5 ^ scoreProtTaxo=0.0 ^ scorePageRankTopoDiv=4.787860914058206E-5 (3)
class OTHER IF : scoreRea=2.0 ^ scoreProtTaxo=57.65446242084278 ^ scorePageRankTopoDiv=4.287988675749166E-4 (3)
class DEGRADATION IF : scoreRea=0.7071067811865476 ^ scoreProtTaxo=273.33252297887157 ^ scorePageRankTopoDiv=4.474941279021902E-5 (1)
class OTHER IF : scoreRea=0.8498365855987975 ^ scoreProtTaxo=491.14396928120954 ^ scorePageRankTopoDiv=8.933471786716984E-5 (3)

```

Stat :

```

class DEGRADATION : 315 exemplar(s) including 288 Hyperrectangle(s) and 27 Single(s).
class BIOSYNTHESIS : 455 exemplar(s) including 385 Hyperrectangle(s) and 70 Single(s).
class OTHER : 92 exemplar(s) including 80 Hyperrectangle(s) and 12 Single(s).
class DETOX : 35 exemplar(s) including 31 Hyperrectangle(s) and 4 Single(s).
class ENERGY : 71 exemplar(s) including 64 Hyperrectangle(s) and 7 Single(s).

```

Total : 968 exemplars(s) including 848 Hyperrectangle(s) and 120 Single(s).

Feature weights : [0.026621704589354037 0.013098001491379322 0.03430947381803635]

Time taken to build model: 1.72 seconds

=== Stratified cross-validation ===  
=== Summary ===

|                                  |           |           |
|----------------------------------|-----------|-----------|
| Correctly Classified Instances   | 7822      | 94.7432 % |
| Incorrectly Classified Instances | 434       | 5.2568 %  |
| Kappa statistic                  | 0.9076    |           |
| Mean absolute error              | 0.021     |           |
| Root mean squared error          | 0.145     |           |
| Relative absolute error          | 9.2047 %  |           |
| Root relative squared error      | 42.9119 % |           |
| Total Number of Instances        | 8256      |           |

=== Detailed Accuracy By Class ===

|               | TP Rate | FP Rate | Precision | Recall | F-Measure | ROC Area | Class        |
|---------------|---------|---------|-----------|--------|-----------|----------|--------------|
|               | 0.922   | 0.028   | 0.927     | 0.922  | 0.925     | 0.947    | DEGRADATION  |
|               | 0.965   | 0.06    | 0.958     | 0.965  | 0.961     | 0.952    | BIOSYNTHESIS |
|               | 0.929   | 0.003   | 0.947     | 0.929  | 0.938     | 0.963    | OTHER        |
|               | 0.869   | 0.001   | 0.926     | 0.869  | 0.897     | 0.934    | DETOX        |
|               | 0.935   | 0.004   | 0.939     | 0.935  | 0.937     | 0.966    | ENERGY       |
| Weighted Avg. | 0.947   | 0.043   | 0.947     | 0.947  | 0.947     | 0.952    |              |

=== Confusion Matrix ===

```
  a   b   c   d   e  <-- classified as
2121 151  10  3  15 |   a = DEGRADATION
136 4672 16  6  13 |   b = BIOSYNTHESIS
  13  22 469  0  1 |   c = OTHER
   6  11  0 113  0 |   d = DETOX
  11  20  0  0 447 |   e = ENERGY
```
